# Supplementary material for: Latent environment allocation of microbial community data
Source: PubMed Central journal article supplement (PMC6005635; doi:10.1371/journal.pcbi.1006143), 2018-06-06

360

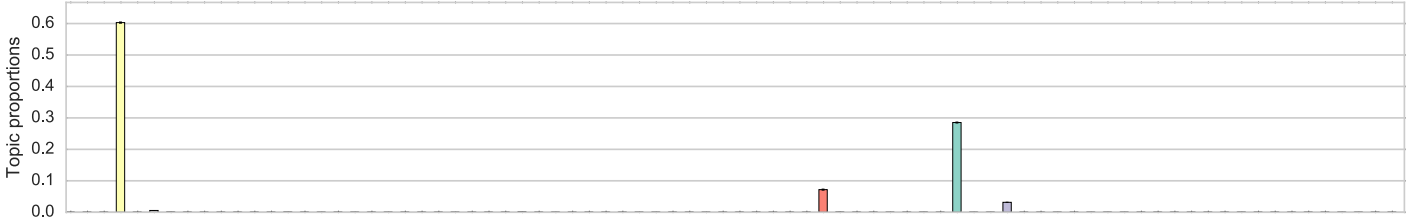

350

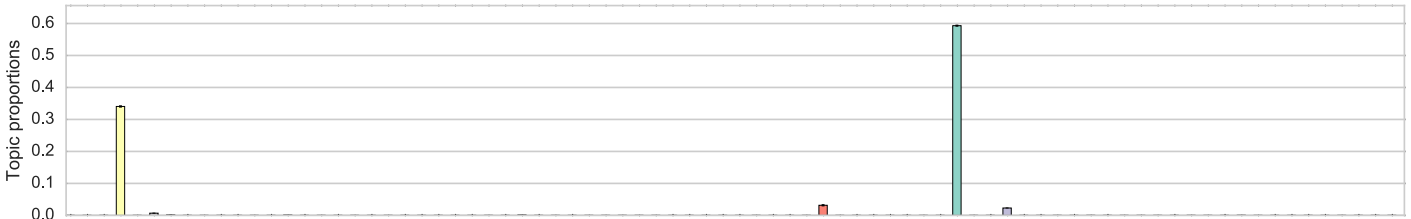

340

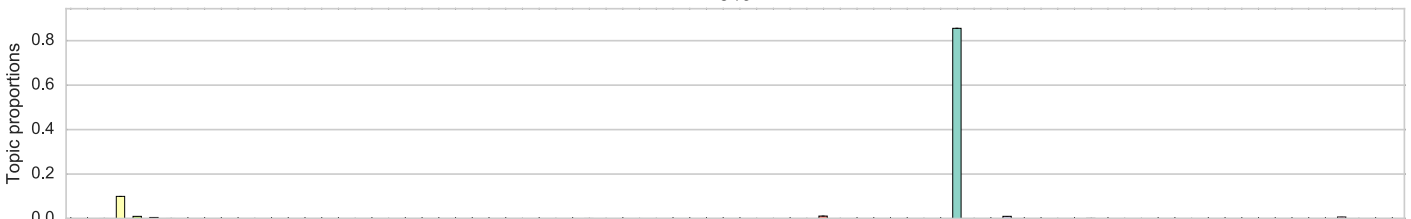

330

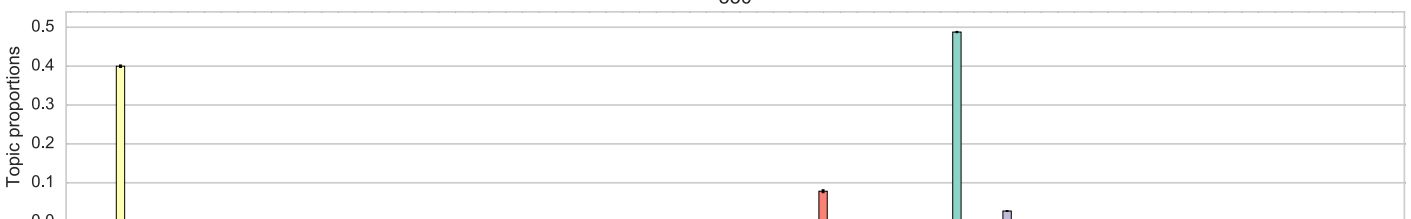

320

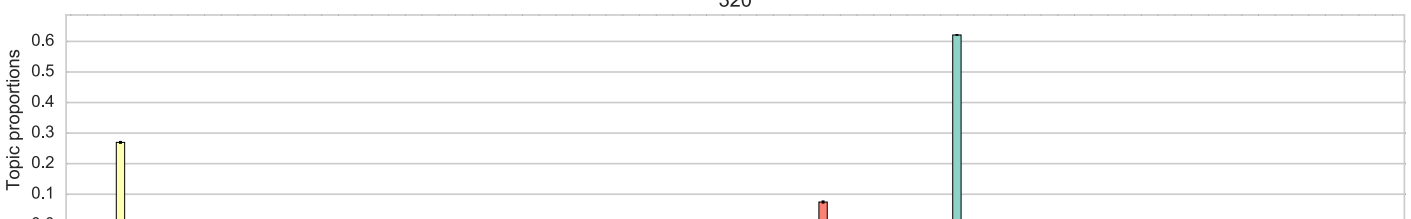

310

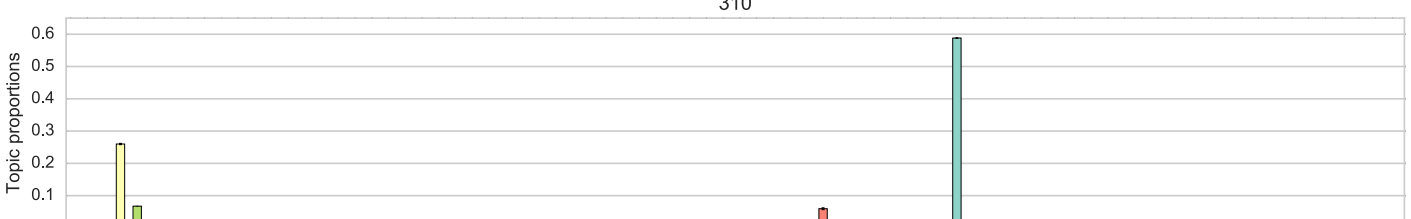

300

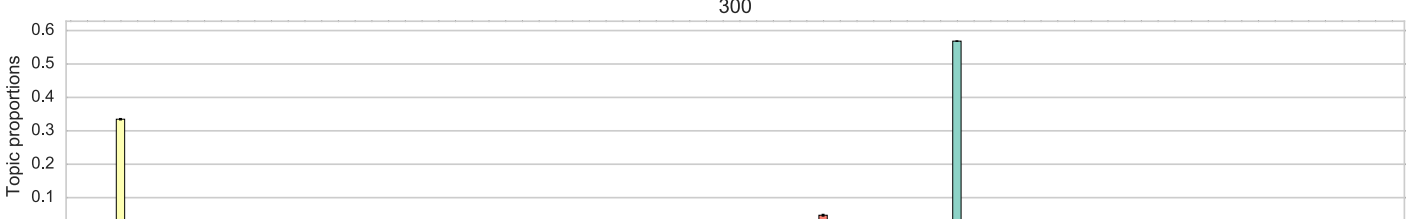

Topic #0  
Topic #1  
Topic #2  
Topic #3  
Topic #4  
Topic #5  
Topic #6  
Topic #7  
Topic #8  
Topic #9  
Topic #10  
Topic #11  
Topic #12  
Topic #13  
Topic #14  
Topic #15  
Topic #16  
Topic #17  
Topic #18  
Topic #19  
Topic #20  
Topic #21  
Topic #22  
Topic #23  
Topic #24  
Topic #25  
Topic #26  
Topic #27  
Topic #28  
Topic #29  
Topic #30  
Topic #31  
Topic #32  
Topic #33  
Topic #34  
Topic #35  
Topic #36  
Topic #37  
Topic #38  
Topic #39  
Topic #40  
Topic #41  
Topic #42  
Topic #43  
Topic #44  
Topic #45  
Topic #46  
Topic #47  
Topic #48  
Topic #49  
Topic #50  
Topic #51  
Topic #52  
Topic #53  
Topic #54  
Topic #55  
Topic #56  
Topic #57  
Topic #58  
Topic #59  
Topic #60  
Topic #61  
Topic #62  
Topic #63  
Topic #64  
Topic #65  
Topic #66  
Topic #67  
Topic #68  
Topic #69  
Topic #70  
Topic #71  
Topic #72  
Topic #73  
Topic #74  
Topic #75  
Topic #76  
Topic #77  
Topic #78  
Topic #79

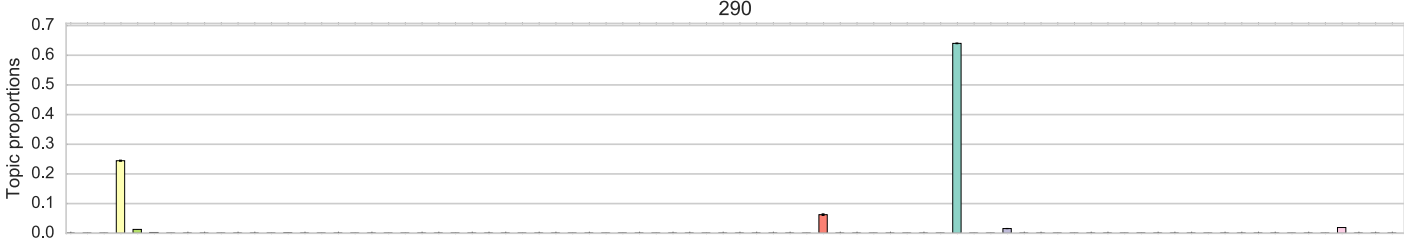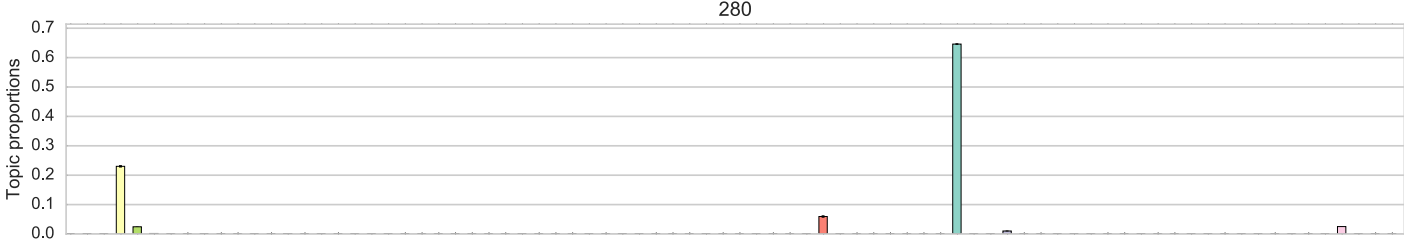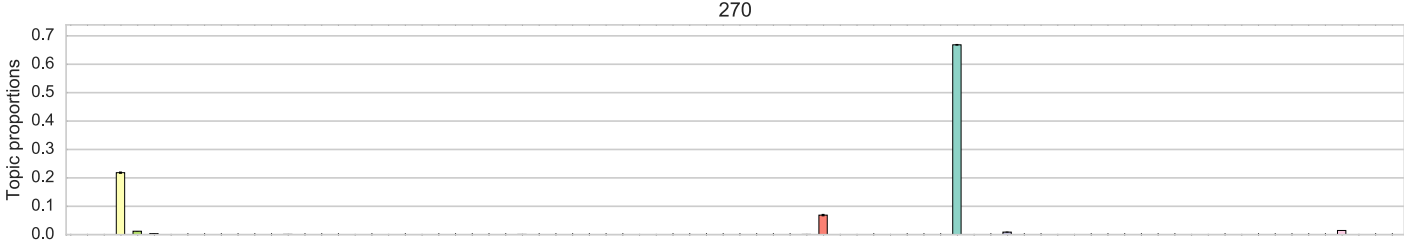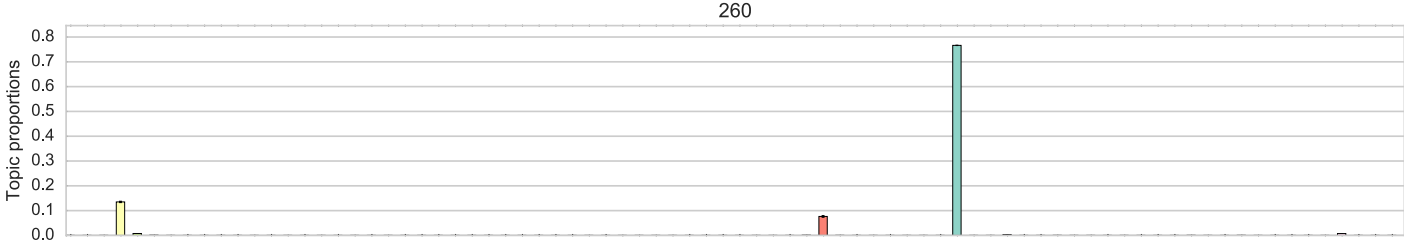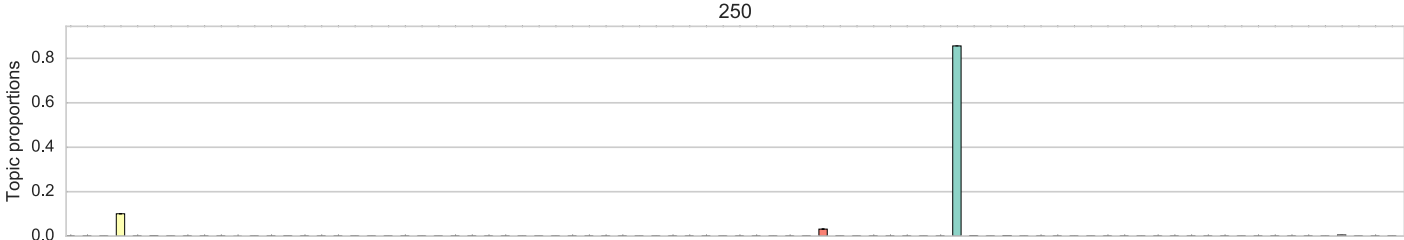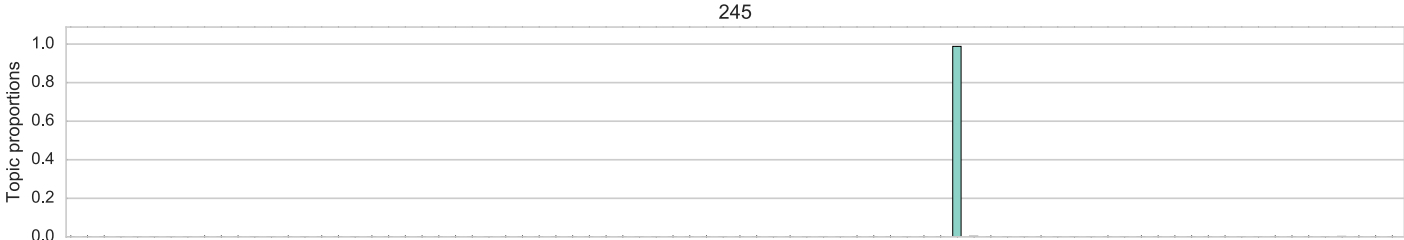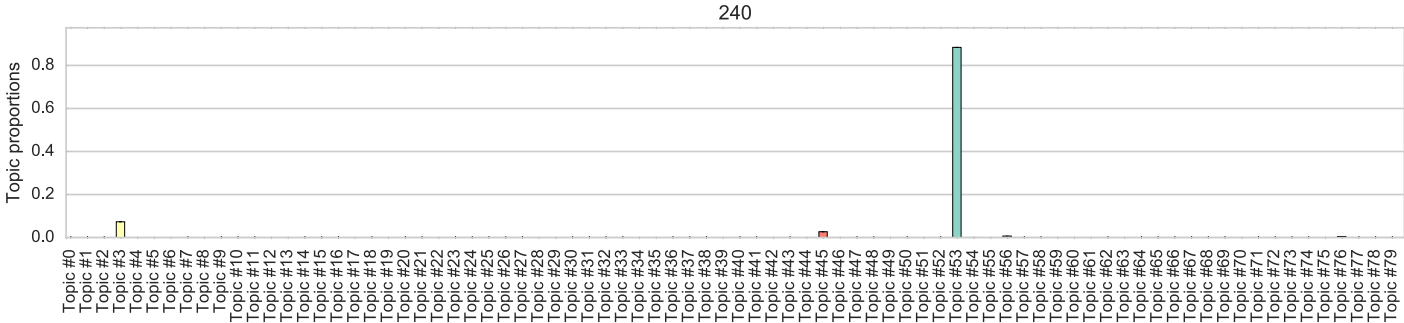





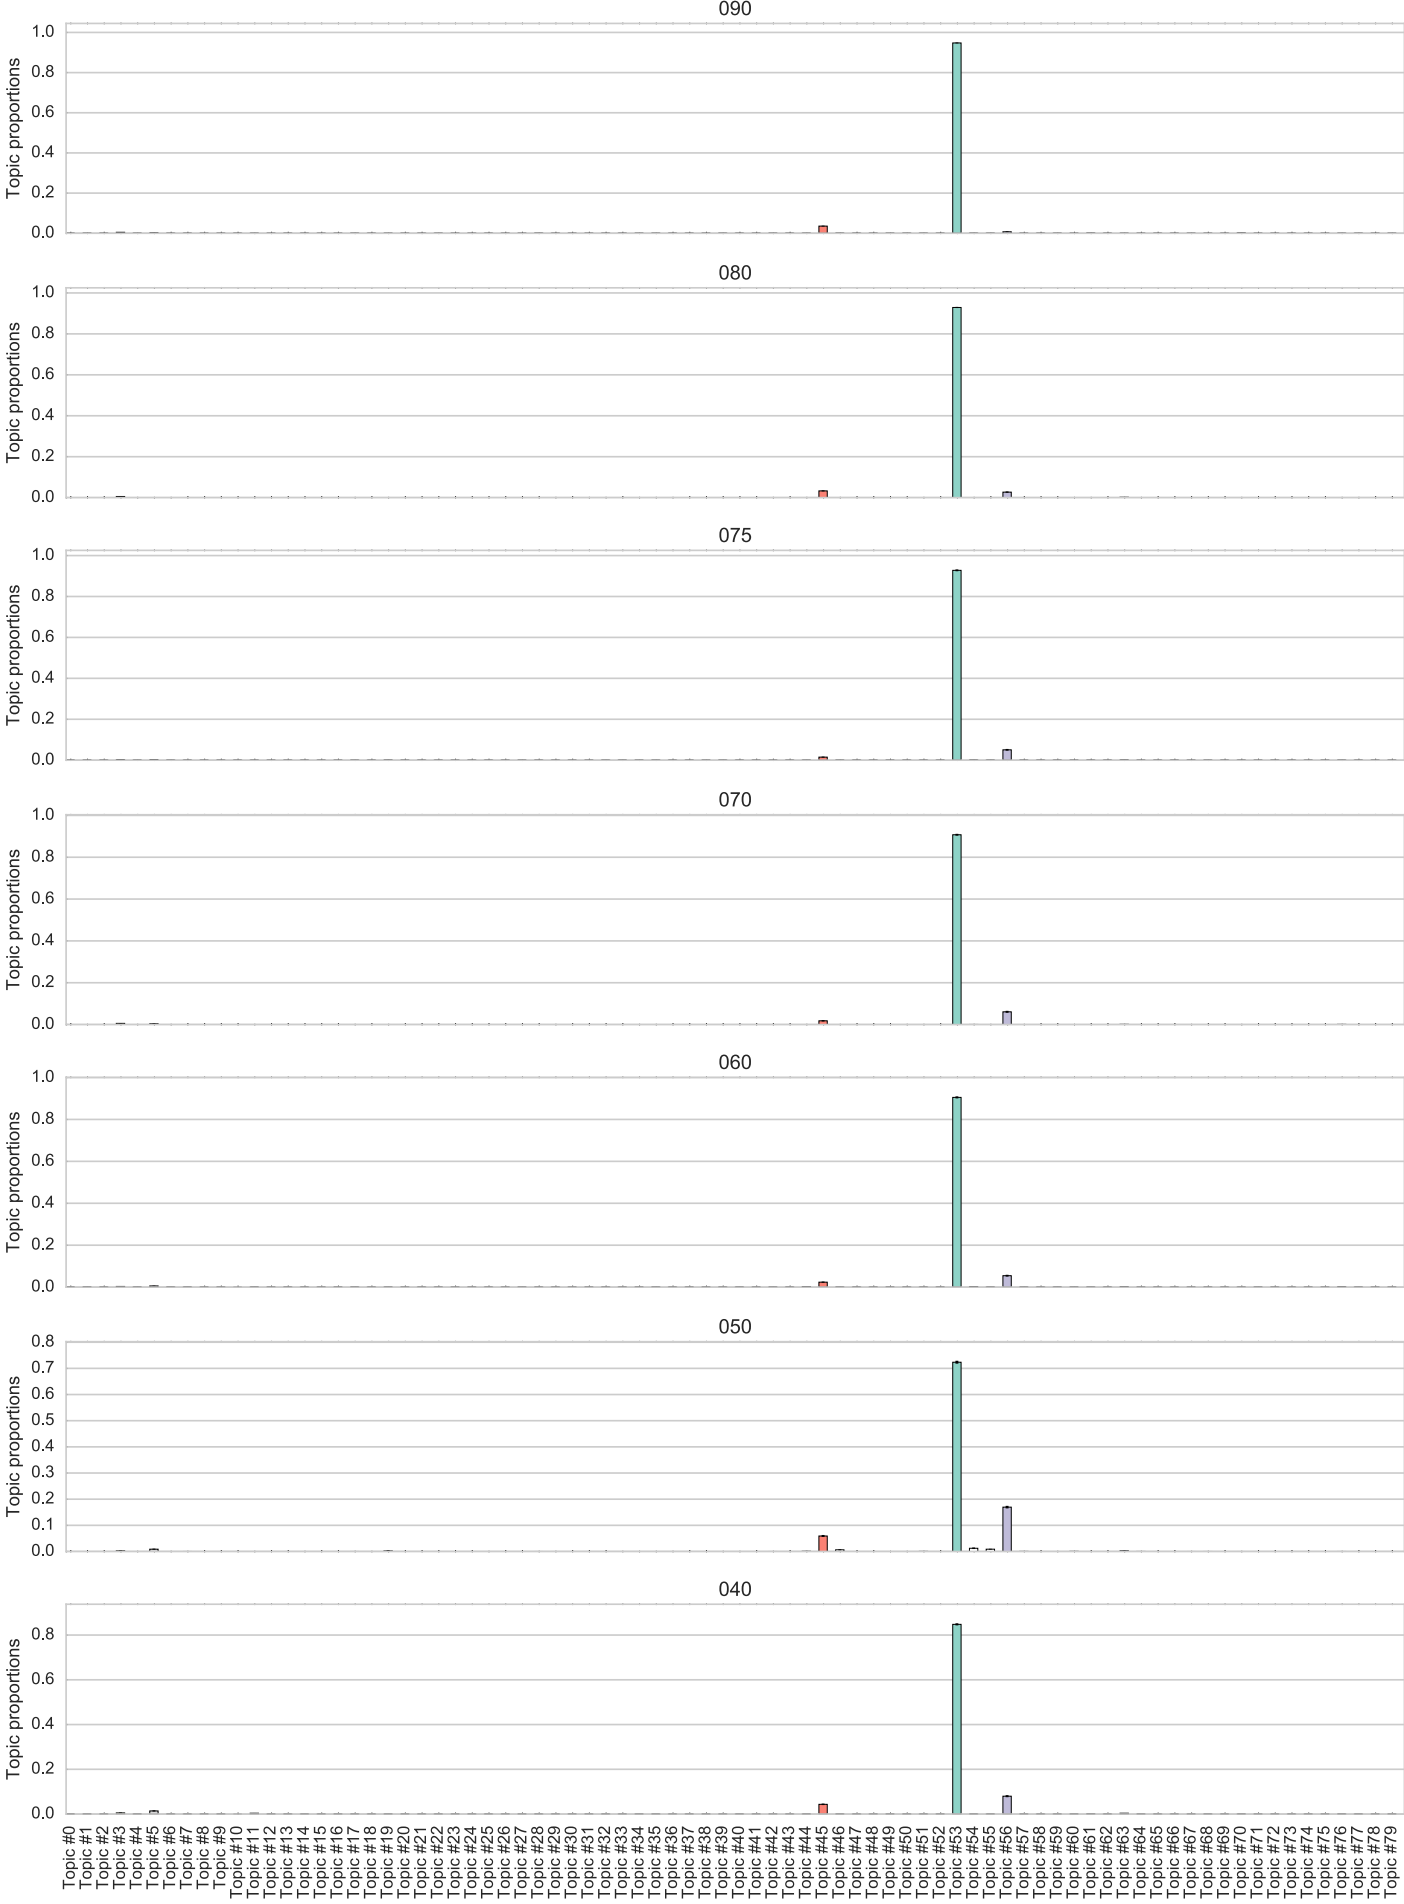

030

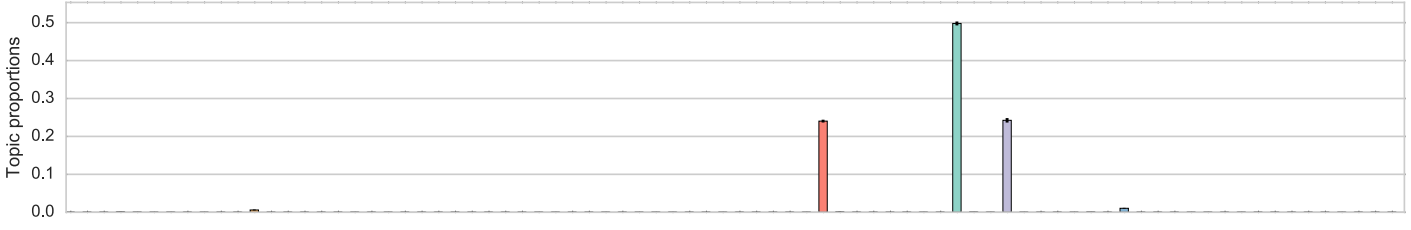

020

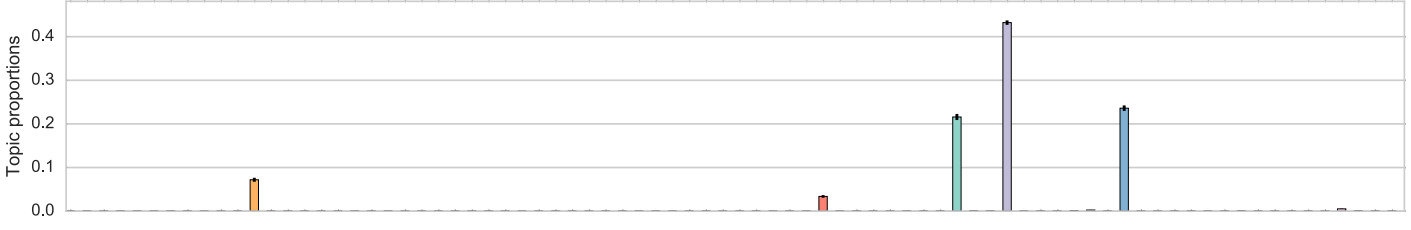

010

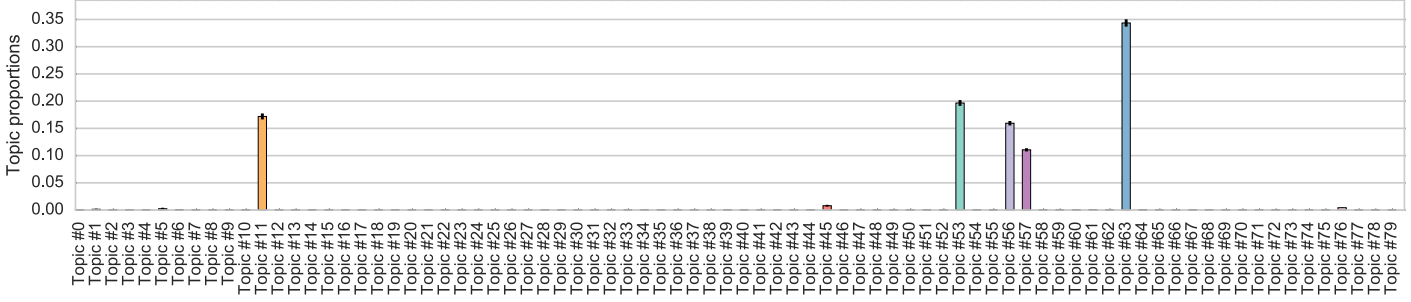

Supplement: pcbi.1006143.s007.pdf [file pcbi.1006143.s007.pdf]
