# Supplementary material for: Latent environment allocation of microbial community data
Source: PubMed Central journal article supplement (PMC6005635; doi:10.1371/journal.pcbi.1006143), 2018-06-06

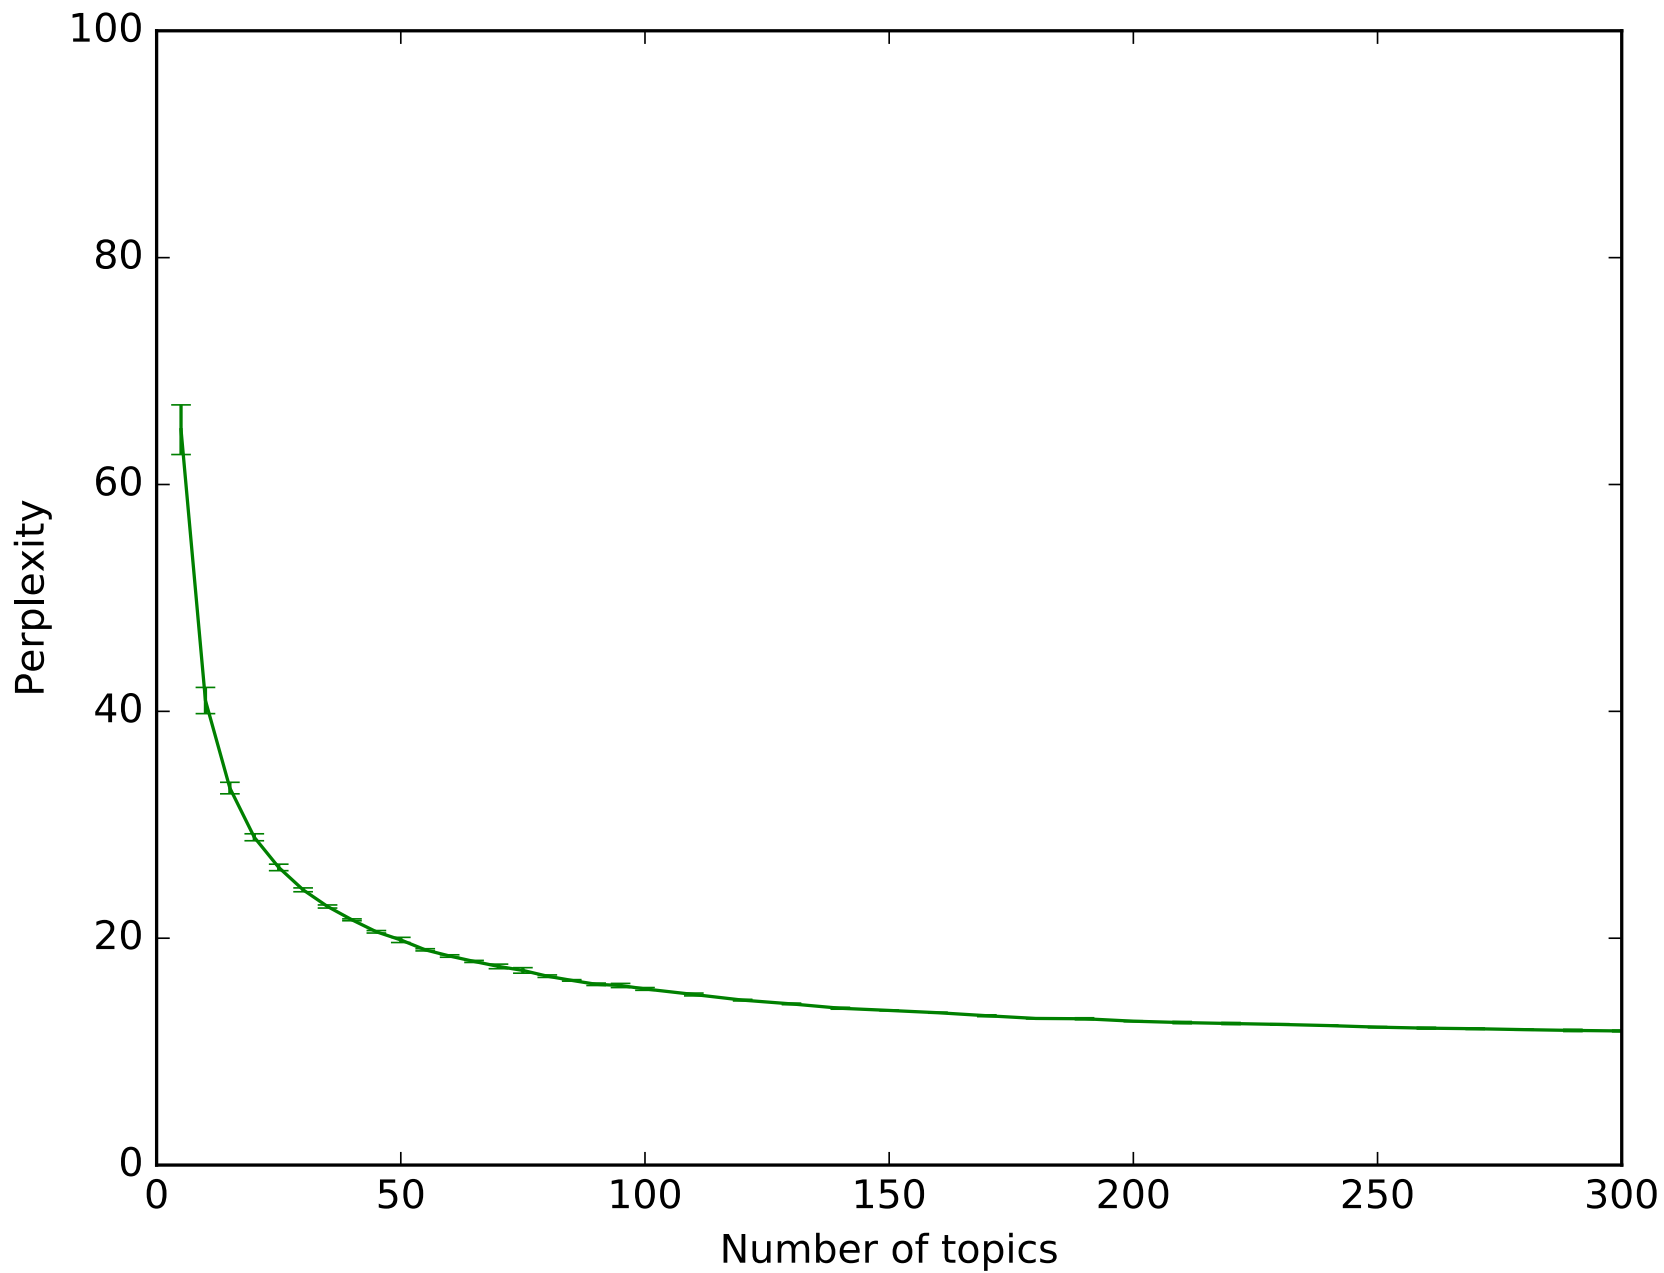

Supplement: pcbi.1006143.s001.pdf [file pcbi.1006143.s001.pdf]
