# Supplementary material for: Latent environment allocation of microbial community data
Source: PubMed Central journal article supplement (PMC6005635; doi:10.1371/journal.pcbi.1006143), 2018-06-06
Supplement: pcbi.1006143.s002.pdf [file pcbi.1006143.s002.pdf]

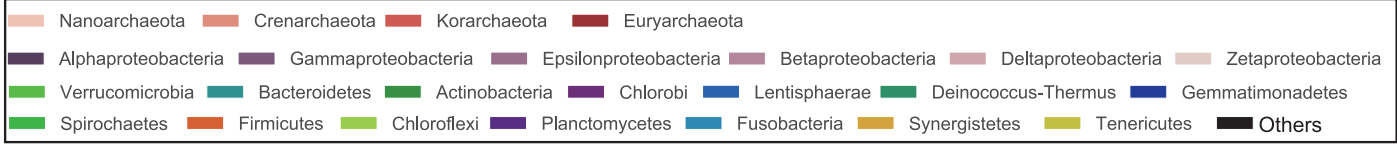

# Topic #0

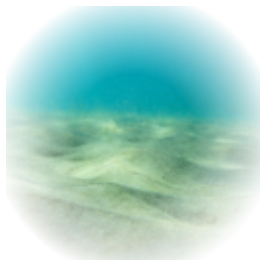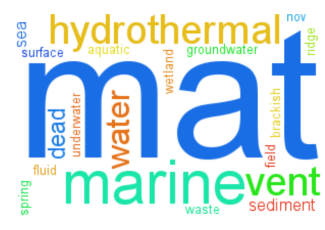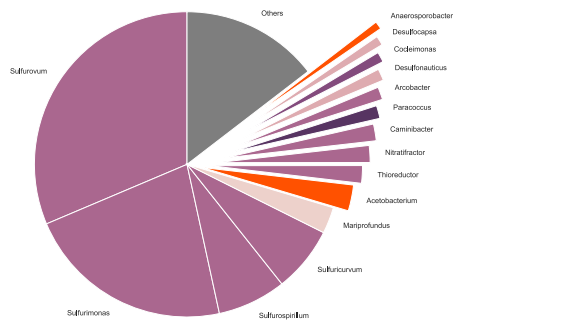

Image from: <https://pixabay.com/en/background-blue-floor-ocean-sand-17520/>

# Topic #1

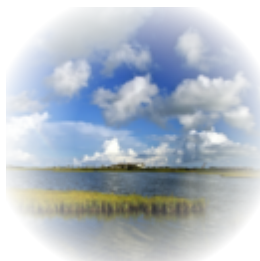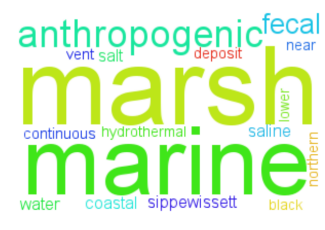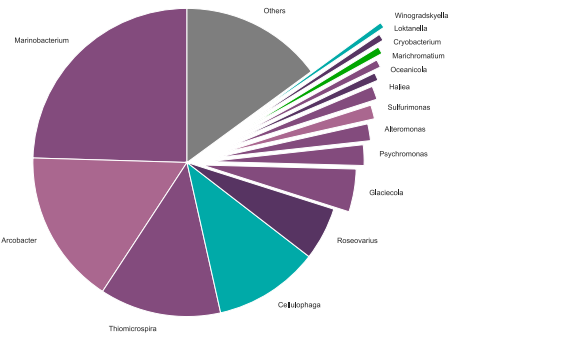

Image from: <https://pixabay.com/en/landscape-scenic-water-outdoors-1593808/>

# Topic #2

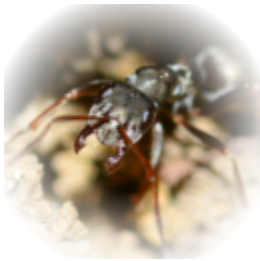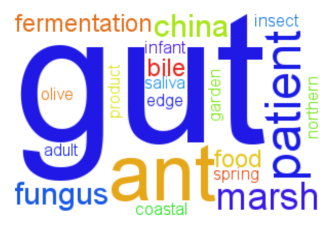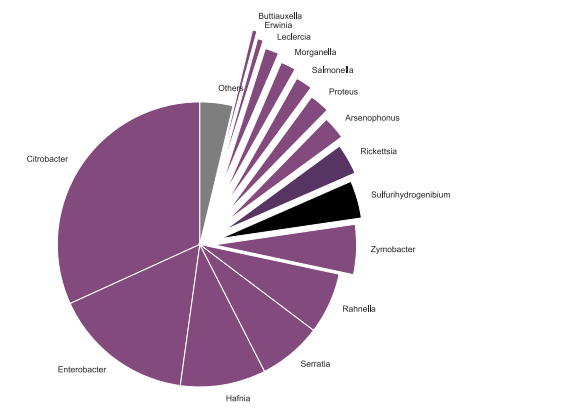

Image from: <https://pixabay.com/en/insects-serviformica-cunicularia-827787/>

# Topic #3

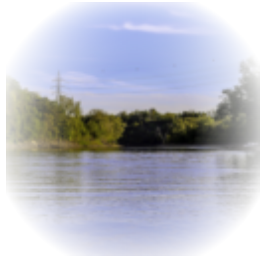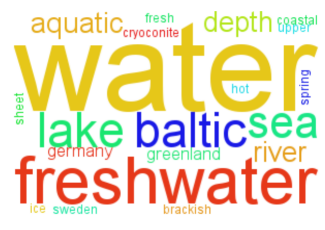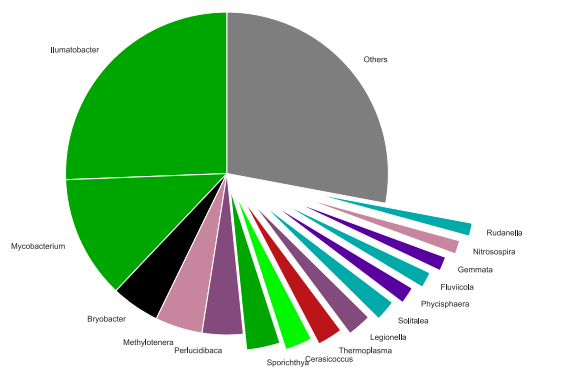

Image from: <https://pixabay.com/en/mississippi-river-landscape-forest-958586/>

# Topic #4

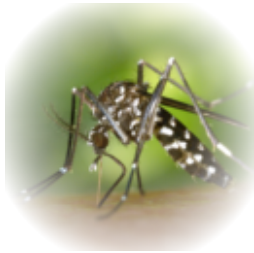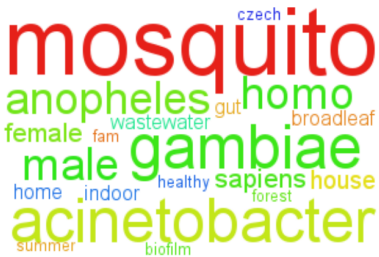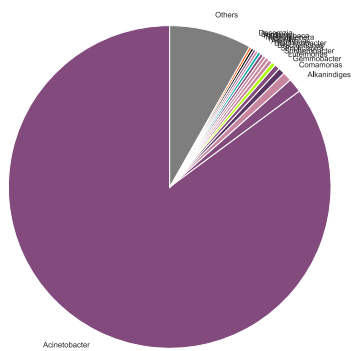

Image from: <https://pixabay.com/en/tiger-mosquito-mosquito-49141/>

# Topic #5

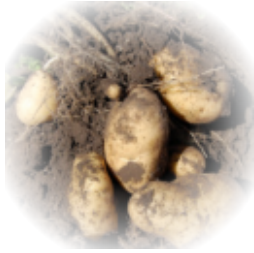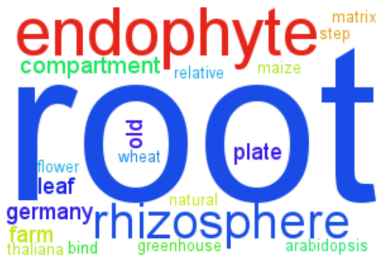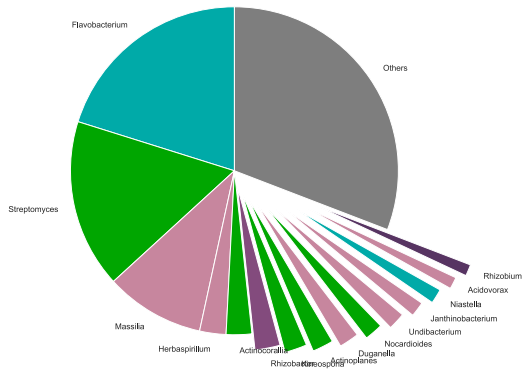

Image from: <https://pixabay.com/en/potatoes-land-fruit-why-potato-1637280/>

# Topic #6

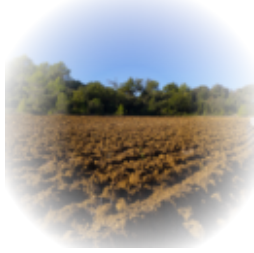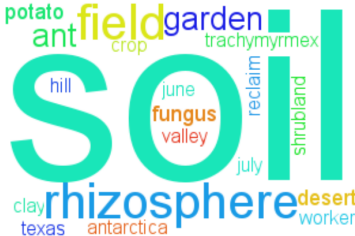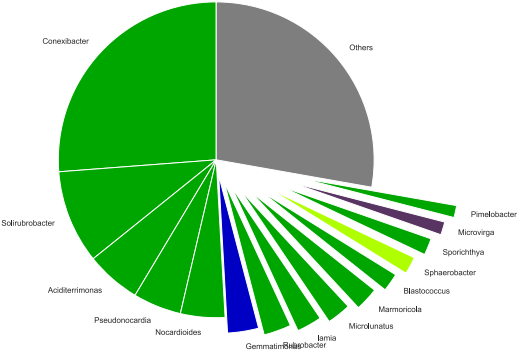

Image from: <https://pixabay.com/en/tractor-labour-agricultural-machine-1732125/>

# Topic #7

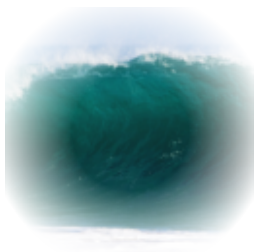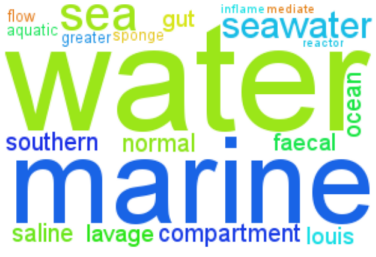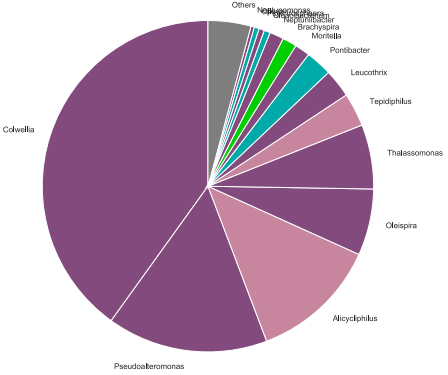

Image from: <https://pixabay.com/en/ocean-wave-sea-water-tide-tidal-918999/>

# Topic #8

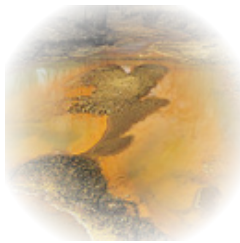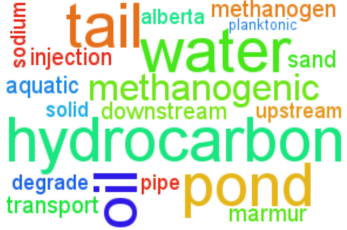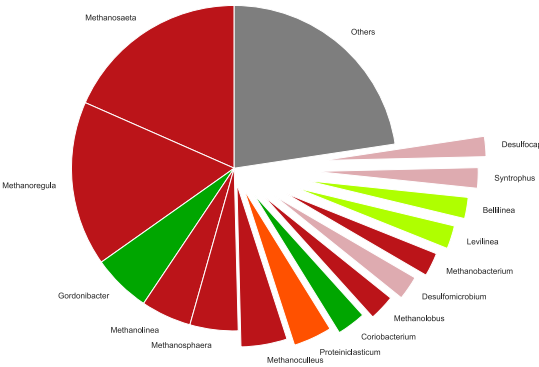

Image from: [https://commons.wikimedia.org/wiki/File%3AIron\\_hydroxide\\_precipitate\\_in\\_stream.jpg](https://commons.wikimedia.org/wiki/File%3AIron_hydroxide_precipitate_in_stream.jpg)

# Topic #9

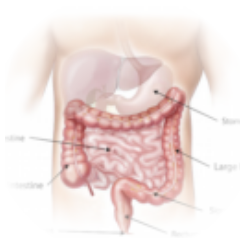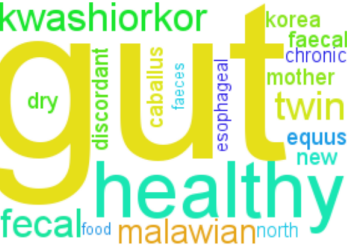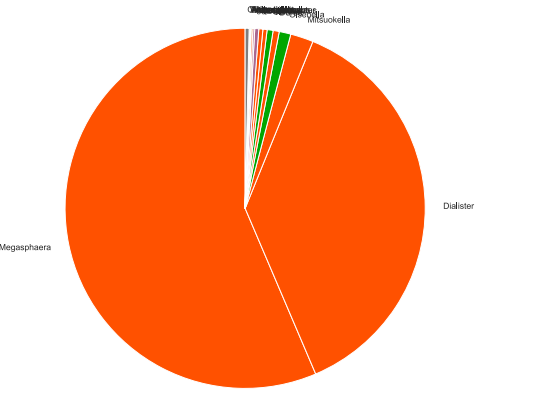

Image from: <https://pixabay.com/en/abdomen-intestine-large-small-1698565/>

# Topic #10

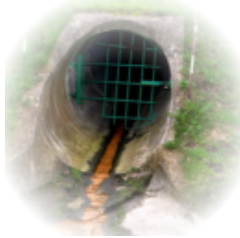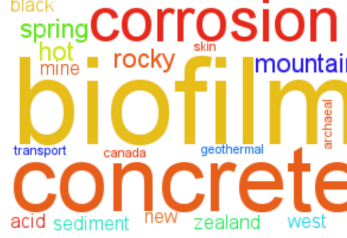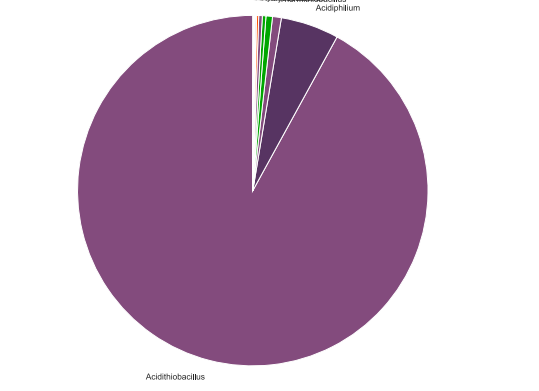

Image from: <https://pixabay.com/en/channel-sewage-sludge-unsanitary-1692671/>

# Topic #11

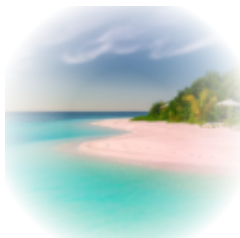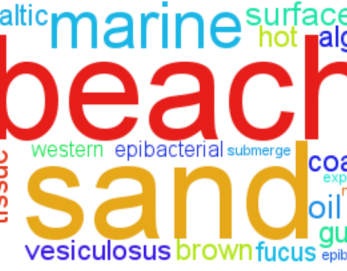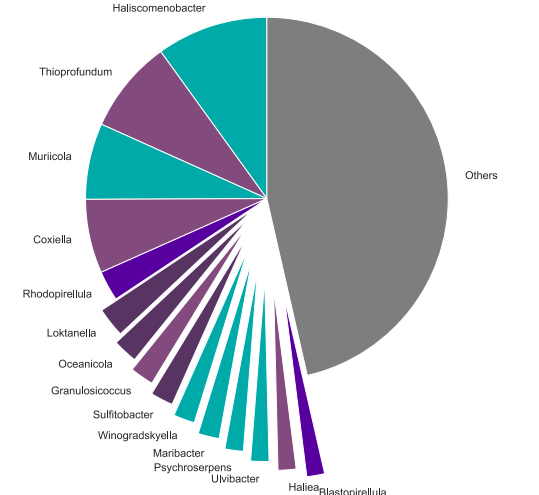

Image from: <https://pixabay.com/en/pink-beach-beach-paradise-1761410/>

# Topic #12

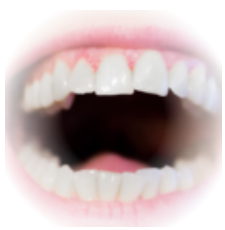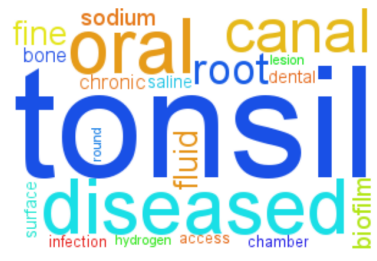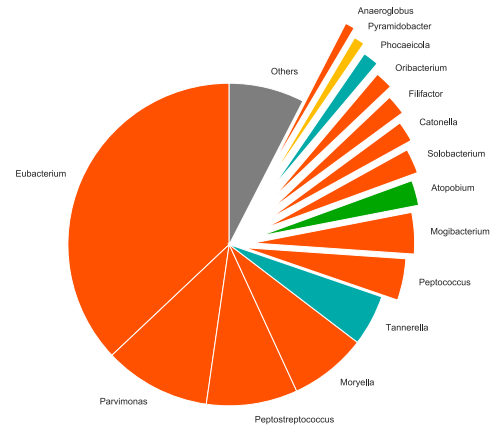

Image from: <https://pixabay.com/en/teeth-dentist-dental-mouth-white-1652937/>

# Topic #13

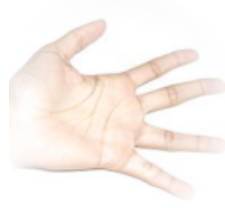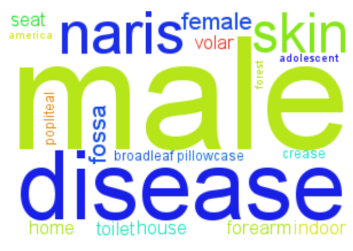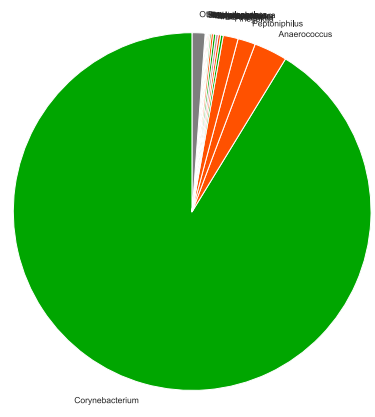

Image from: [https://commons.wikimedia.org/wiki/File%3AHuman\\_Hand.JPG](https://commons.wikimedia.org/wiki/File%3AHuman_Hand.JPG)

# Topic #14

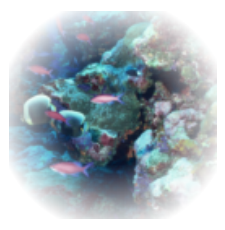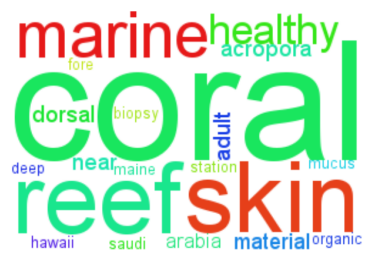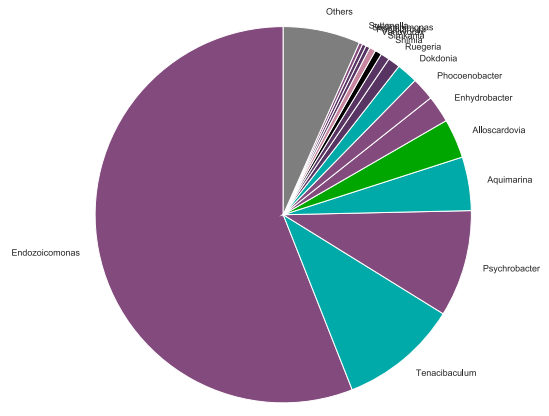

Image from: <https://pixabay.com/en/marine-harbour-underwater-world-1629758/>

# Topic #15

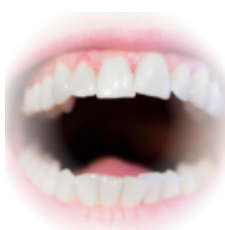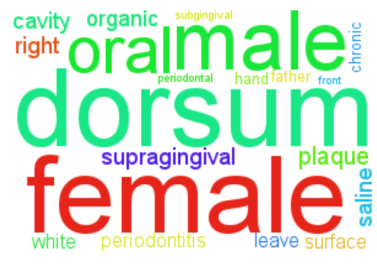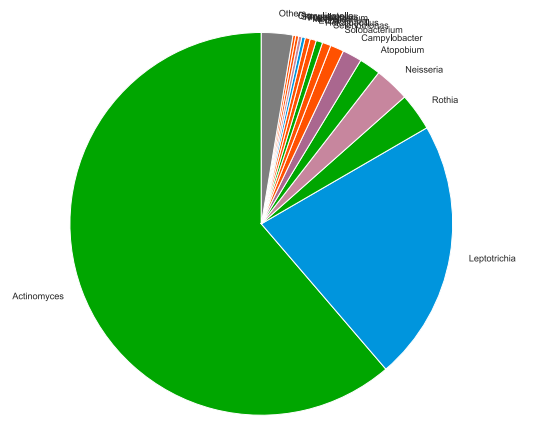

Image from: <https://pixabay.com/en/teeth-dentist-dental-mouth-white-1652937/>



# Topic #16

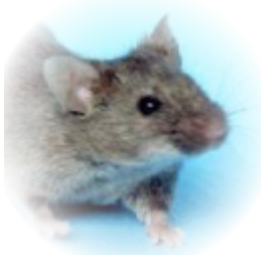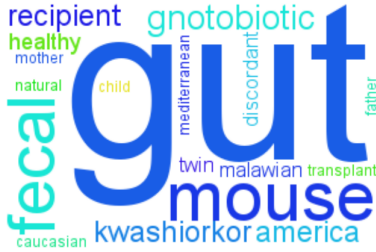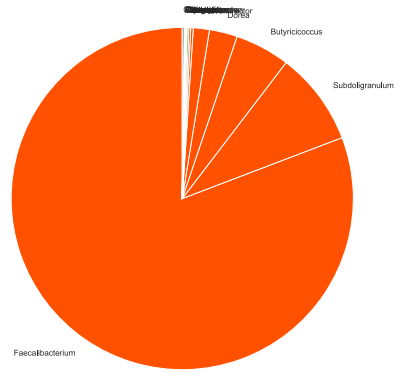

Image from: <https://pixabay.com/en/teeth-dentist-dental-mouth-white-1652937/>

# Topic #17

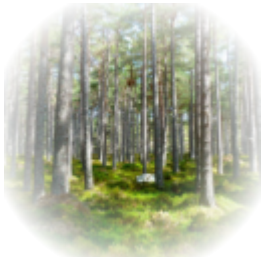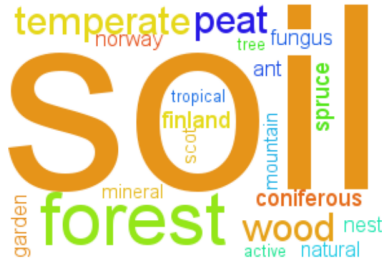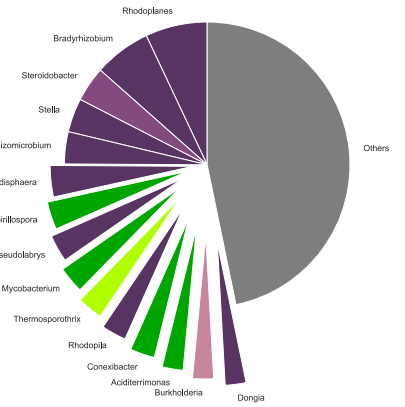

Image from: <https://pixabay.com/en/forest-trees-ecology-environment-272595/>

# Topic #18

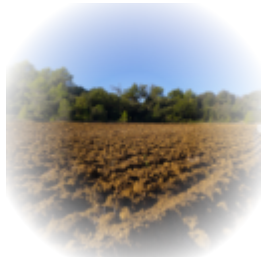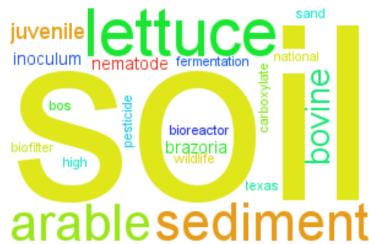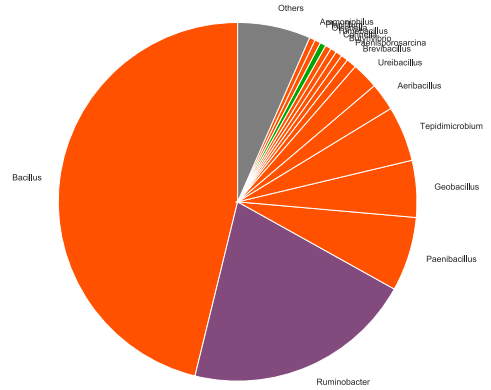

Image from: <https://pixabay.com/en/tractor-labour-agricultural-machine-1732125/>

# Topic #19

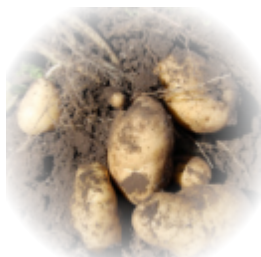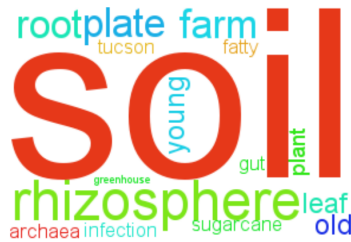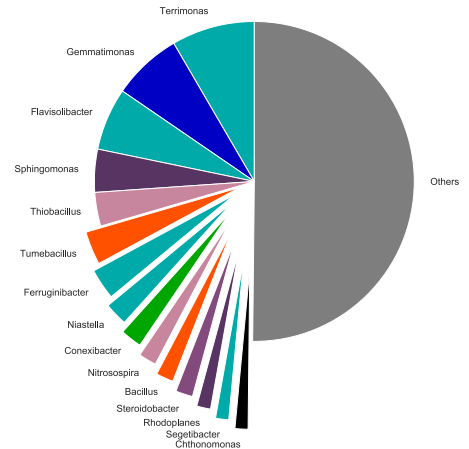

Image from: <https://pixabay.com/en/potatoes-land-fruit-why-potato-1637280/>

# Topic #20

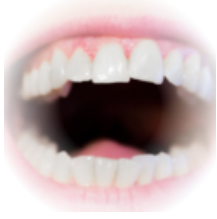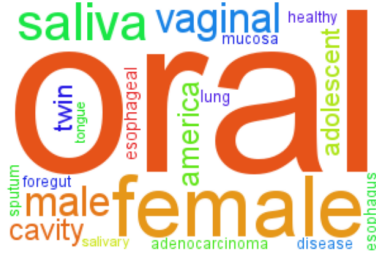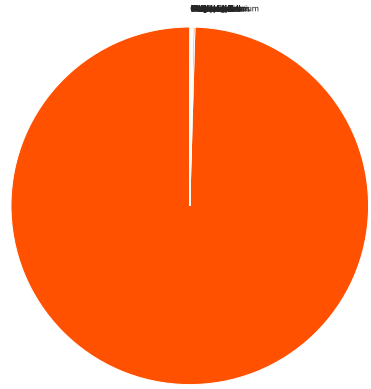

Streptococcus

Image from:

<https://pixabay.com/en/teeth-dentist-dental-mouth-white-1652937/>

# Topic #21

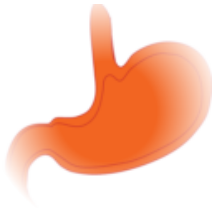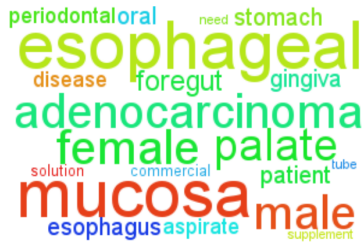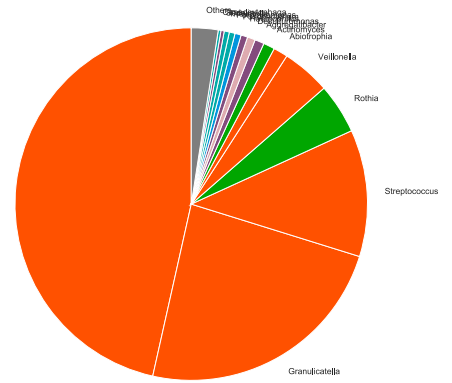

Granulicatella

Image from:

<https://pixabay.com/en/stomach-anatomy-human-body-biology-310730/>

# Topic #22

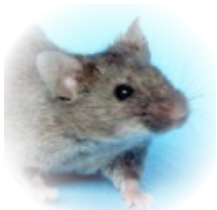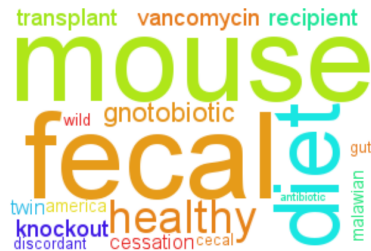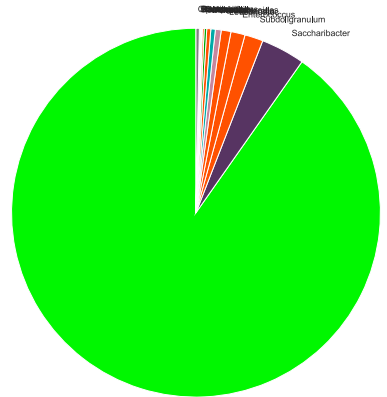

Akkermansia

Image from:

[https://commons.wikimedia.org/wiki/File%3AHouse\\_mouse.jpg](https://commons.wikimedia.org/wiki/File%3AHouse_mouse.jpg)

# Topic #23

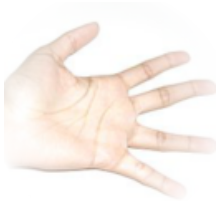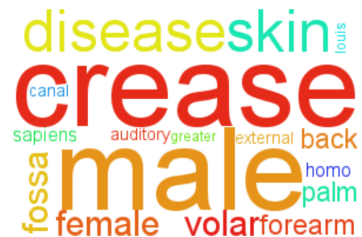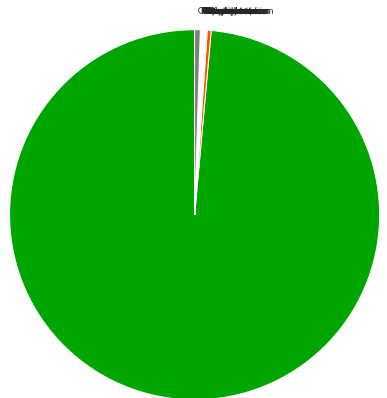

Propionibacterium

Image from:

[https://commons.wikimedia.org/wiki/File%3AHuman\\_Hand.JPG](https://commons.wikimedia.org/wiki/File%3AHuman_Hand.JPG)



# Topic #28

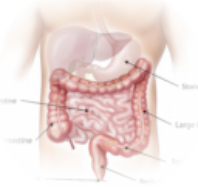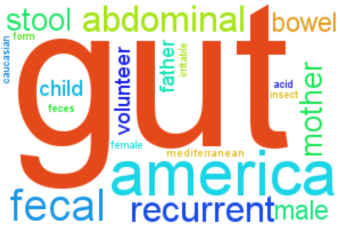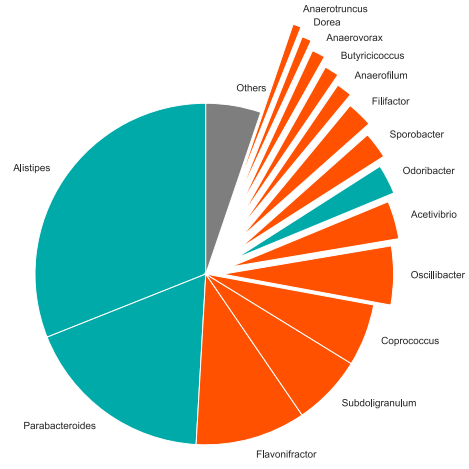

Image from: <https://pixabay.com/en/abdomen-intestine-large-small-1698565/>

# Topic #29

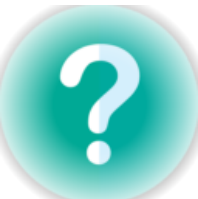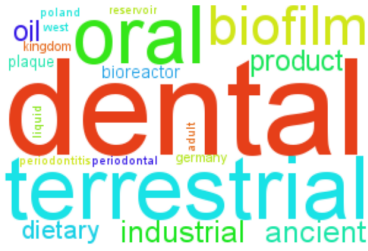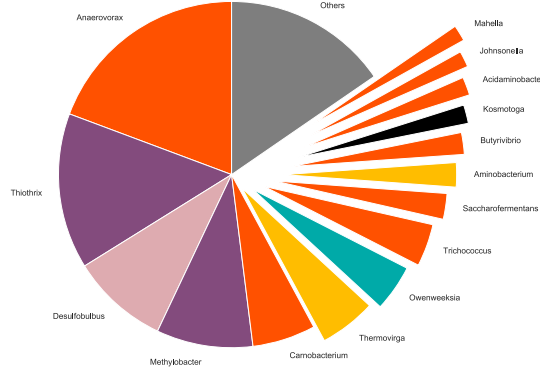

Image from: <https://pixabay.com/en/help-information-question-tip-1724292/>

# Topic #30

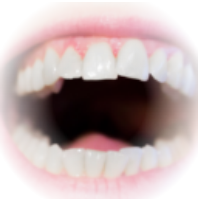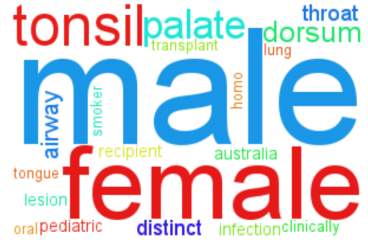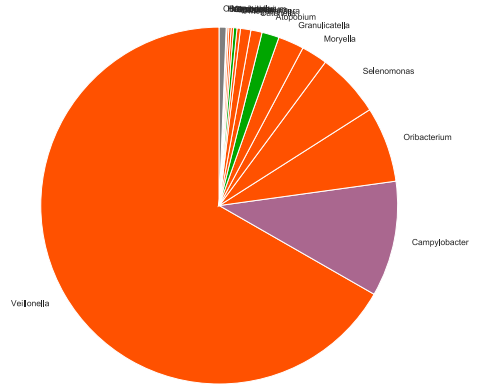

Image from: <https://pixabay.com/en/teeth-dentist-dental-mouth-white-1652937/>

# Topic #31

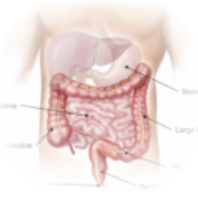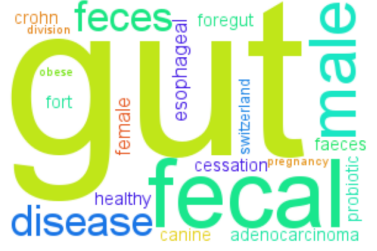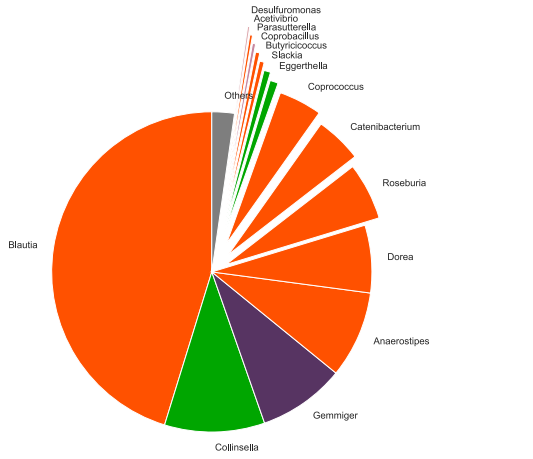

Image from: <https://pixabay.com/en/abdomen-intestine-large-small-1698565/>
