# Supplementary material for: Latent environment allocation of microbial community data
Source: PubMed Central journal article supplement (PMC6005635; doi:10.1371/journal.pcbi.1006143), 2018-06-06
Supplement: pcbi.1006143.s003.pdf [file pcbi.1006143.s003.pdf]

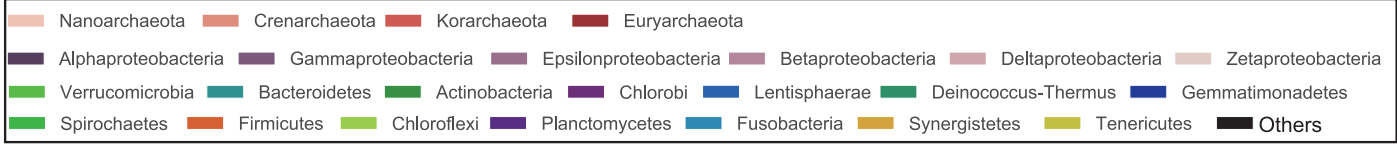

### Topic #40

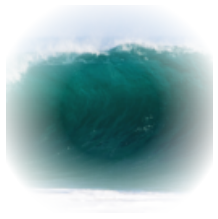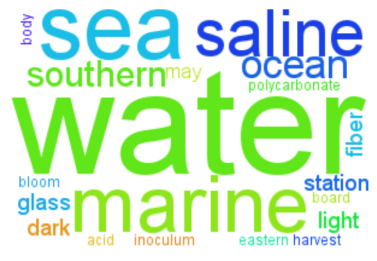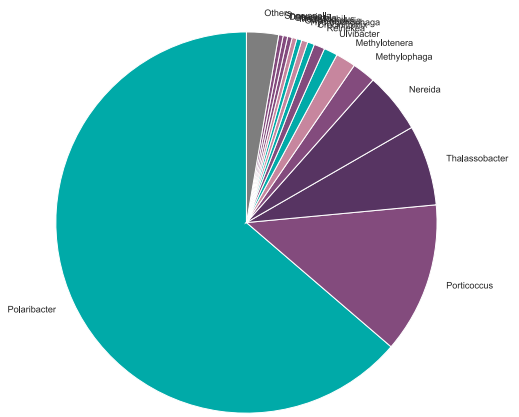

Image from: <https://pixabay.com/en/calf-field-farm-rural-agriculture-1726620/>

### Topic #41

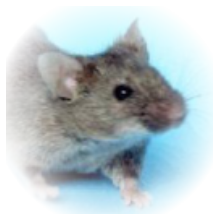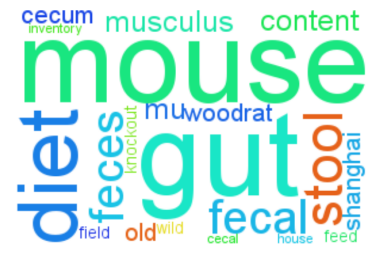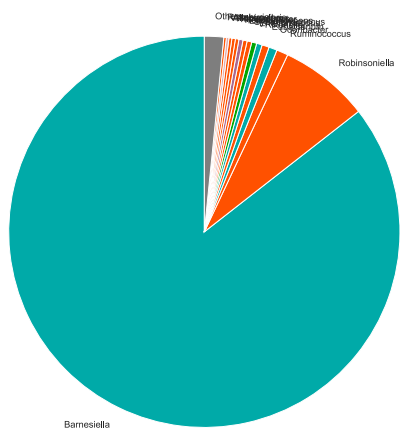

Image from: [https://commons.wikimedia.org/wiki/File%3AHouse\\_mouse.jpg](https://commons.wikimedia.org/wiki/File%3AHouse_mouse.jpg)

### Topic #42

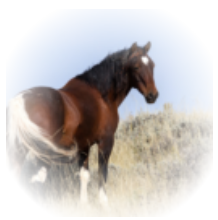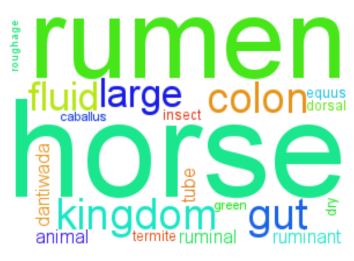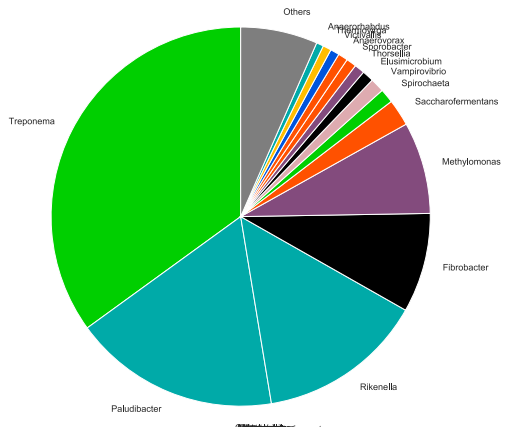

Image from: <https://pixabay.com/en/wild-horses-wild-mustangs-mustangs-1760581/>

### Topic #43

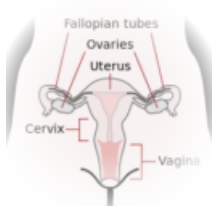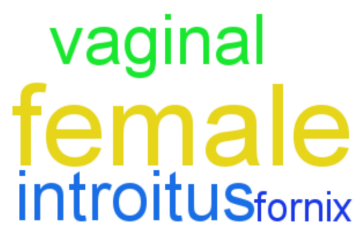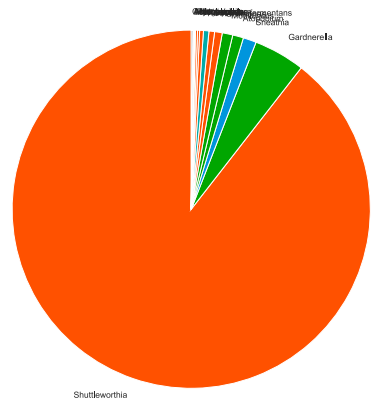

Image from: [https://commons.wikimedia.org/wiki/File%3AScheme\\_female\\_reproductive\\_system-en.svg](https://commons.wikimedia.org/wiki/File%3AScheme_female_reproductive_system-en.svg)

# Topic #44

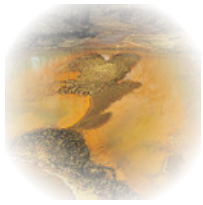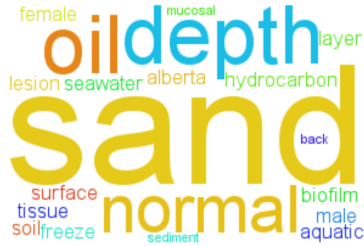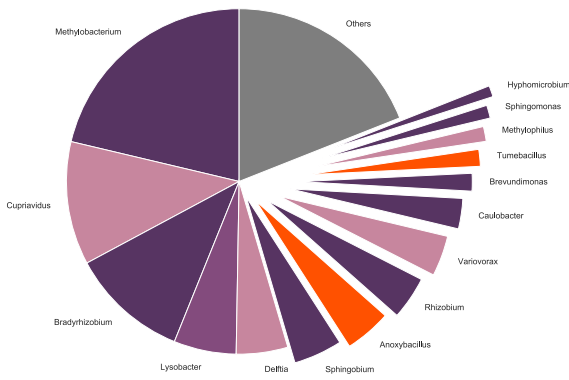

Image from: [https://commons.wikimedia.org/wiki/File%3AIron\\_hydroxide\\_precipitate\\_in\\_stream](https://commons.wikimedia.org/wiki/File%3AIron_hydroxide_precipitate_in_stream).

# Topic #45

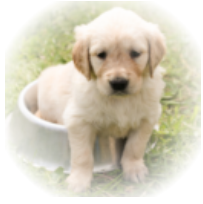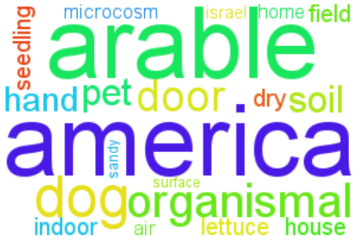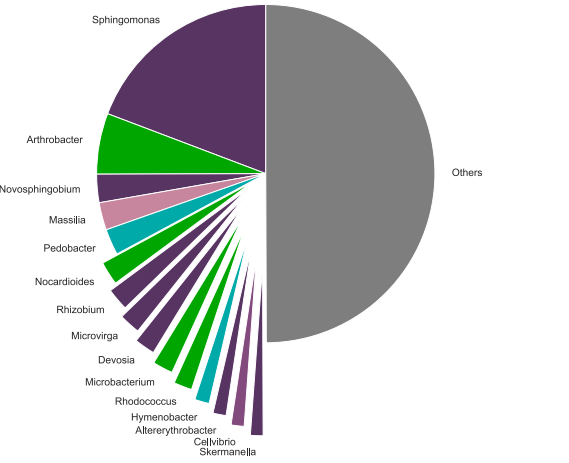

Image from: <https://pixabay.com/en/puppy-golden-retriever-dog-1207816/>

# Topic #46

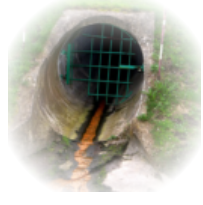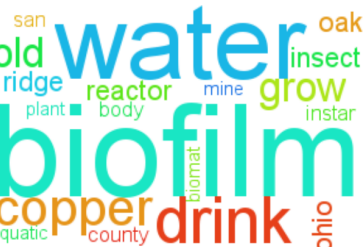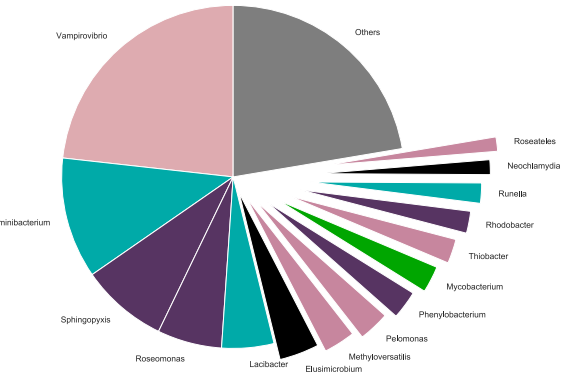

Image from: <https://pixabay.com/en/channel-sewage-sludge-unsanitary-1692671/>

# Topic #47

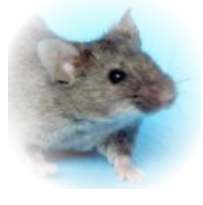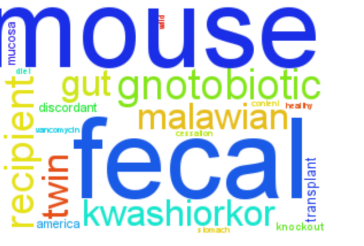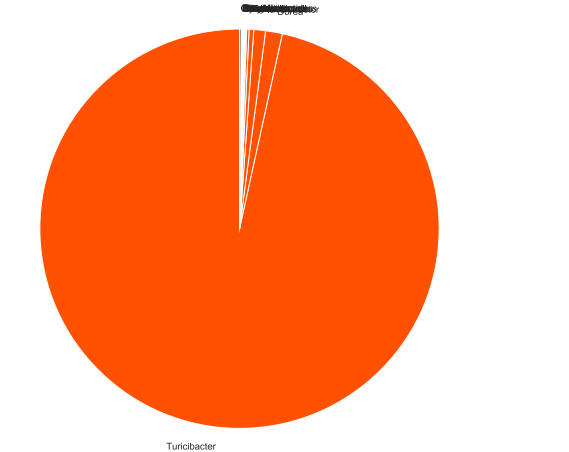

Image from: [https://commons.wikimedia.org/wiki/File%3AHouse\\_mouse.jpg](https://commons.wikimedia.org/wiki/File%3AHouse_mouse.jpg)

# Topic #48

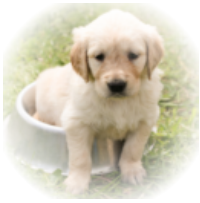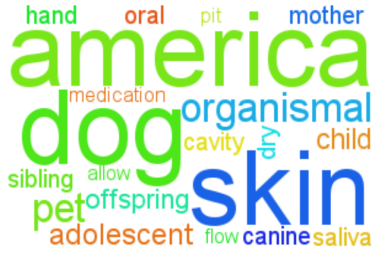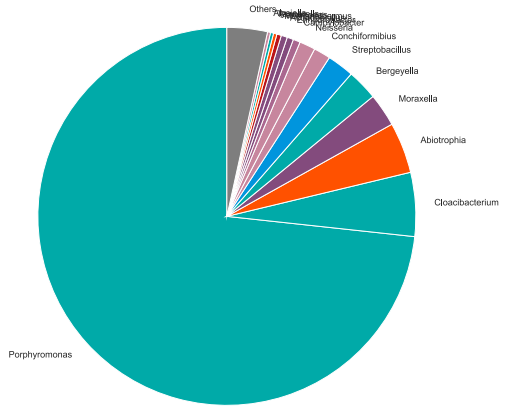

Image from: <https://pixabay.com/en/puppy-golden-retriever-dog-1207816/>

# Topic #49

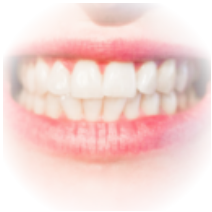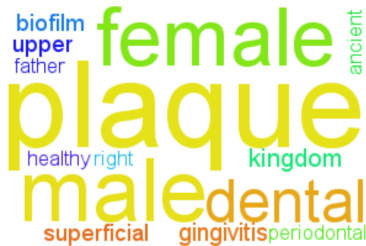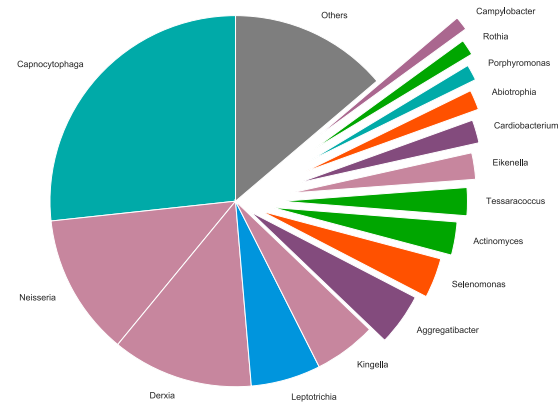

Image from: <https://pixabay.com/en/teeth-dentist-dental-mouth-tooth-1652976/>

# Topic #50

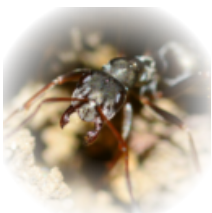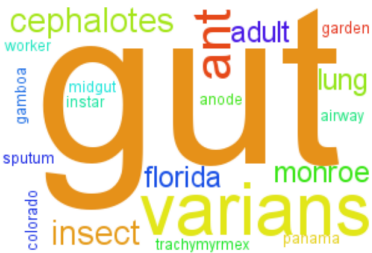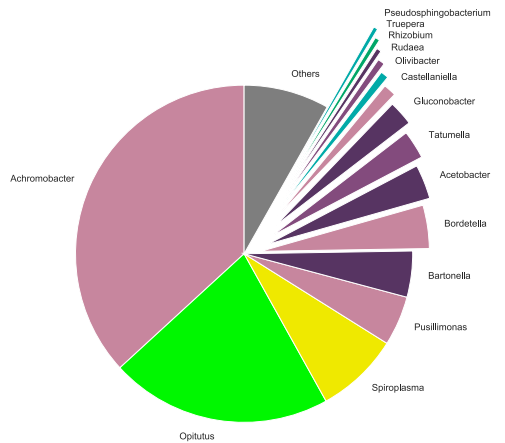

Image from: <https://pixabay.com/en/insects-serviformica-cunicularia-827787/>

# Topic #51

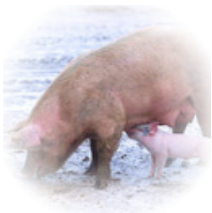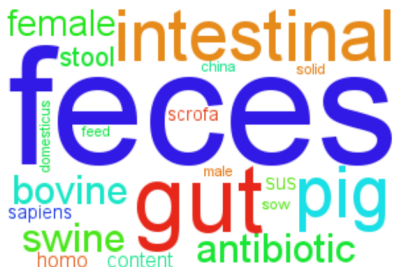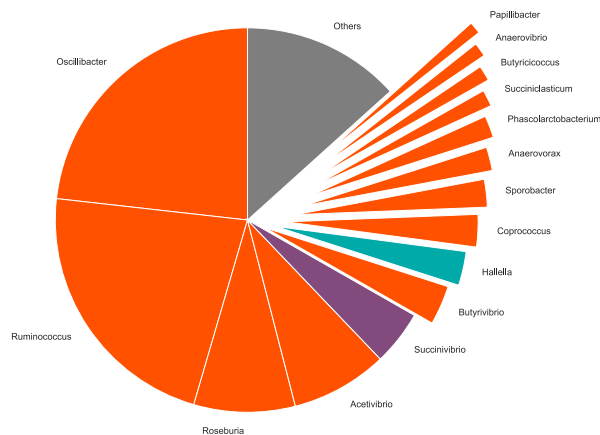

Image from: [https://commons.wikimedia.org/wiki/File:Porcine\\_feces.jpg](https://commons.wikimedia.org/wiki/File:Porcine_feces.jpg)

# Topic #52

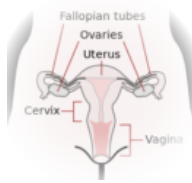

vaginal  
fornix vagina introitus  
female  
african american

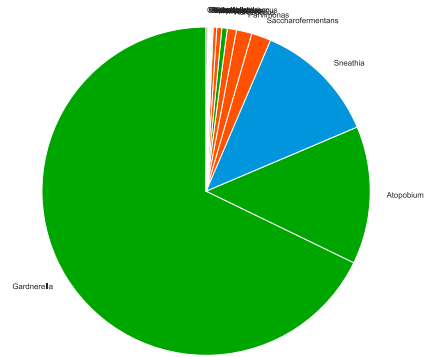

Image from:

[https://commons.wikimedia.org/wiki/File%3AScheme\\_female\\_reproductive\\_system-en.svg](https://commons.wikimedia.org/wiki/File%3AScheme_female_reproductive_system-en.svg)

# Topic #53

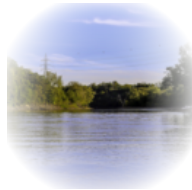

river wastewater  
sediment fresh surface lake winter aquatic  
water  
minnesota geographic influent  
freshwater  
biofilm sewage pollution coast urban sewer

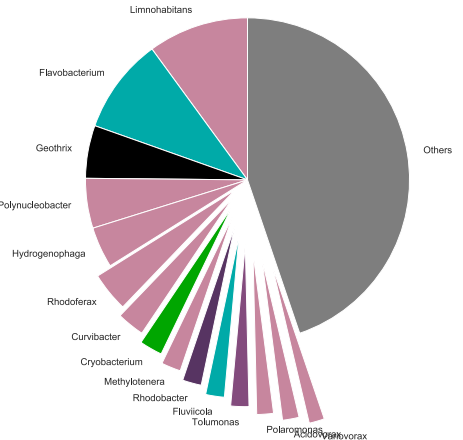

Image from:

<https://pixabay.com/en/mississippi-river-landscape-forest-958586/>

# Topic #54

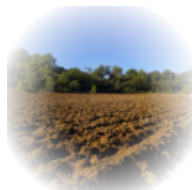

alfisol field map combustion  
grassland argentina temperate  
horizon dry  
soil  
maize plant loam florida fertilizer agricultural  
silt compost terrestrial  
canada

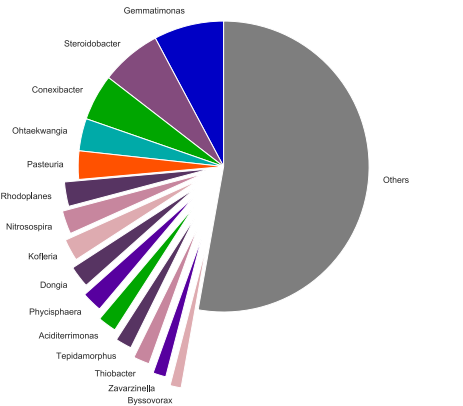

Image from:

<https://pixabay.com/en/tractor-labour-agricultural-machine-1732125/>

# Topic #55

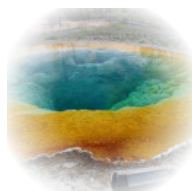

geothermal paddy digester soil hot  
anaerobic plant  
spring grind  
sludge reactor canada  
new contaminate aquifer  
sediment  
oil wastewater bioreactor archaeal

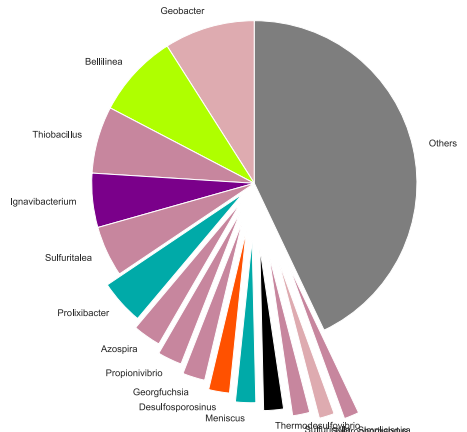

Image from:

[https://commons.wikimedia.org/wiki/File%3AThermal\\_hot\\_spring.jpg](https://commons.wikimedia.org/wiki/File%3AThermal_hot_spring.jpg)









# Topic #68

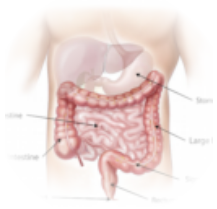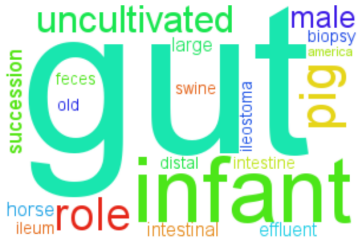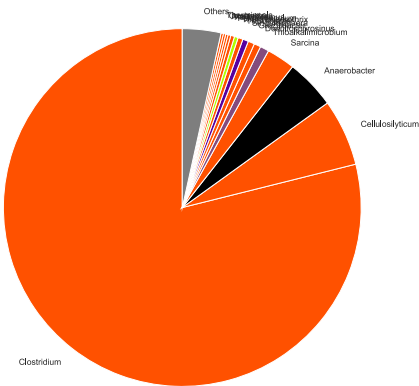

Image from: <https://pixabay.com/en/abdomen-intestine-large-small-1698565/>

# Topic #69

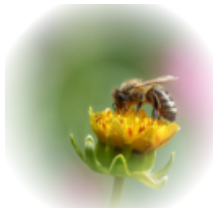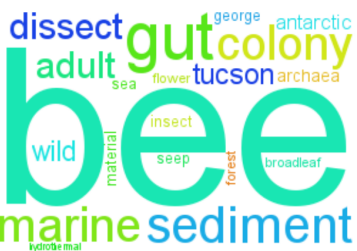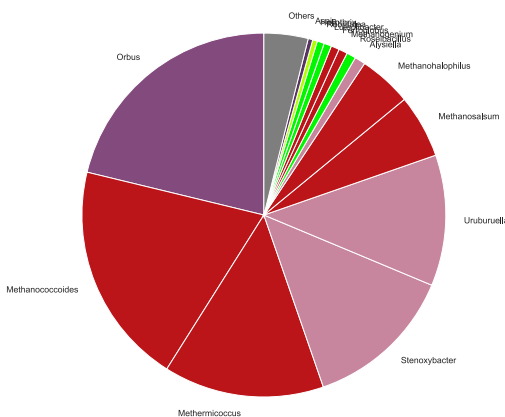

Image from: <https://pixabay.com/en/animal-insect-honey-bee-summer-1685865/>

# Topic #70

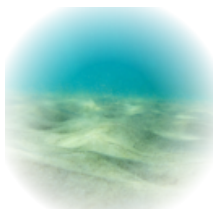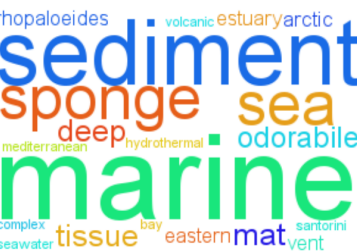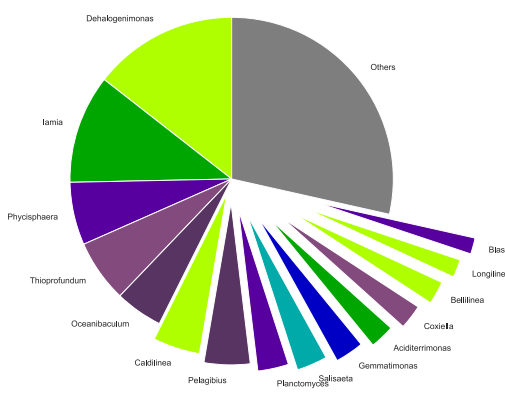

Image from: <https://pixabay.com/en/background-blue-floor-ocean-sand-17520/>

# Topic #71

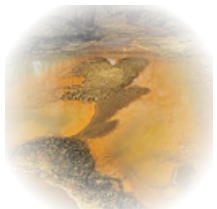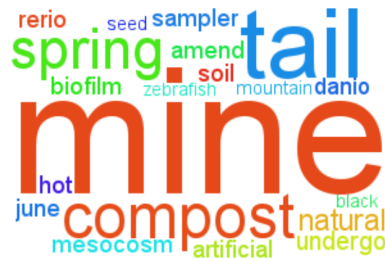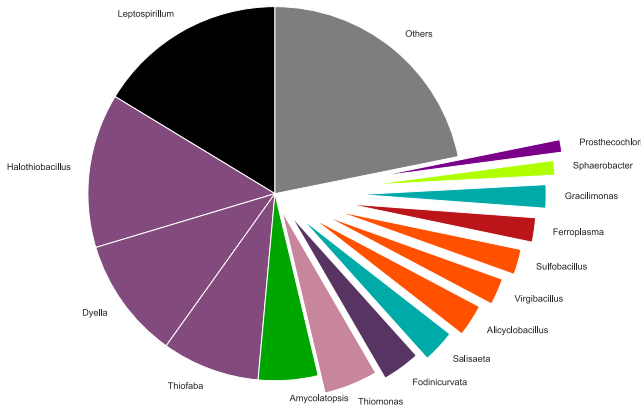

Image from: [https://commons.wikimedia.org/wiki/File%3AAlron\\_hydroxide\\_precipitate\\_in\\_stream.jpg](https://commons.wikimedia.org/wiki/File%3AAlron_hydroxide_precipitate_in_stream.jpg)





# Topic #76

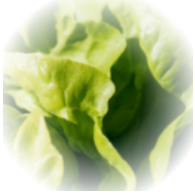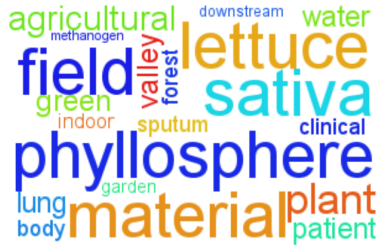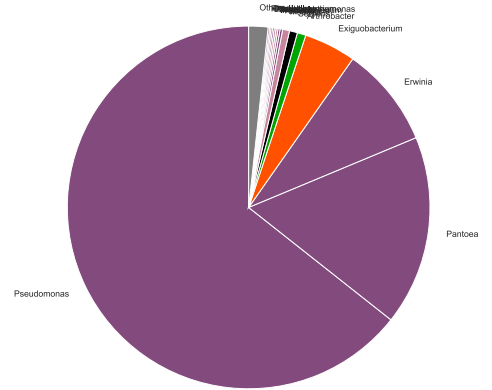

Image from: <https://pixabay.com/en/salad-green-leaf-lettuce-garden-1710328/>

# Topic #77

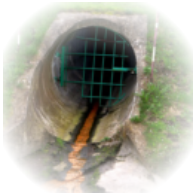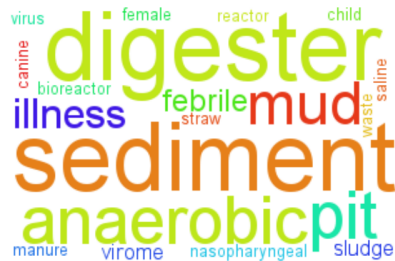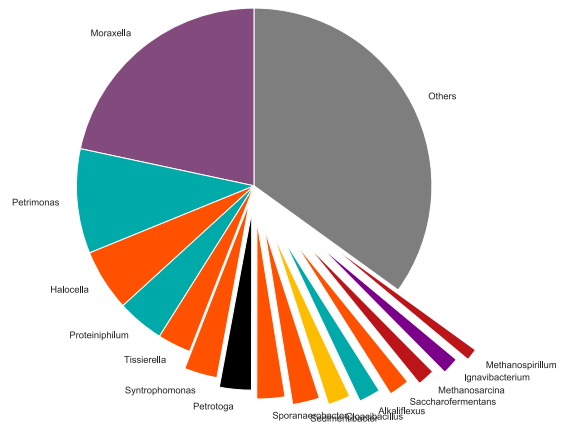

Image from: <https://pixabay.com/en/channel-sewage-sludge-unsanitary-1692671/>

# Topic #78

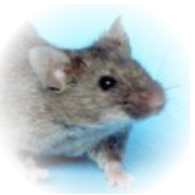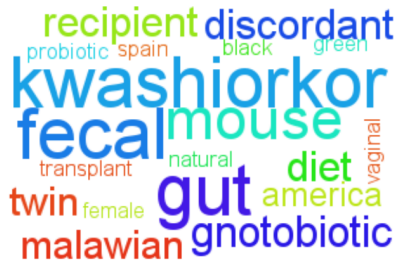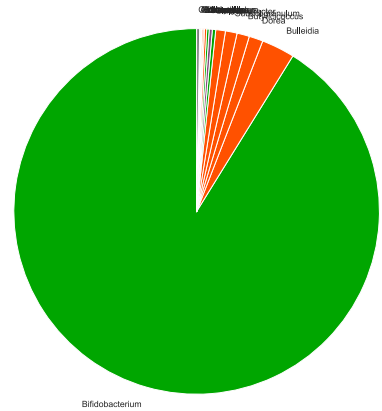

Image from: [https://commons.wikimedia.org/wiki/File%3AHouse\\_mouse.jpg](https://commons.wikimedia.org/wiki/File%3AHouse_mouse.jpg)

# Topic #79

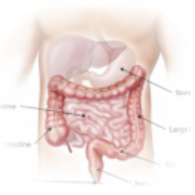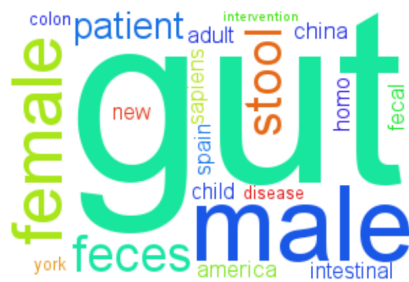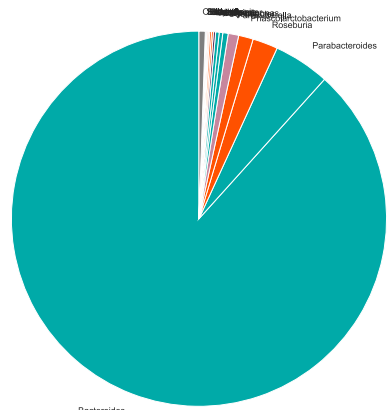

Image from: <https://pixabay.com/en/abdomen-intestine-large-small-1698565/>
