# Supplementary material for: Latent environment allocation of microbial community data
Source: PubMed Central journal article supplement (PMC6005635; doi:10.1371/journal.pcbi.1006143), 2018-06-06

**A**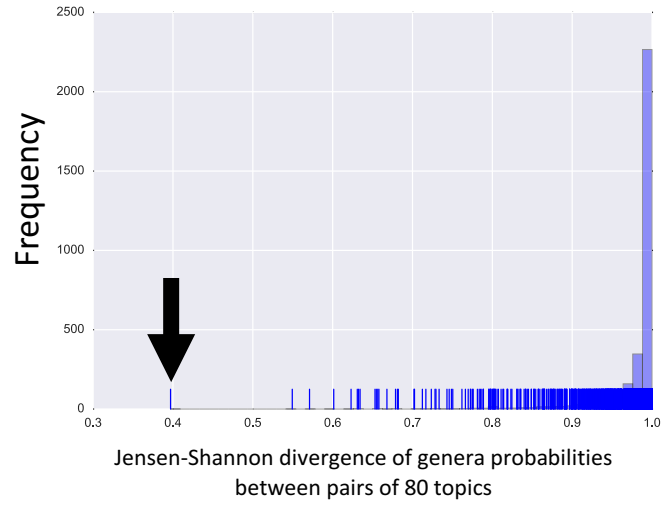**B**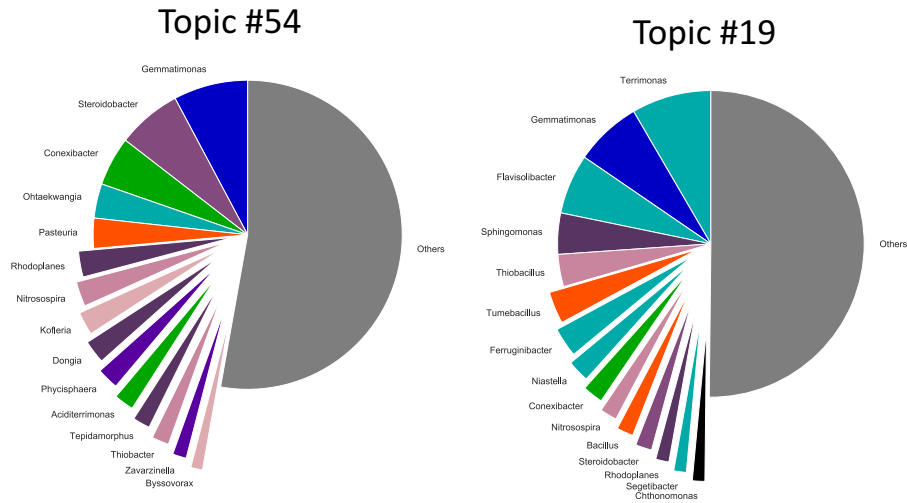**C**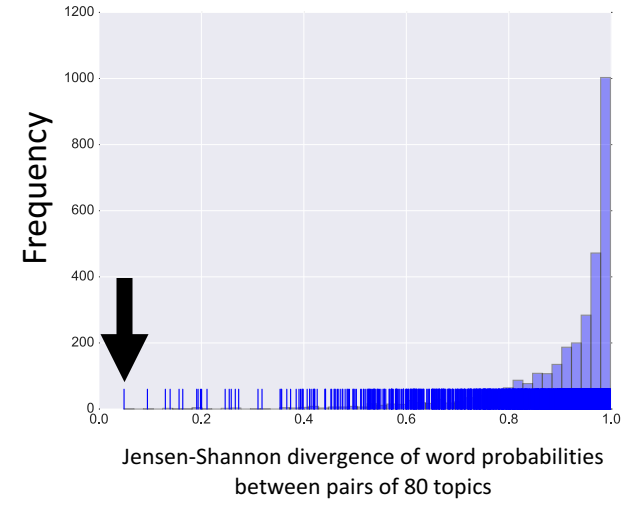**D**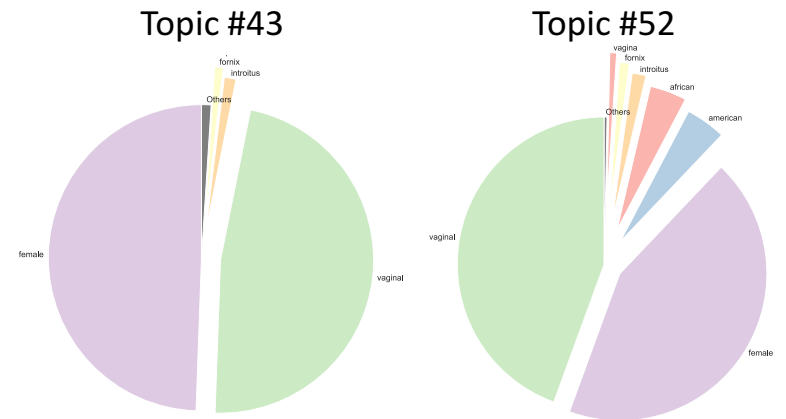

Supplement: pcbi.1006143.s006.pdf [file pcbi.1006143.s006.pdf]
