# Supplementary material for: Latent environment allocation of microbial community data
Source: PubMed Central journal article supplement (PMC6005635; doi:10.1371/journal.pcbi.1006143), 2018-06-06

P(Gut-associated words ("gut") | topic)

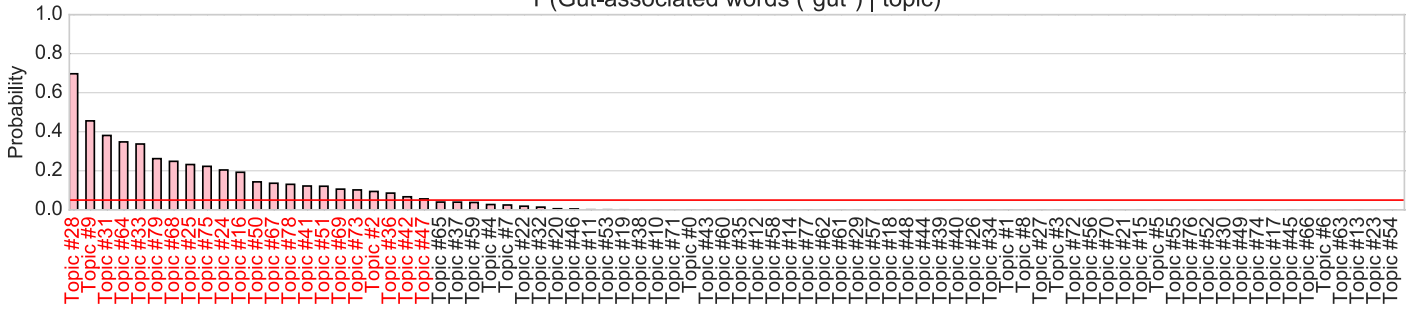

P(Oral cavity-associated words ("oral", "cavity", "dental", "plaque", "gingiva", "tonsil", "saliva") | topic)

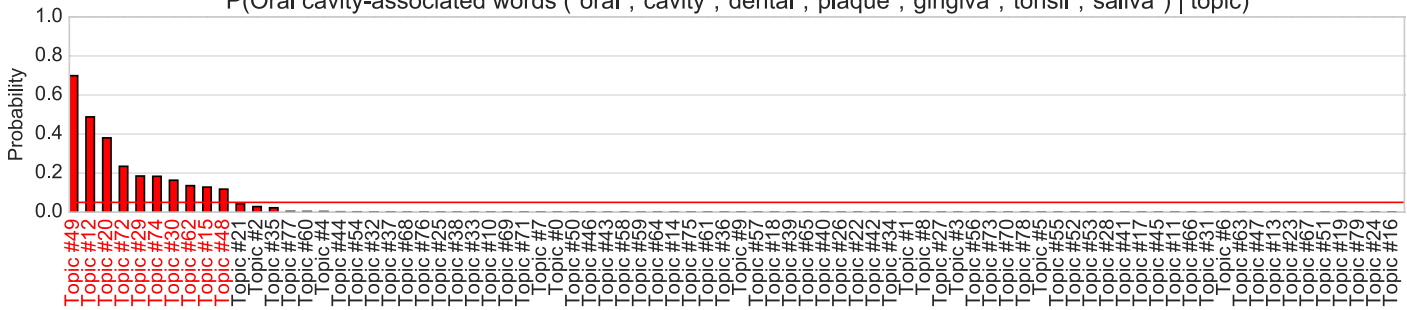

P(Skin-associated words ("skin") | topic)

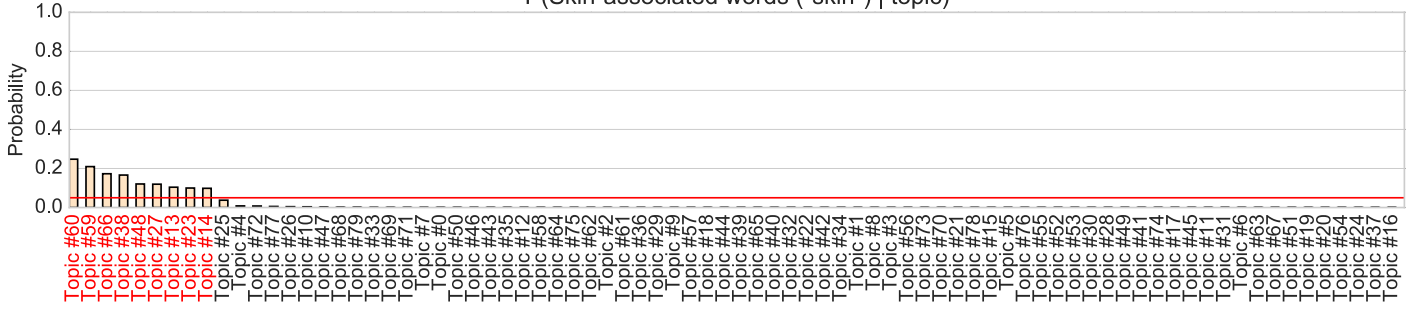

P(Vagina-associated words ("vaginal", "vagina") | topic)

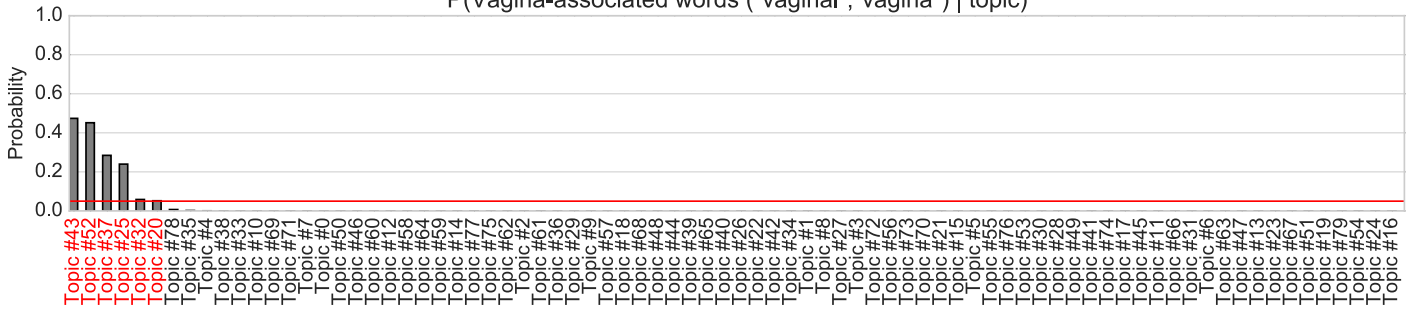

Supplement: pcbi.1006143.s008.pdf [file pcbi.1006143.s008.pdf]
