# Supplementary material for: Latent environment allocation of microbial community data
Source: PubMed Central journal article supplement (PMC6005635; doi:10.1371/journal.pcbi.1006143), 2018-06-06
Supplement: pcbi.1006143.s010.pdf [file pcbi.1006143.s010.pdf]

A

# All samples

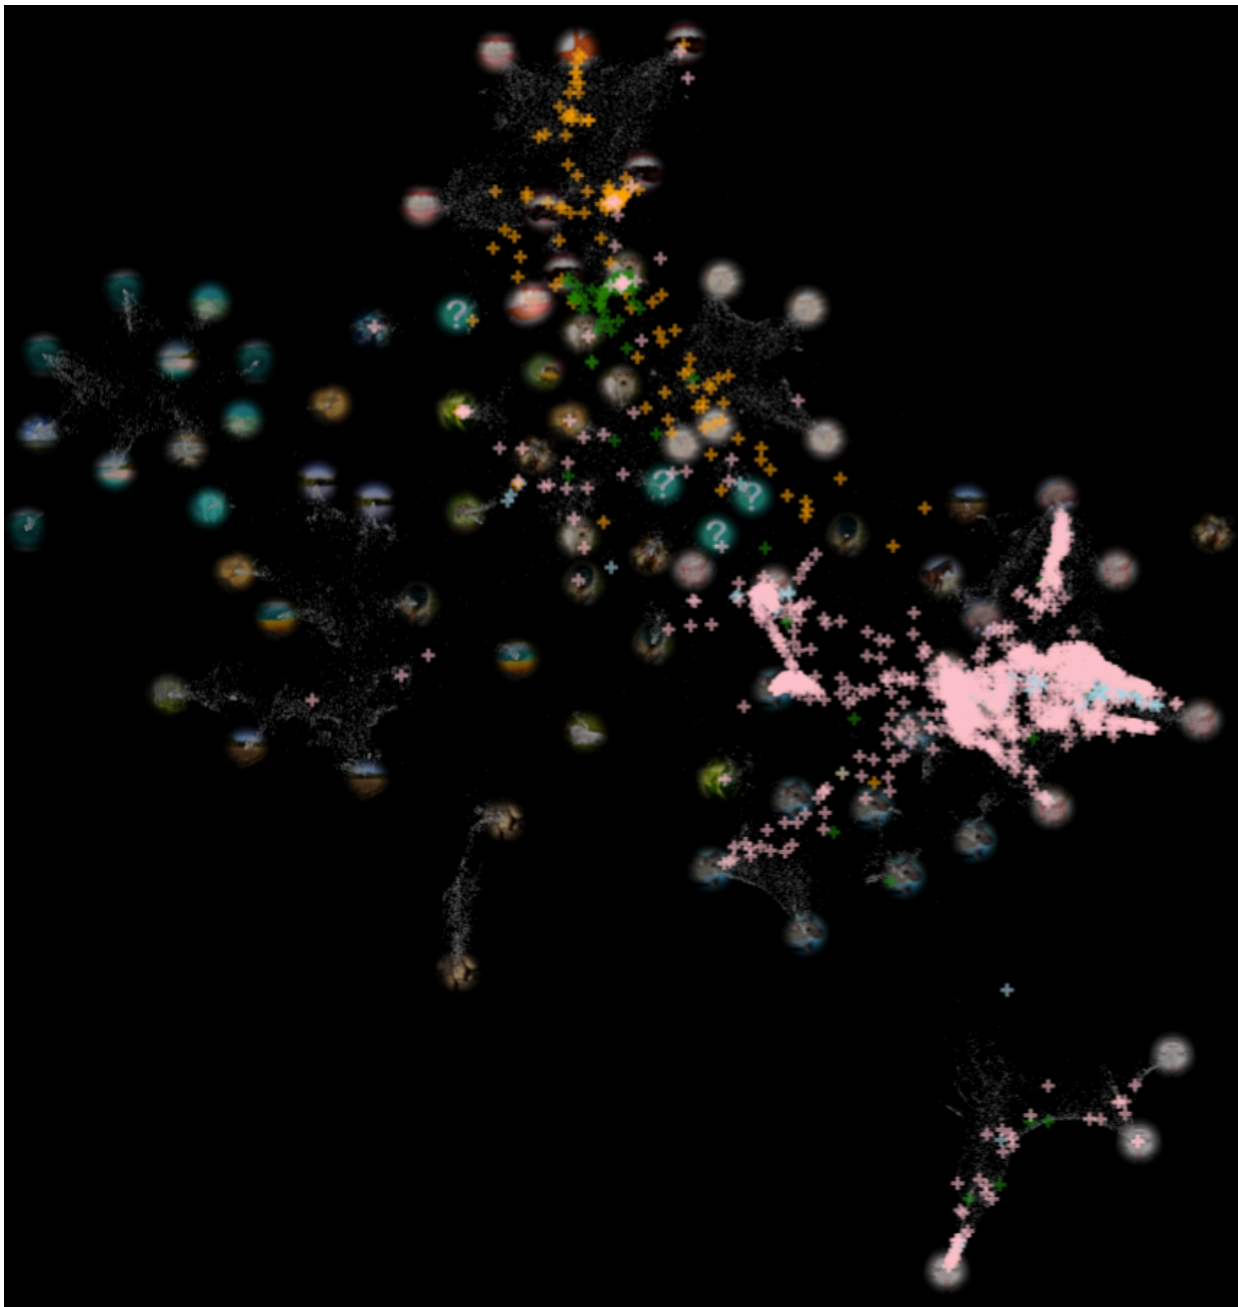

-  Human stool
-  Chemostat
-  Artificial fecal
-  Artificial oral

B

# Subject D2301

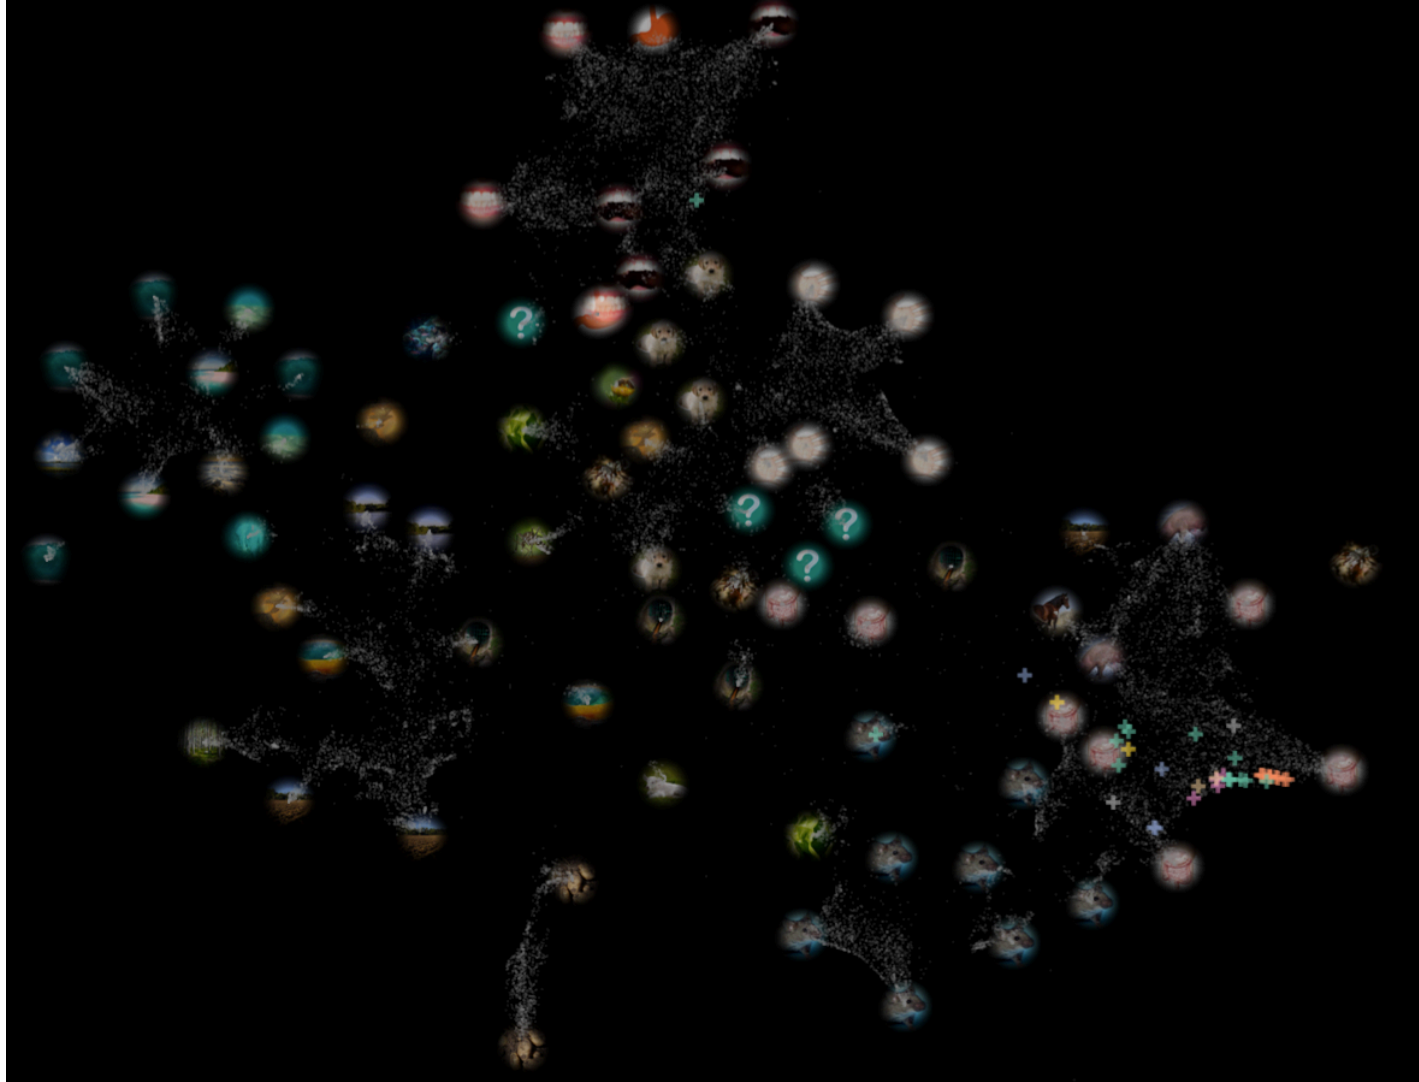

-  PowerSoil
-  PowerMag
-  QIAasympohony
-  Zymo
-  DNA-EZ RW02
-  Maxwell
-  QIAamp
-  Omega
-  Chemagic
-  Unknown

C

# Subject D2327

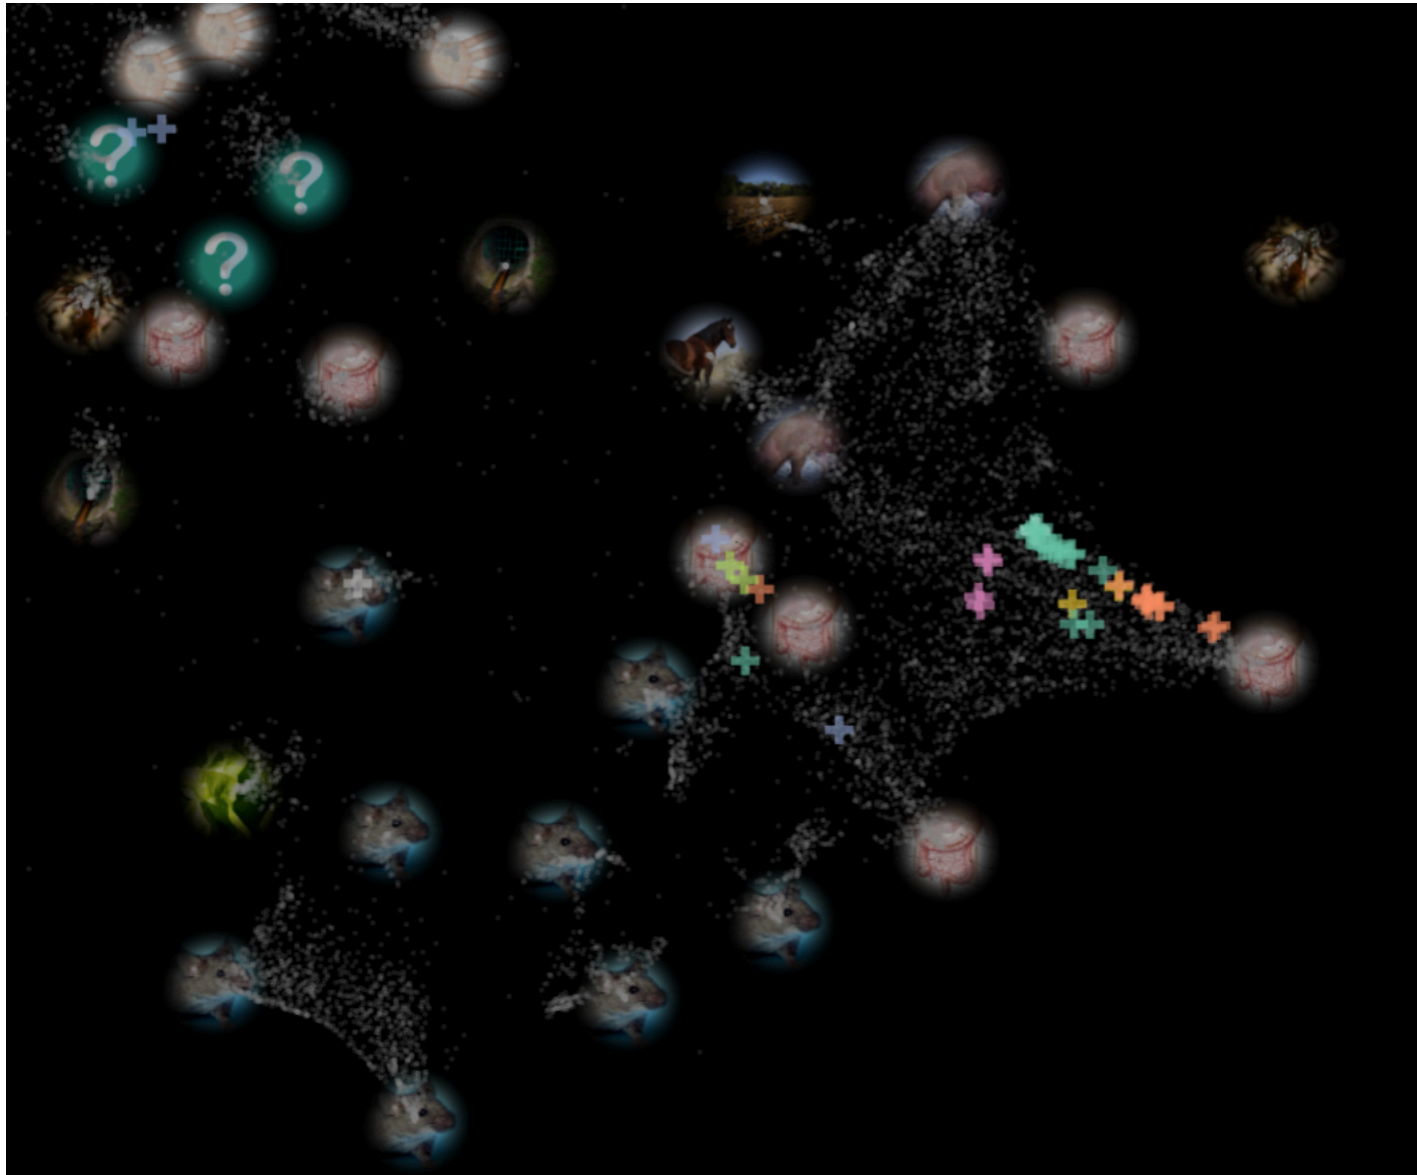

-  PowerSoil
-  PowerMag
-  QIA Symphony
-  Zymo
-  DNA-EZ RW02
-  Maxwell
-  QIAamp
-  Omega
-  Chemagic
-  Unknown

D

# Subject D2497

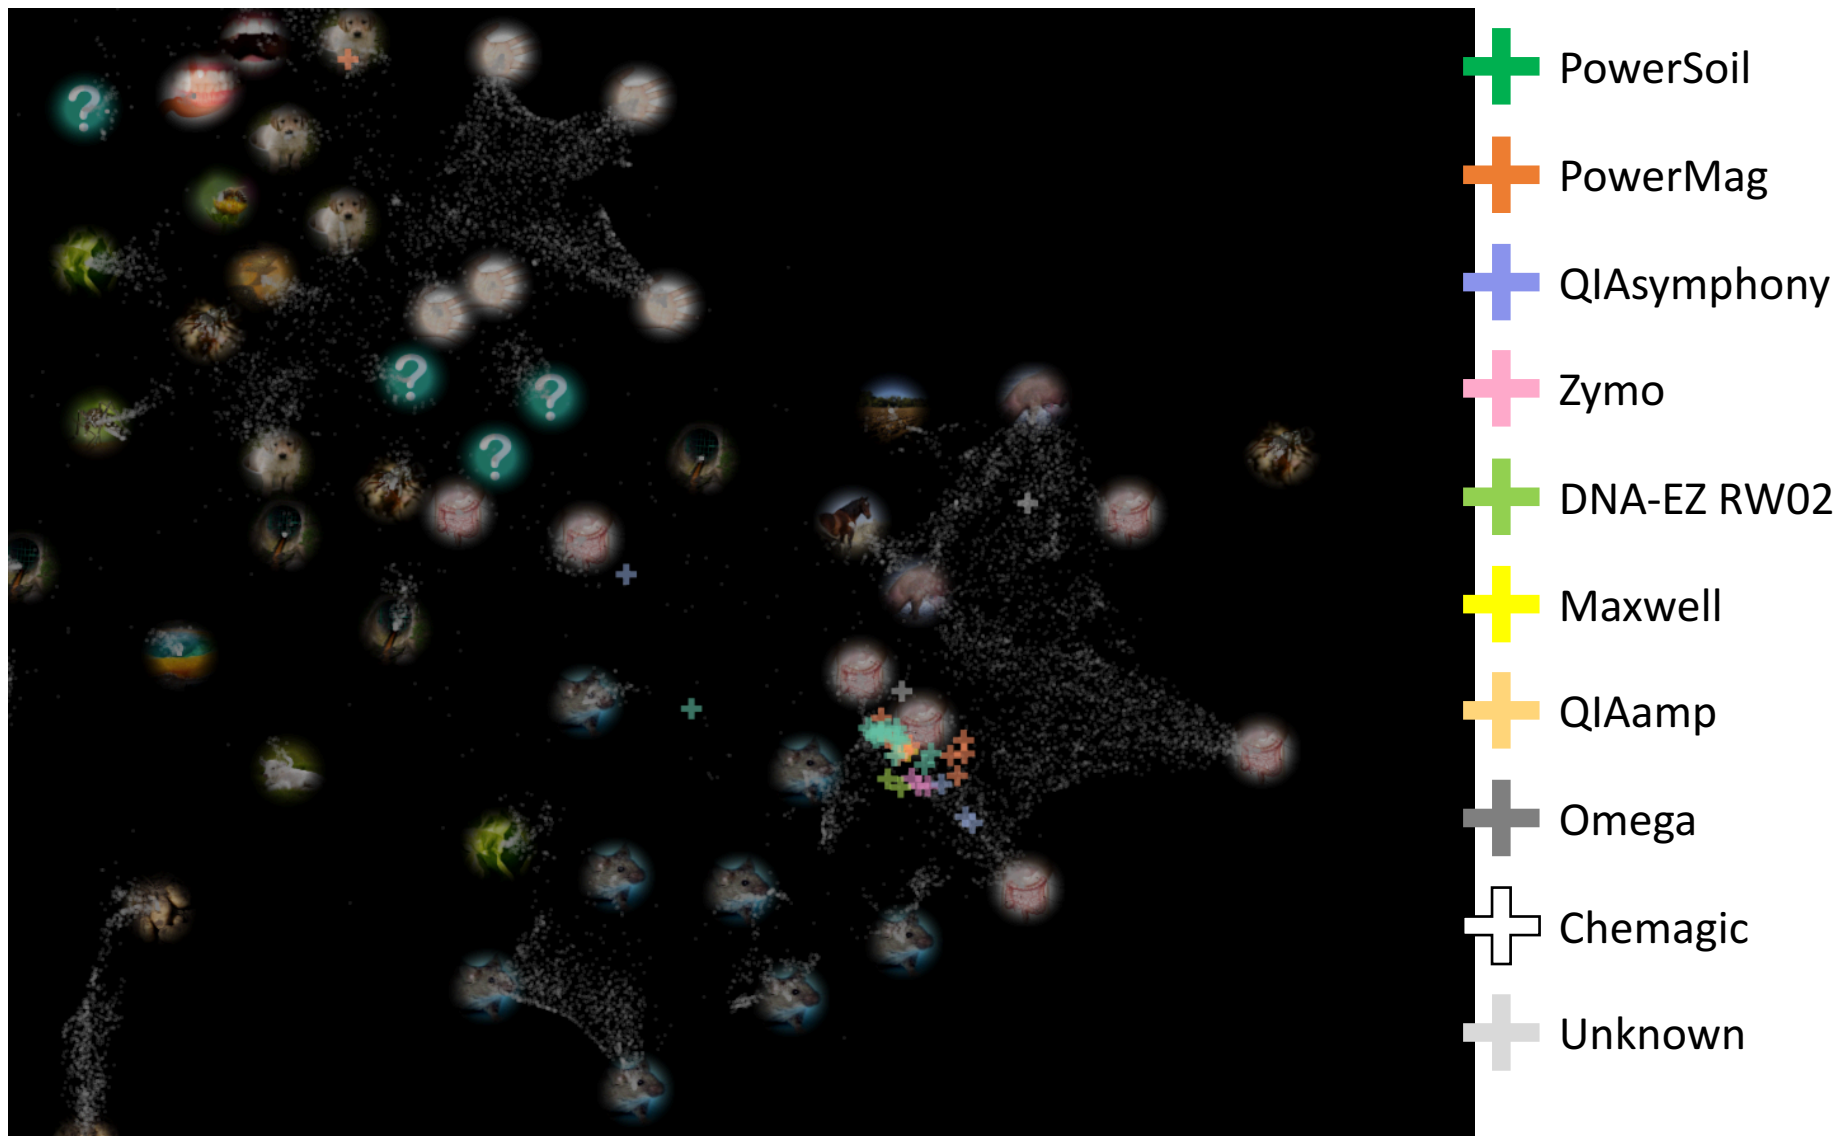

E

# Subject D2561

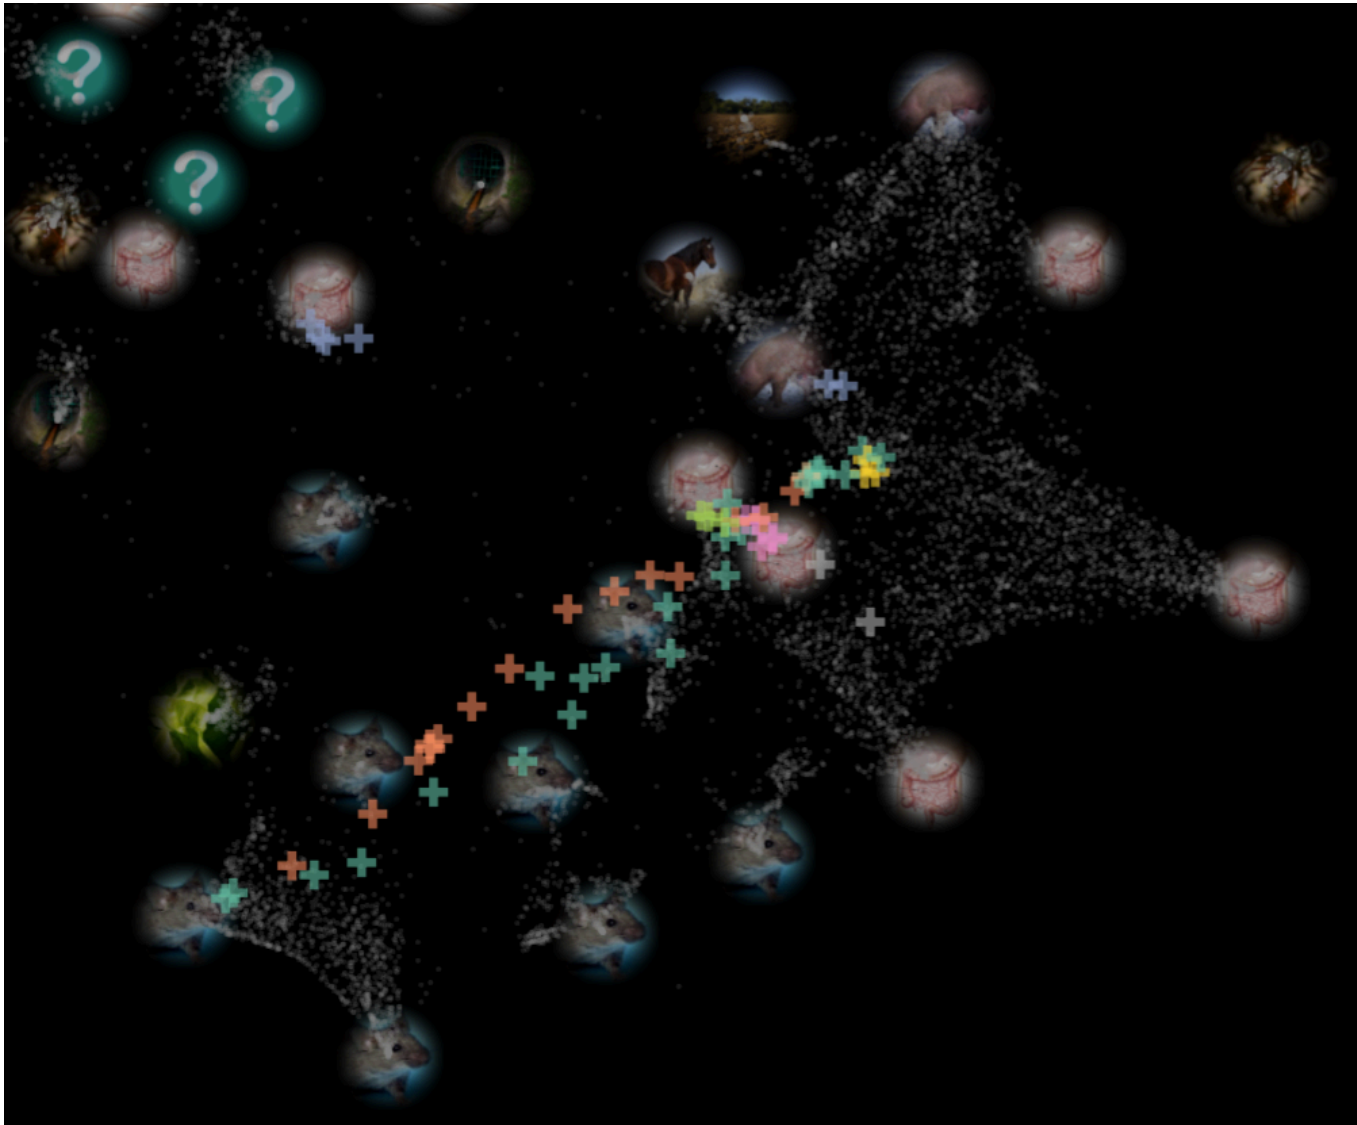

-  PowerSoil
-  PowerMag
-  QIAasympohony
-  Zymo
-  DNA-EZ RW02
-  Maxwell
-  QIAamp
-  Omega
-  Chemagic
-  Unknown

F

# Subject D2590

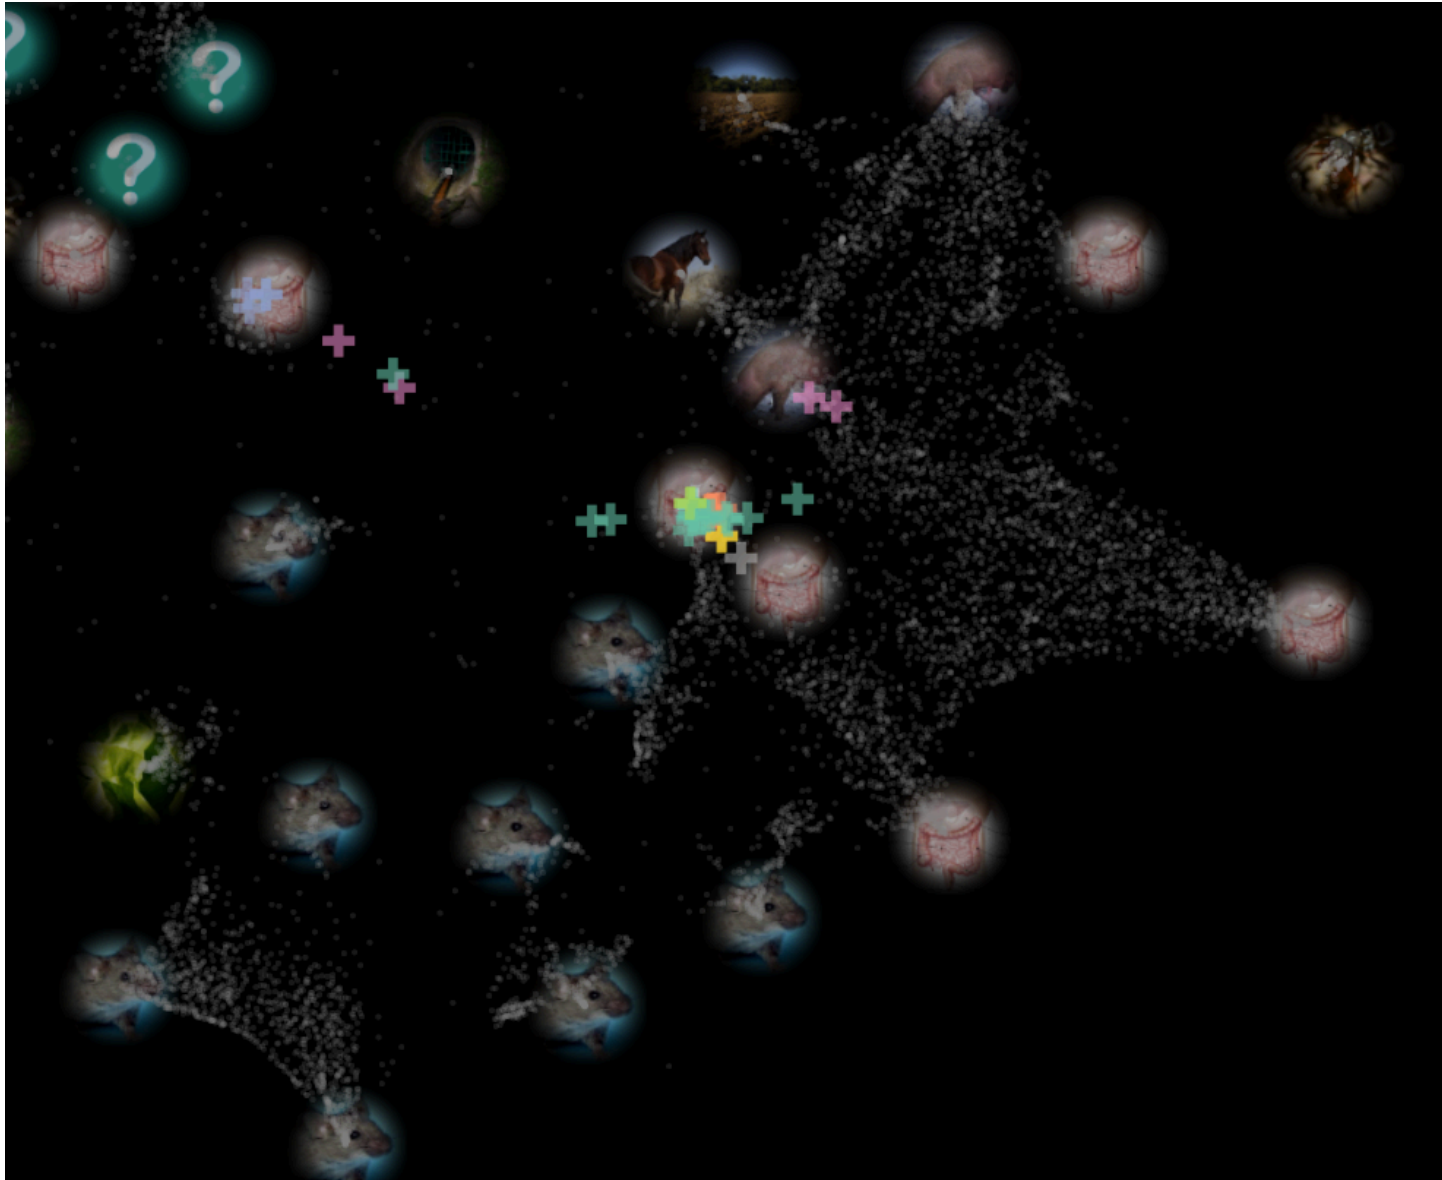

-  PowerSoil
-  PowerMag
-  QIAasympohony
-  Zymo
-  DNA-EZ RW02
-  Maxwell
-  QIAamp
-  Omega
-  Chemagic
-  Unknown

G

# Subject D2696

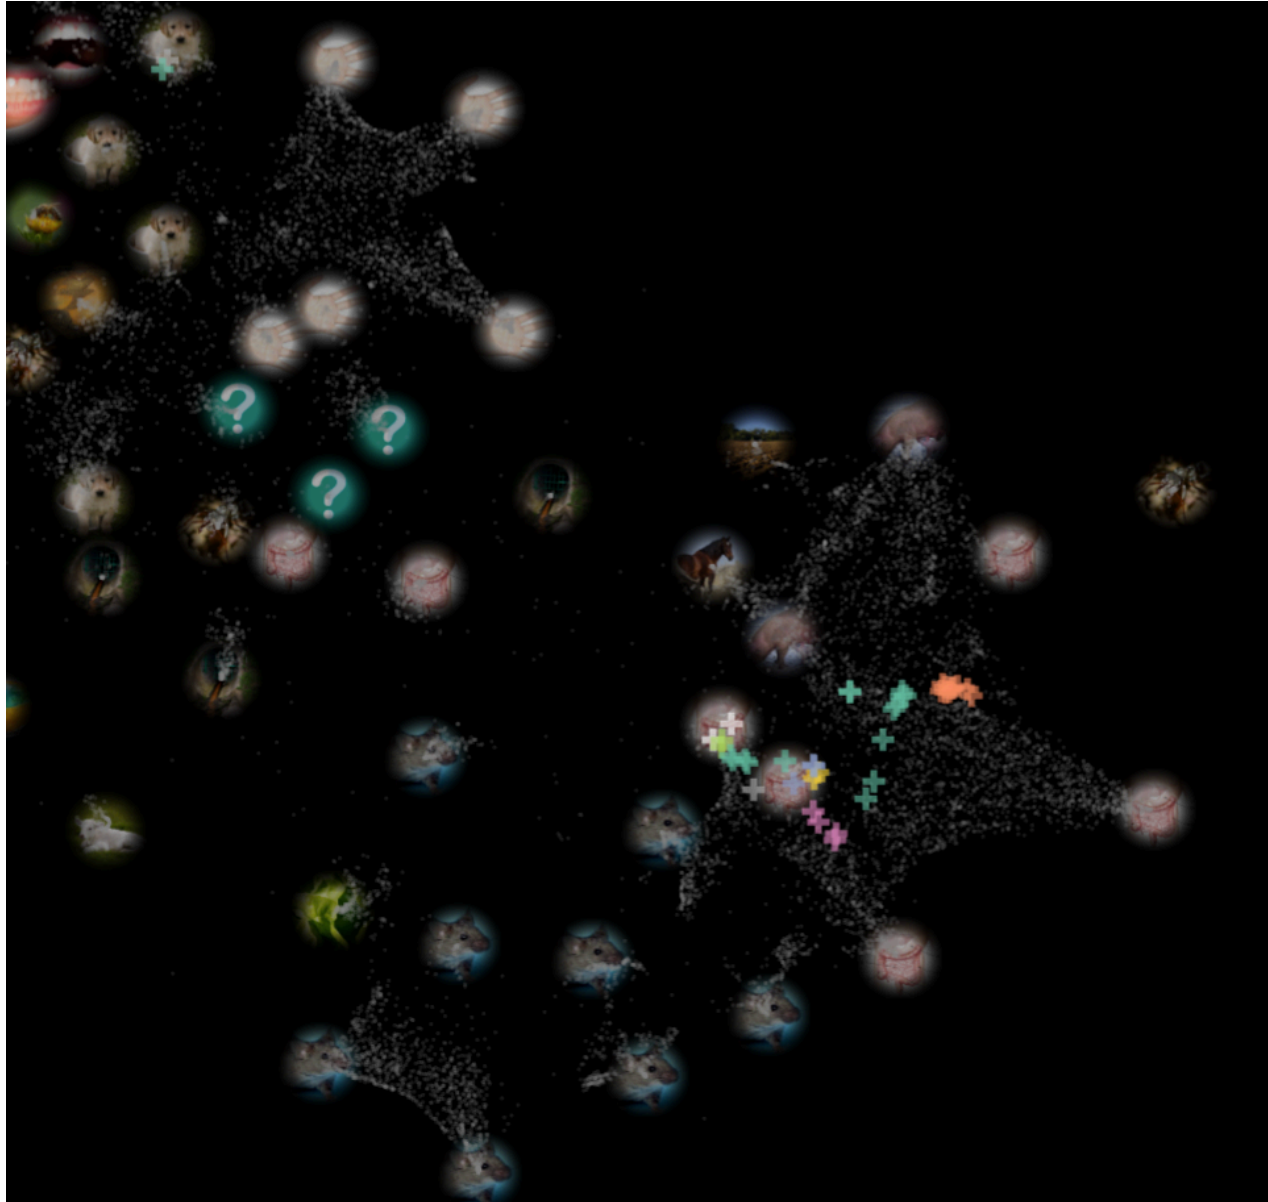

-  PowerSoil
-  PowerMag
-  QIA Symphony
-  Zymo
-  DNA-EZ RW02
-  Maxwell
-  QIAamp
-  Omega
-  Chemagic
-  Unknown

H

Subject D2698

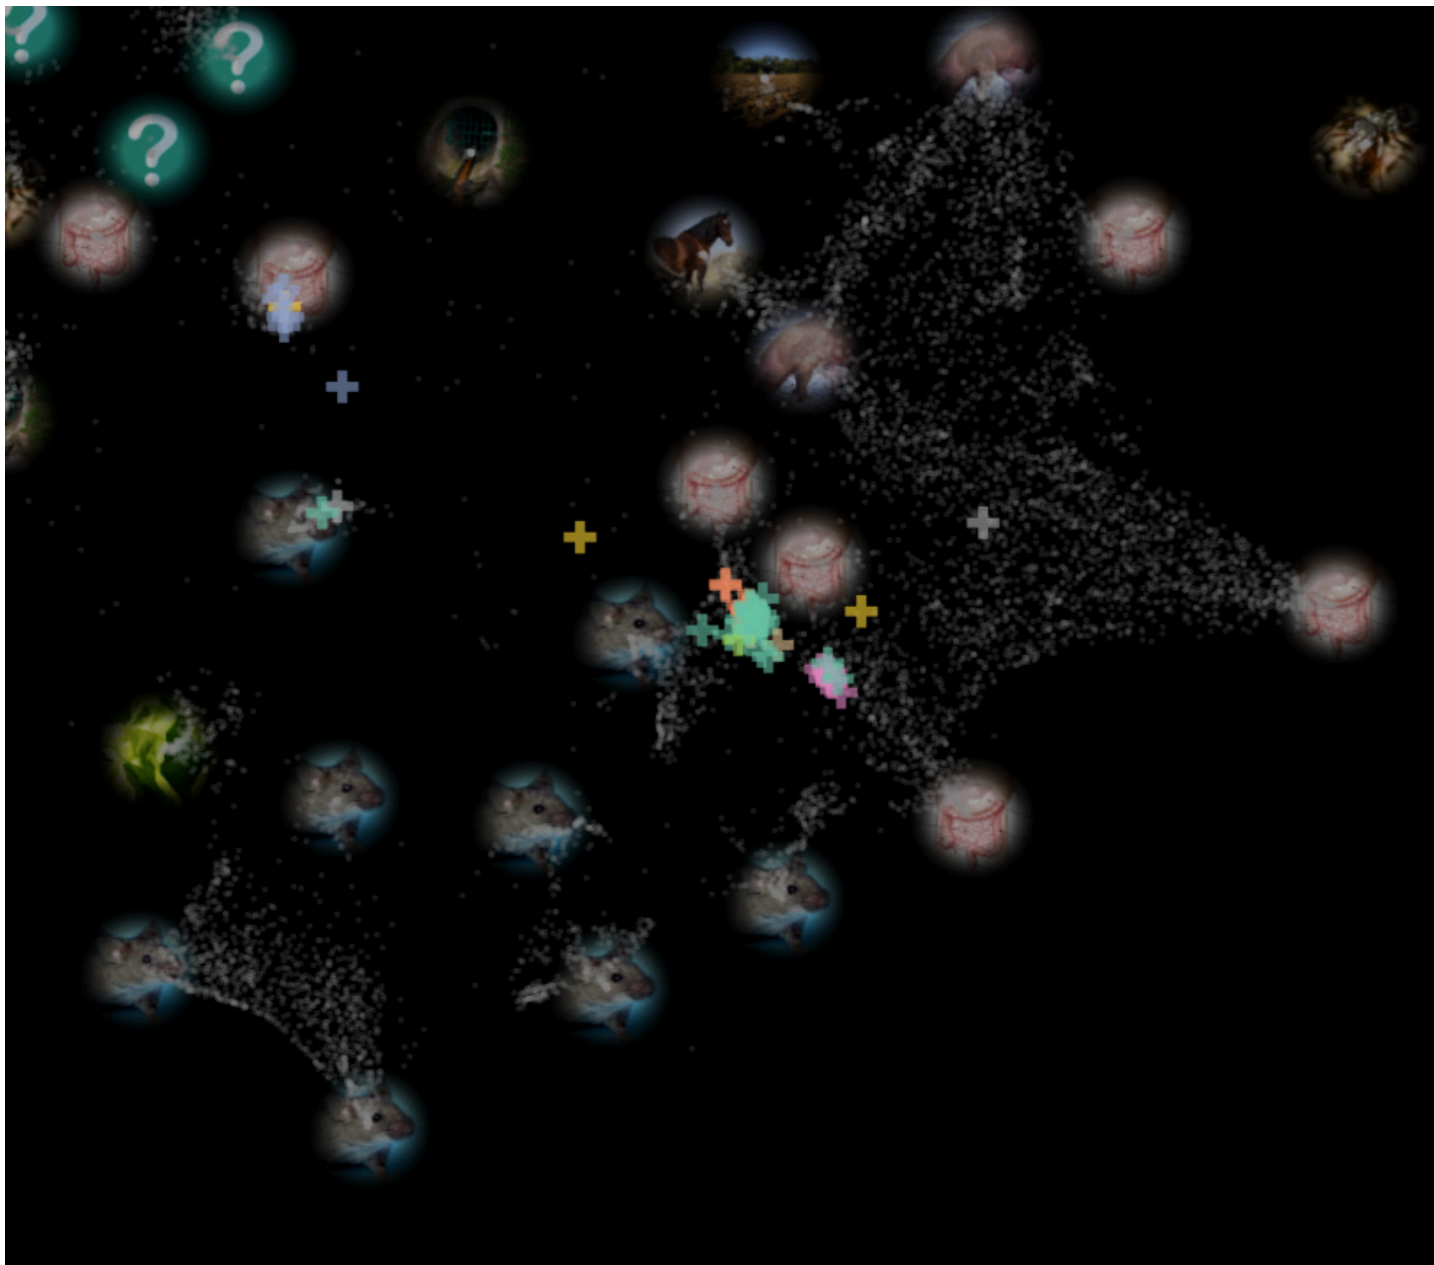

-  PowerSoil
-  PowerMag
-  QIAasympphony
-  Zymo
-  DNA-EZ RW02
-  Maxwell
-  QIAamp
-  Omega
-  Chemagic
-  Unknown



I

# Subject DZ15291

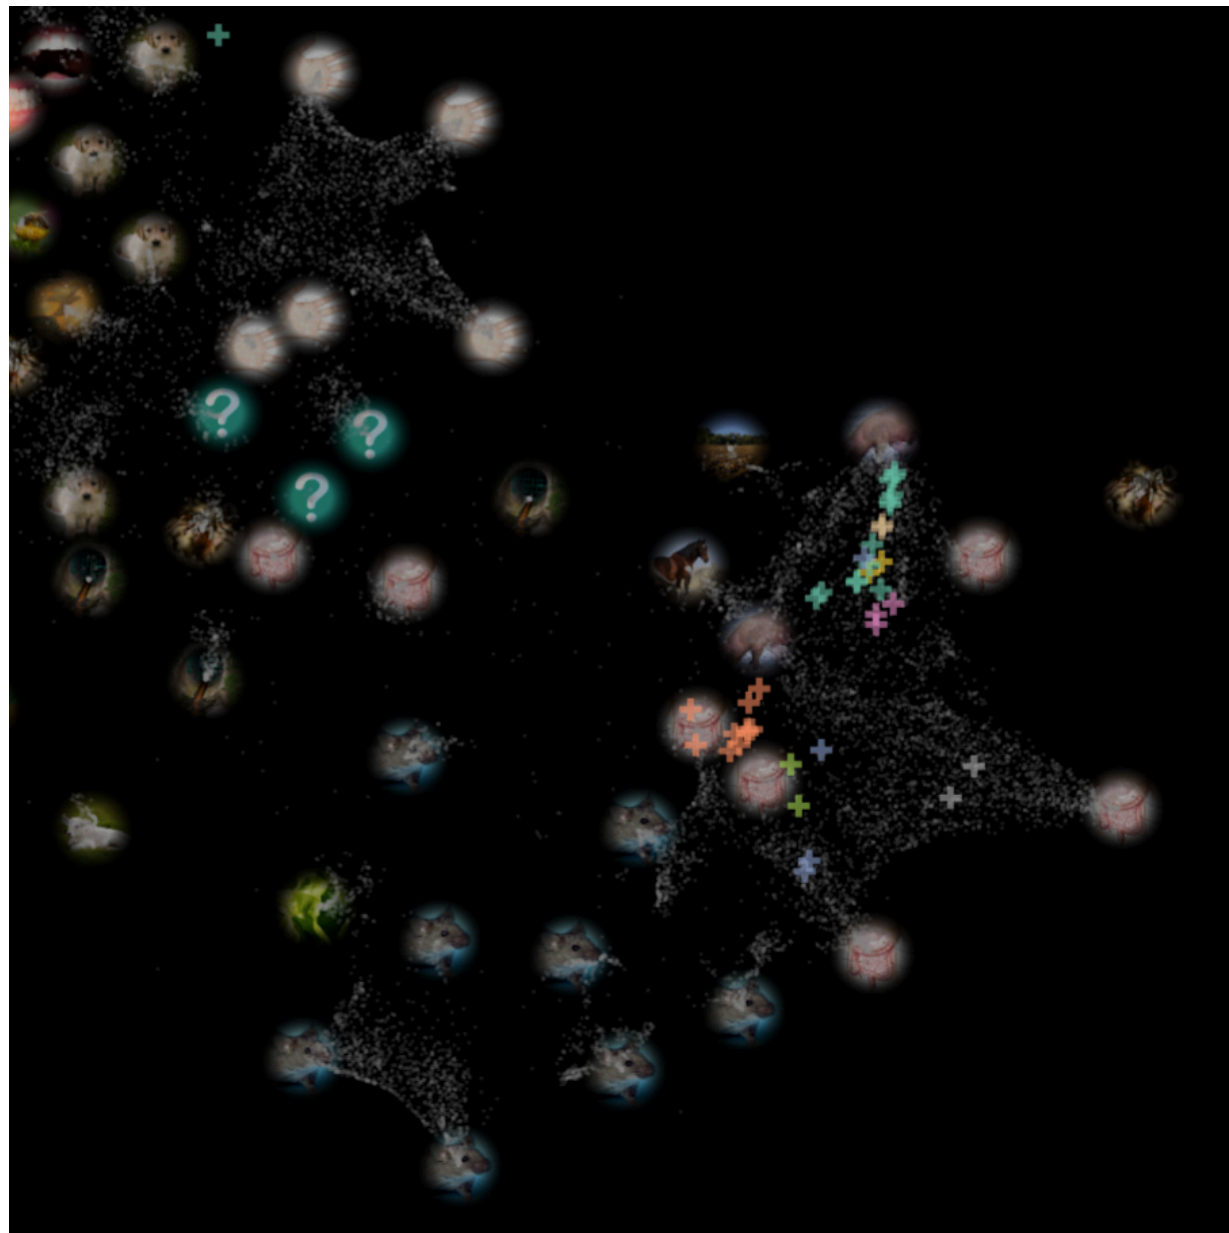

-  PowerSoil
-  PowerMag
-  QIAasympohony
-  Zymo
-  DNA-EZ RW02
-  Maxwell
-  QIAamp
-  Omega
-  Chemagic
-  Unknown

J

# Subject DZ15292

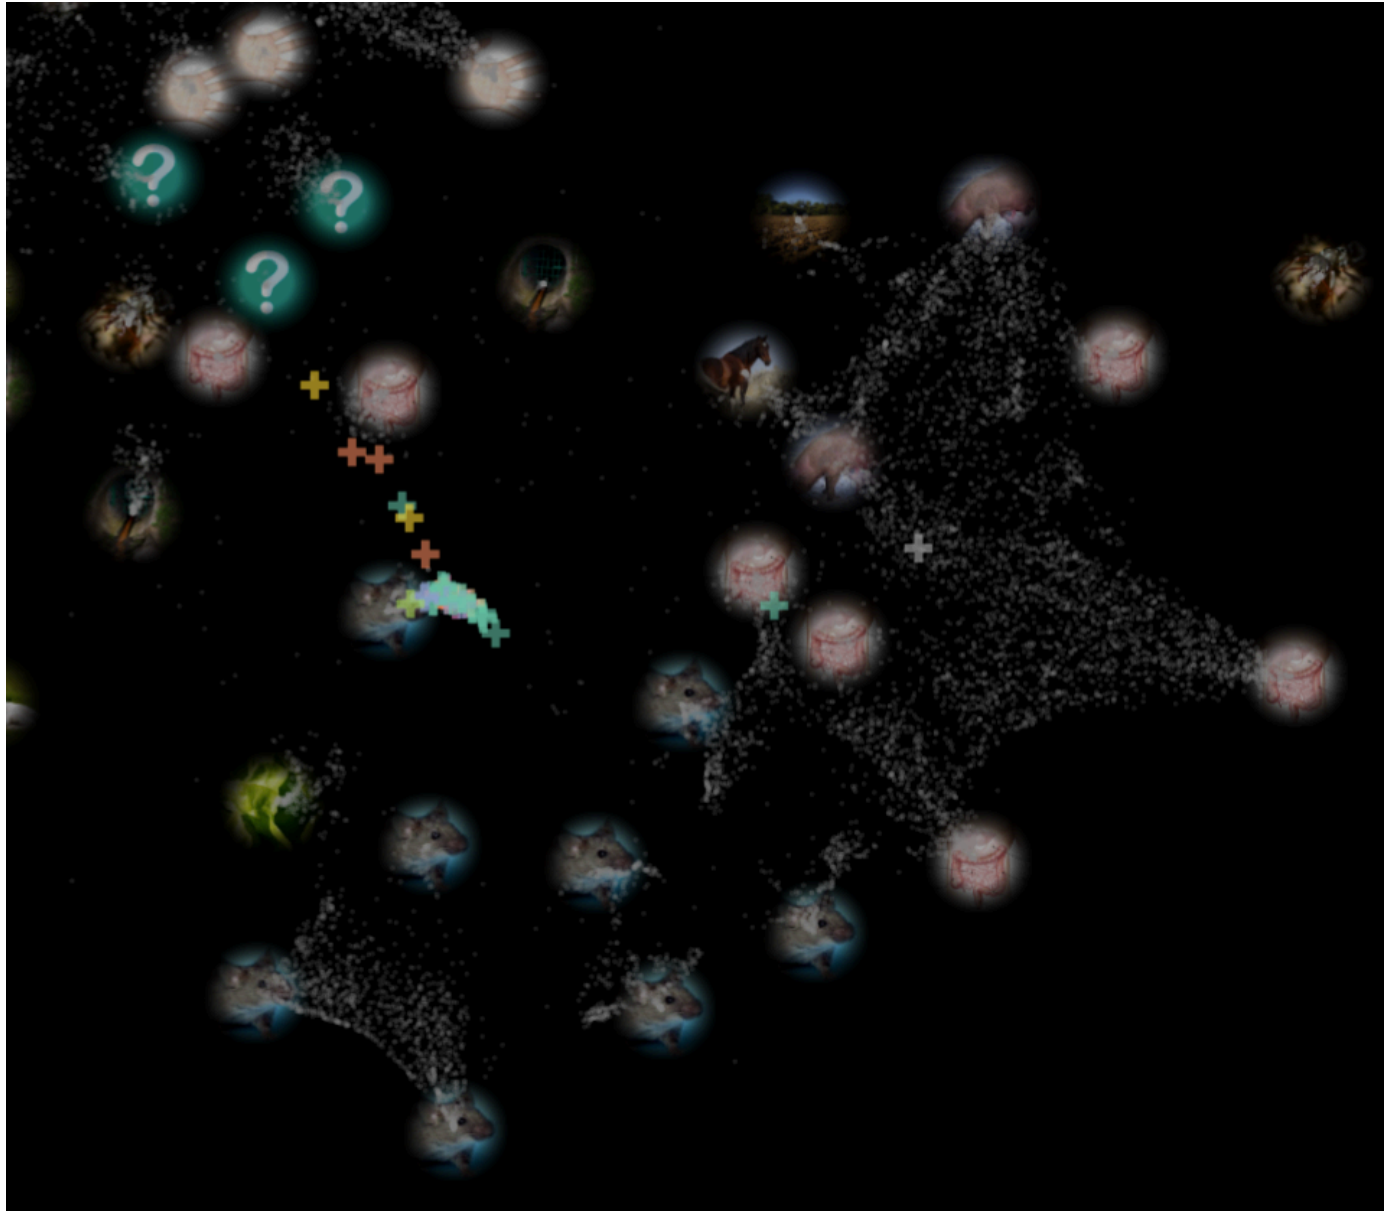

-  PowerSoil
-  PowerMag
-  QIA Symphony
-  Zymo
-  DNA-EZ RW02
-  Maxwell
-  QIAamp
-  Omega
-  Chemagic
-  Unknown

K

Subject DZ15293

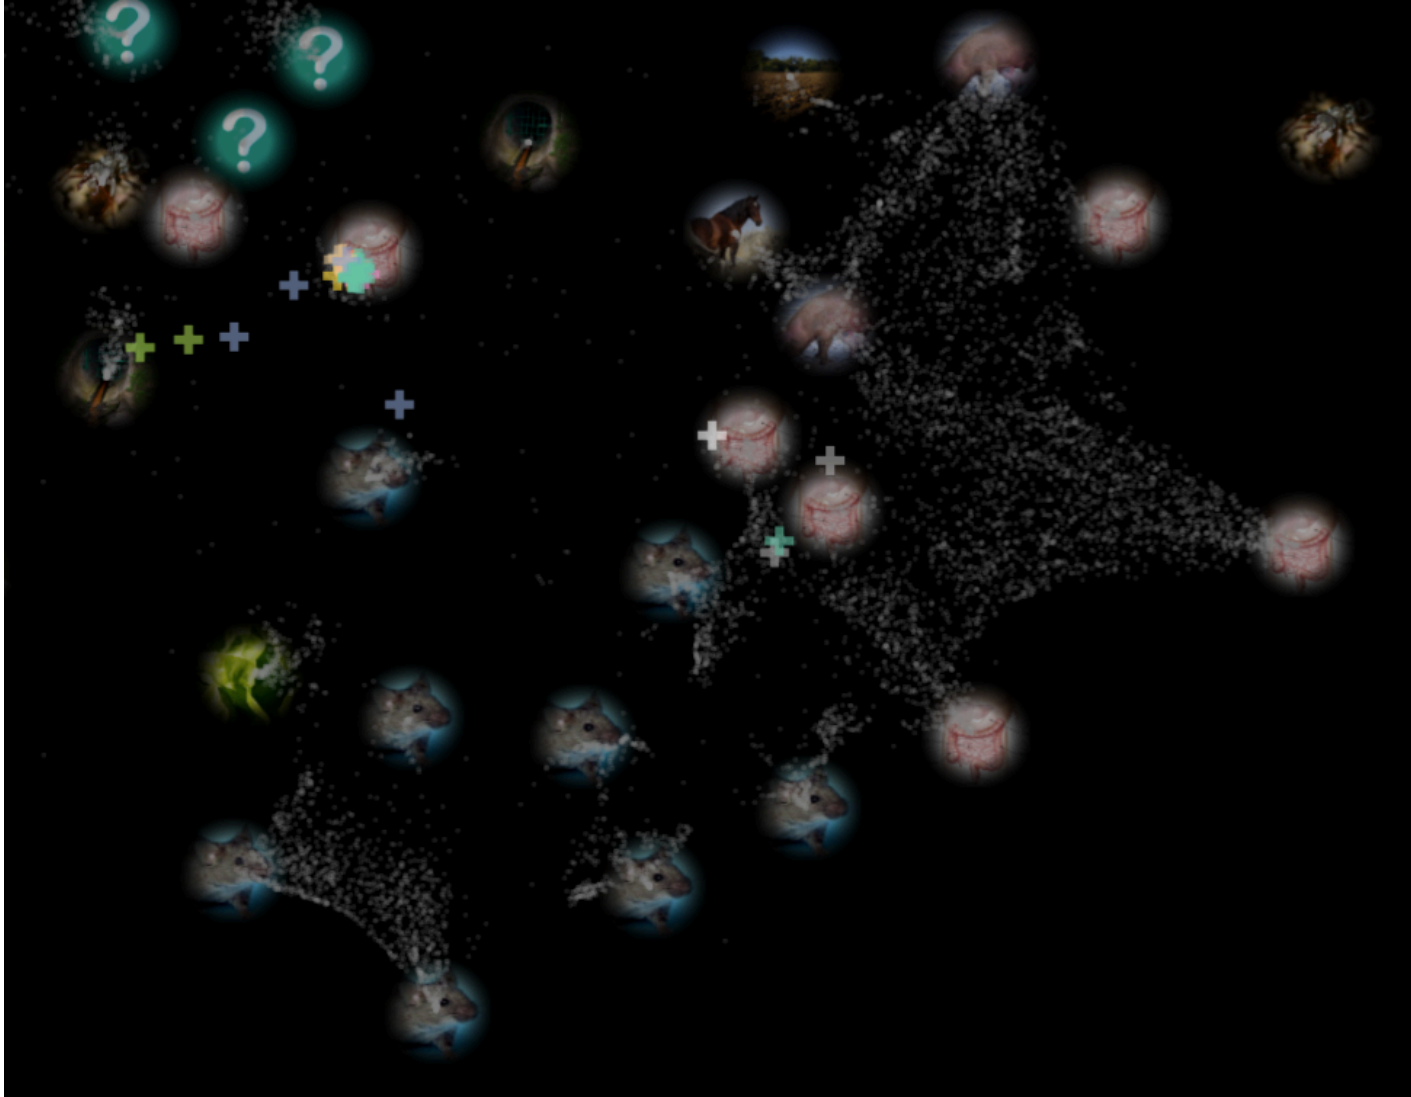

-  PowerSoil
-  PowerMag
-  QIAasympohony
-  Zymo
-  DNA-EZ RW02
-  Maxwell
-  QIAamp
-  Omega
-  Chemagic
-  Unknown

L

# Subject DZ15294

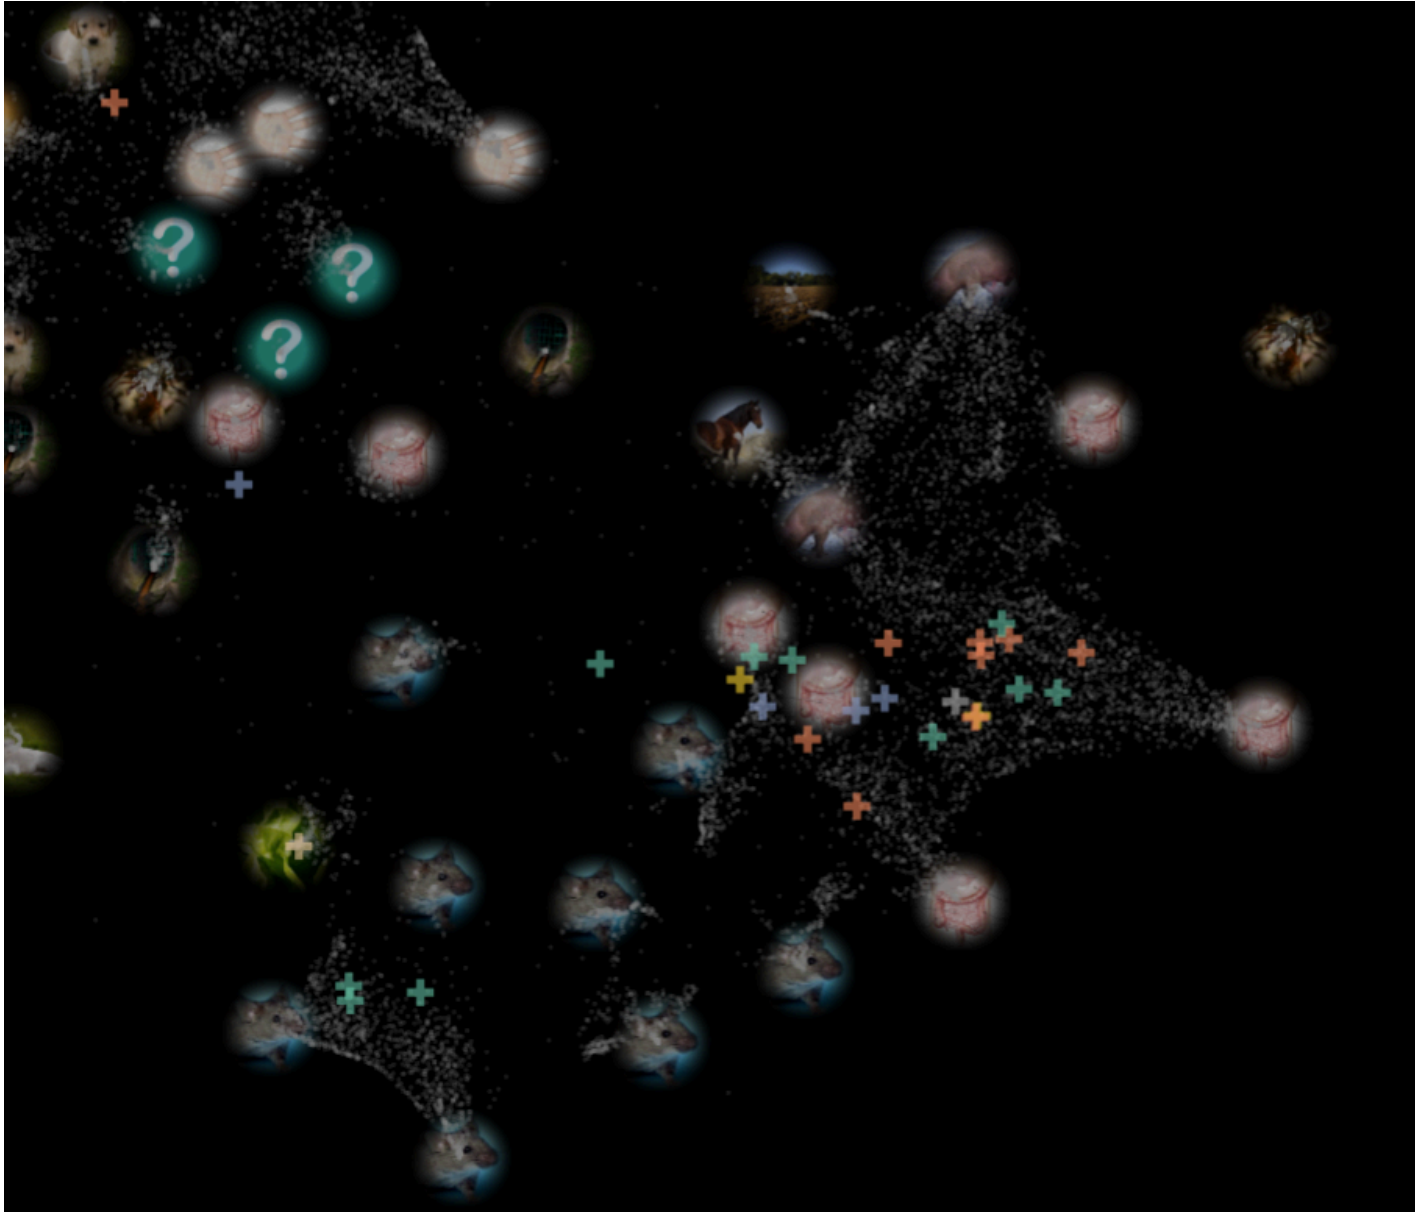

-  PowerSoil
-  PowerMag
-  QIAasympohony
-  Zymo
-  DNA-EZ RW02
-  Maxwell
-  QIAamp
-  Omega
-  Chemagic
-  Unknown

M

Subject DZ15295

-  PowerSoil
-  PowerMag
-  QIAasympohony
-  Zymo
-  DNA-EZ RW02
-  Maxwell
-  QIAamp
-  Omega
-  Chemagic
-  Unknown

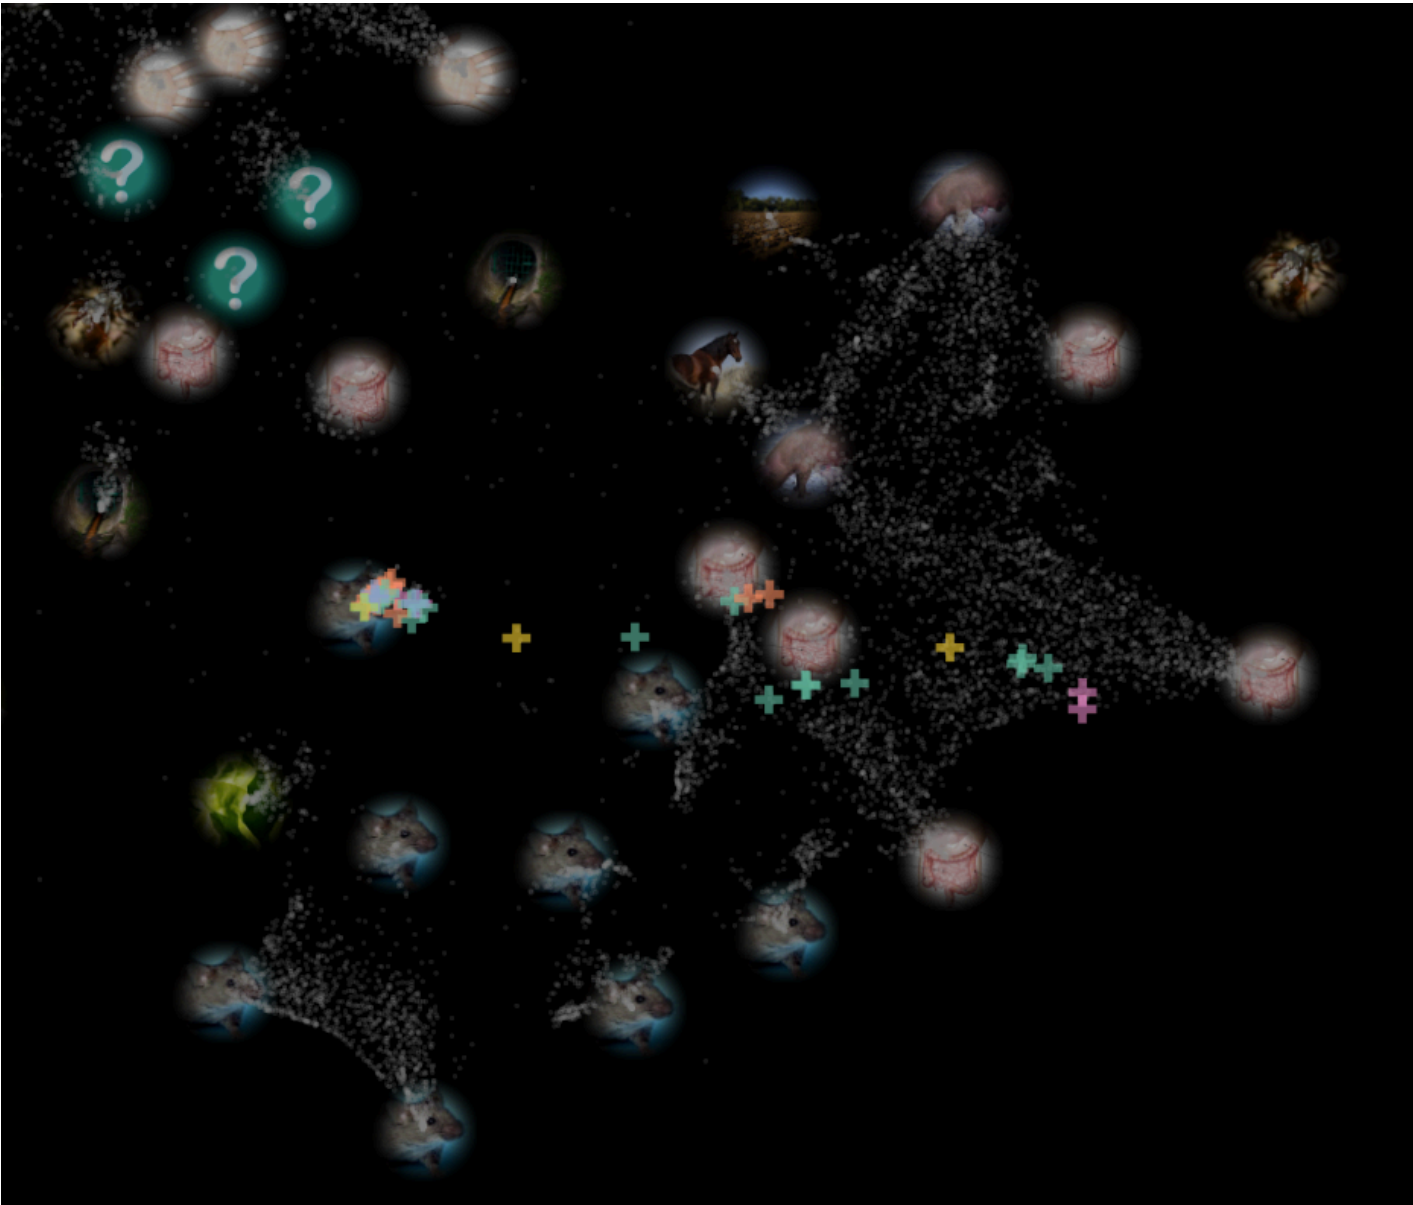

N

Subject DZ15296

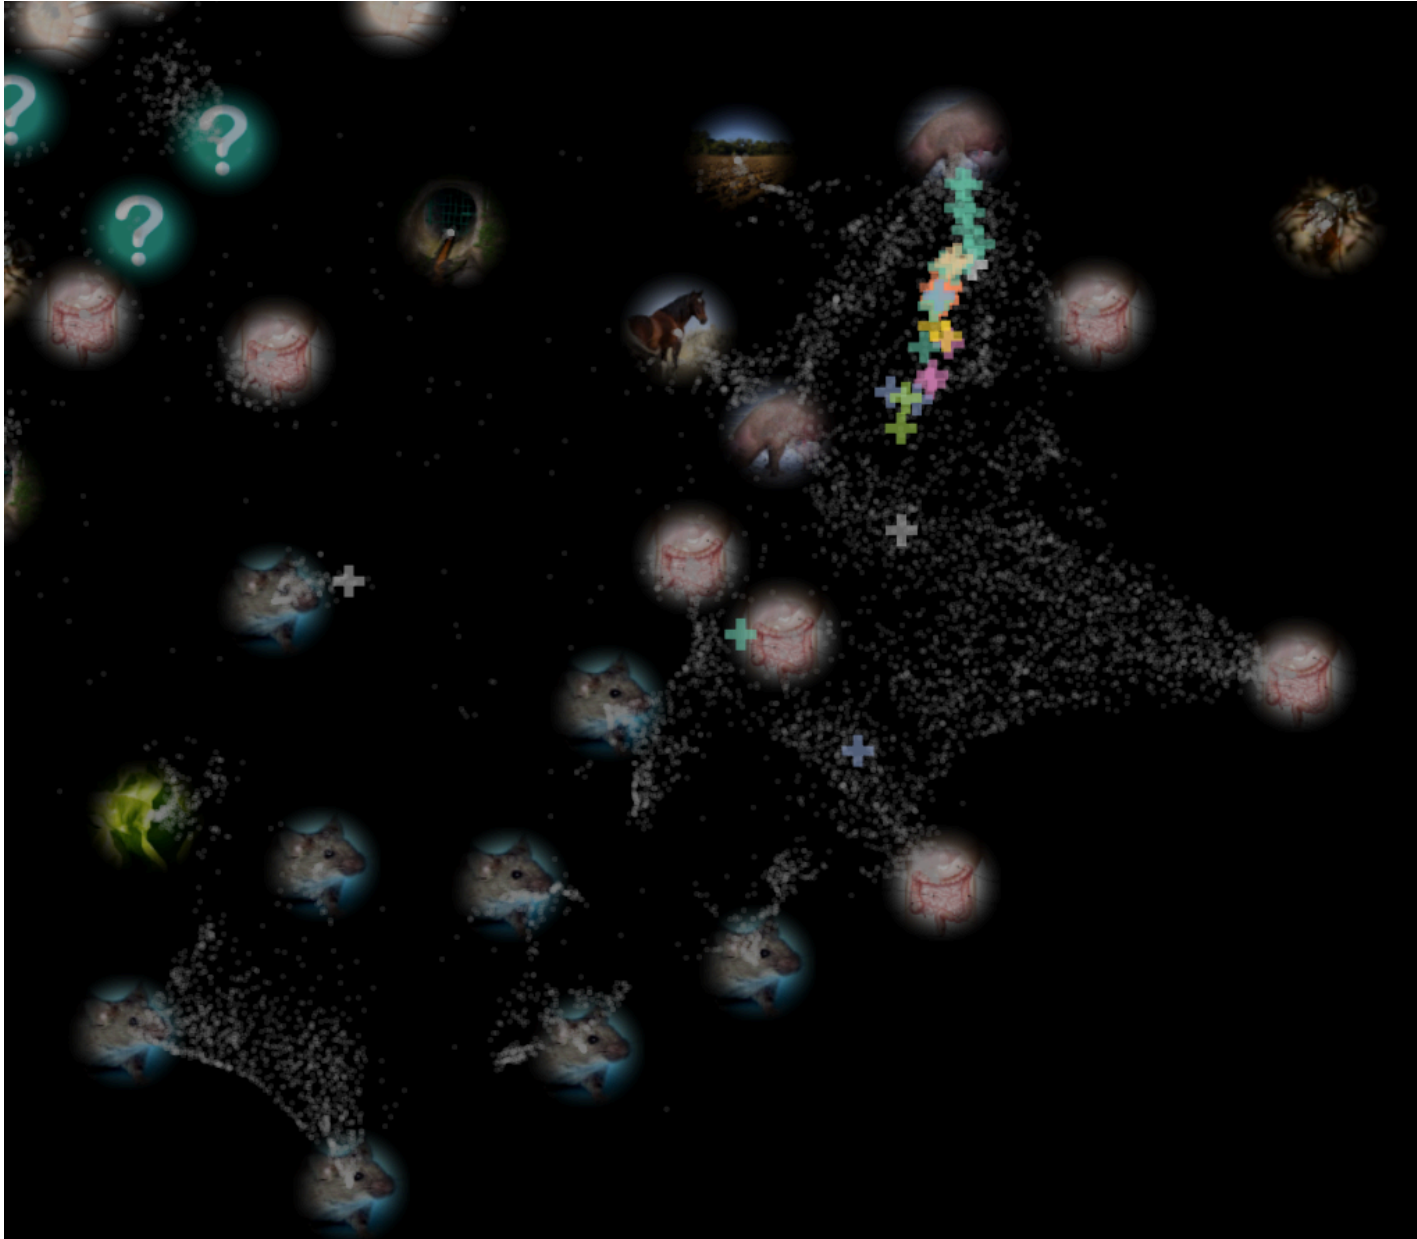

-  PowerSoil
-  PowerMag
-  QIAasympohony
-  Zymo
-  DNA-EZ RW02
-  Maxwell
-  QIAamp
-  Omega
-  Chemagic
-  Unknown

O

# Subject DZ15298

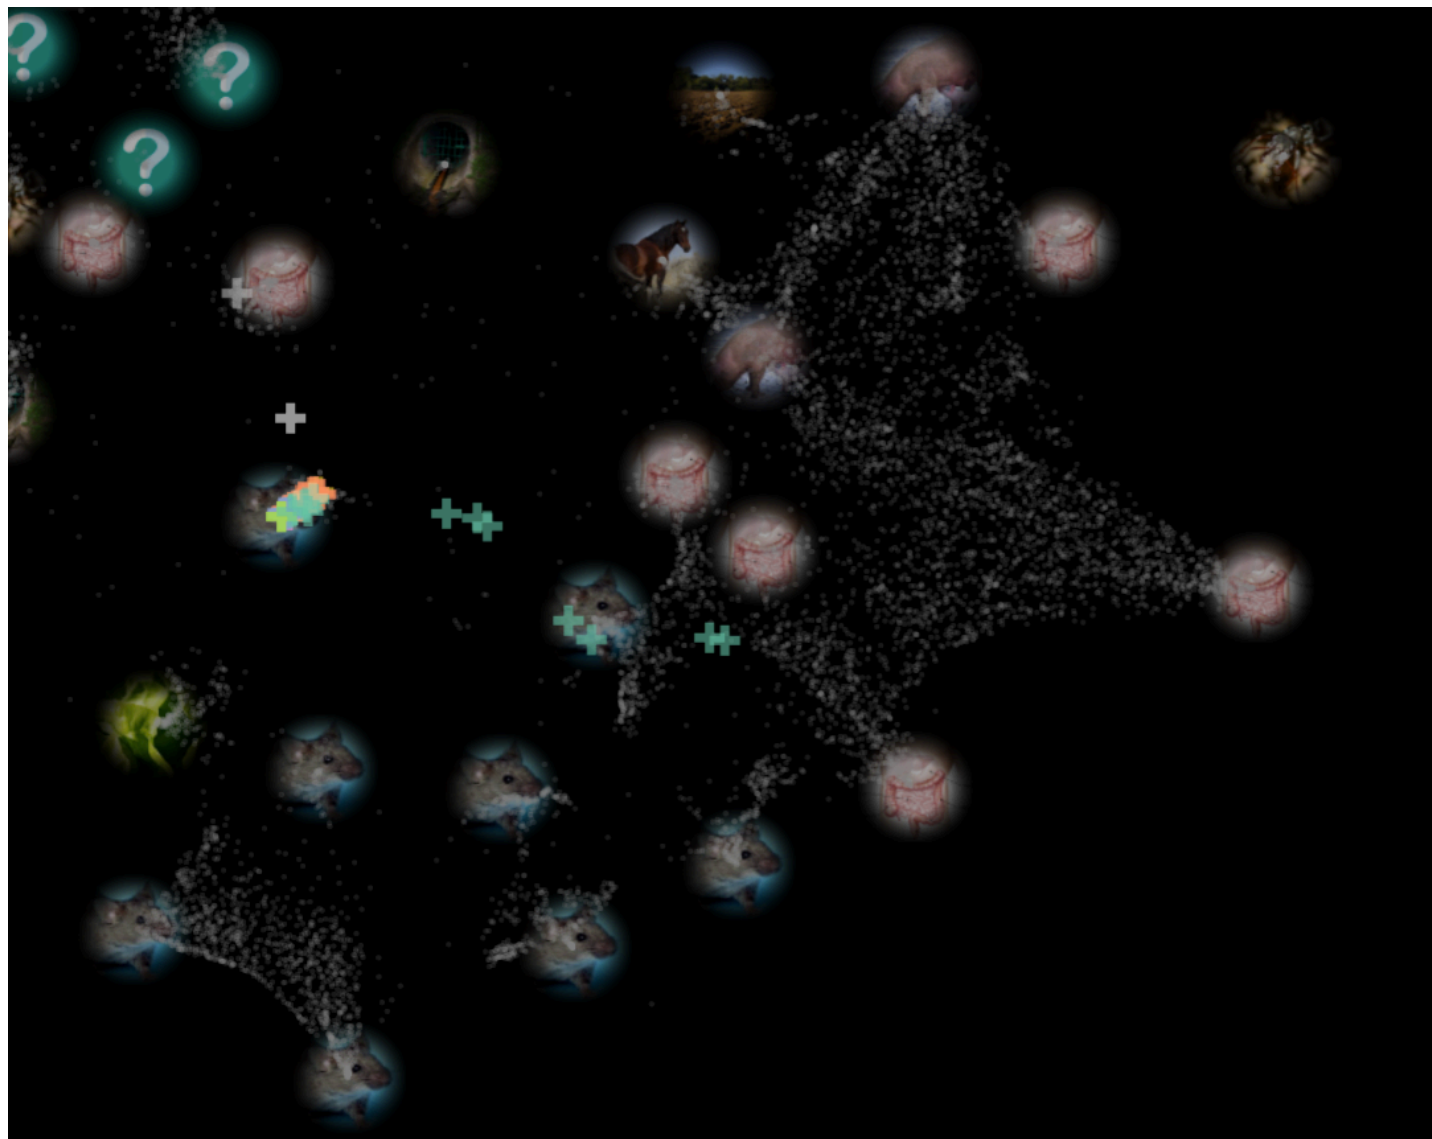

-  PowerSoil
-  PowerMag
-  QIA Symphony
-  Zymo
-  DNA-EZ RW02
-  Maxwell
-  QIAamp
-  Omega
-  Chemagic
-  Unknown

P

# Subject DZ15300

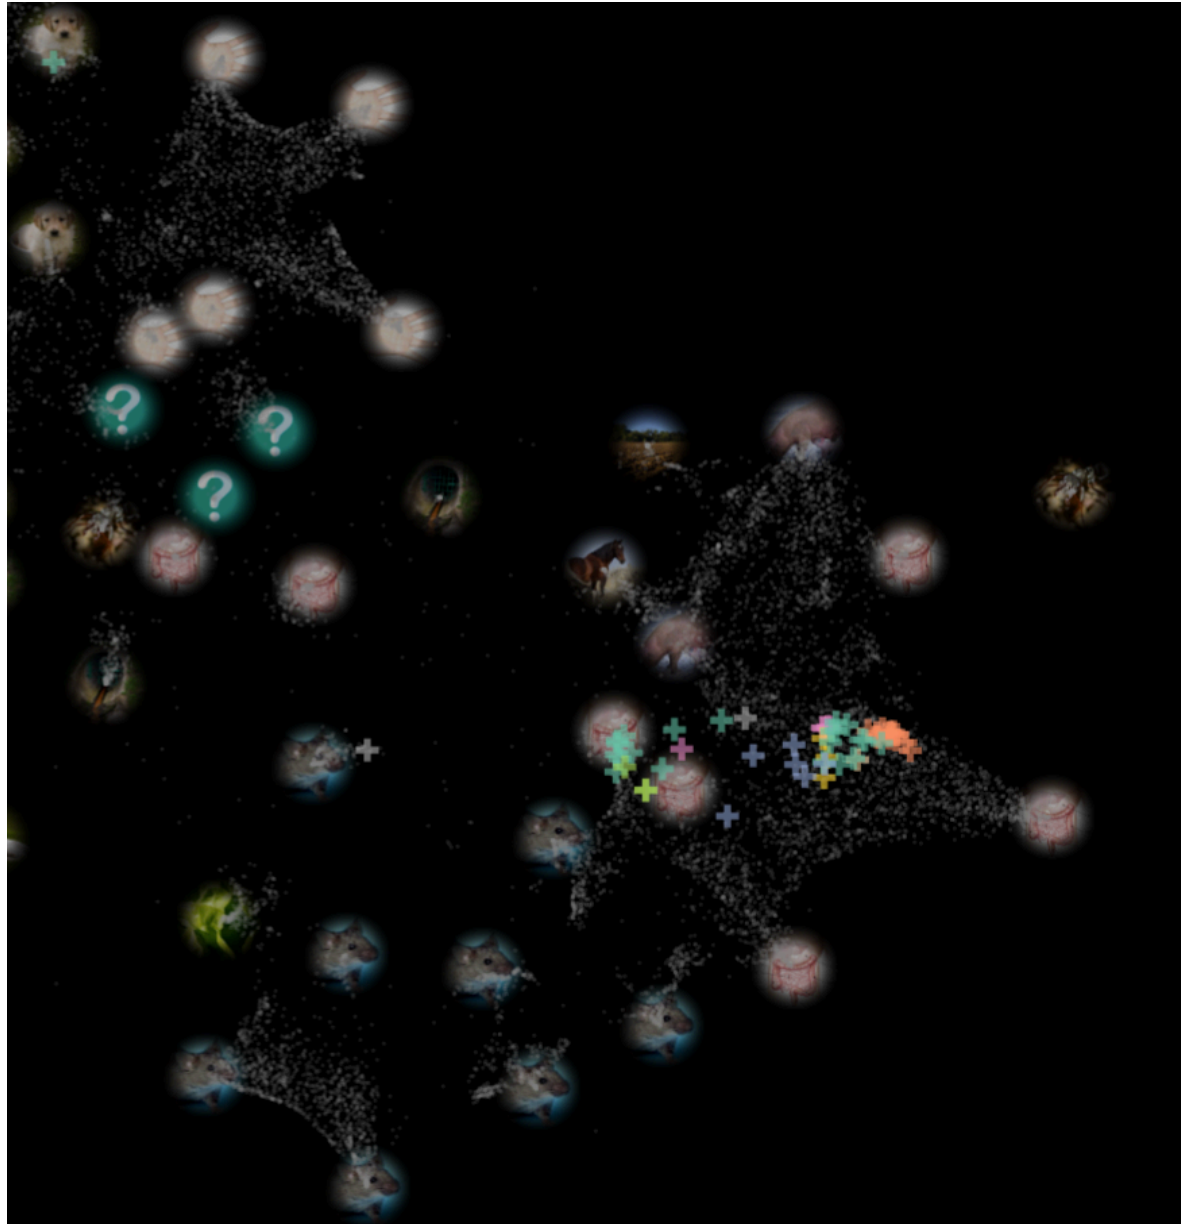

-  PowerSoil
-  PowerMag
-  QIAasympohony
-  Zymo
-  DNA-EZ RW02
-  Maxwell
-  QIAamp
-  Omega
-  Chemagic
-  Unknown



Q

# Subject DZ15302

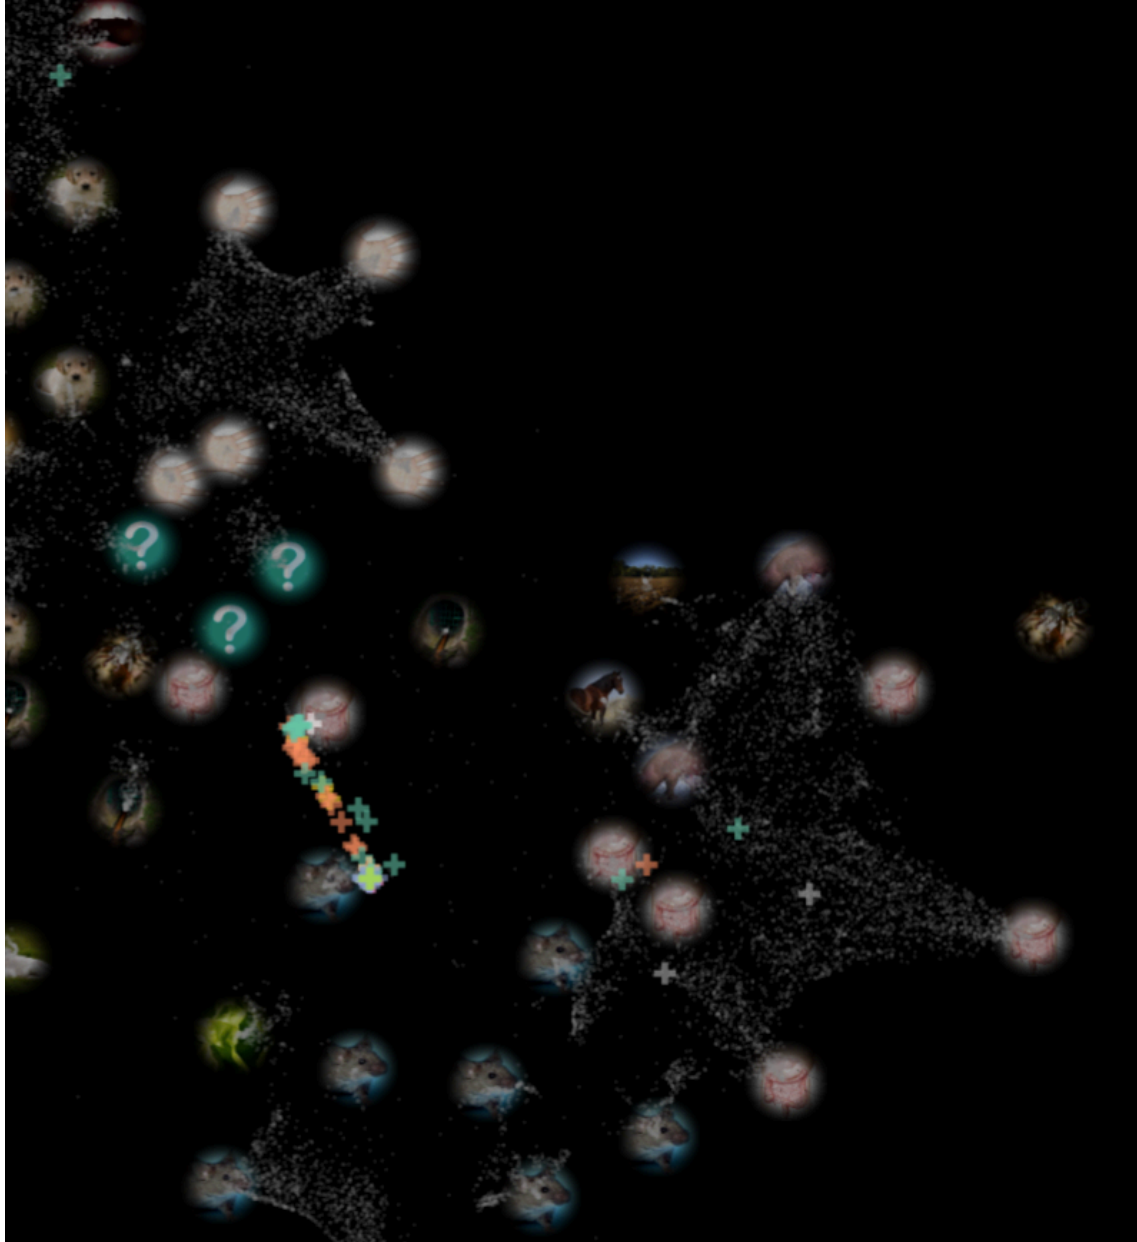

-  PowerSoil
-  PowerMag
-  QIAasympohony
-  Zymo
-  DNA-EZ RW02
-  Maxwell
-  QIAamp
-  Omega
-  Chemagic
-  Unknown

R

Subject DZ15303

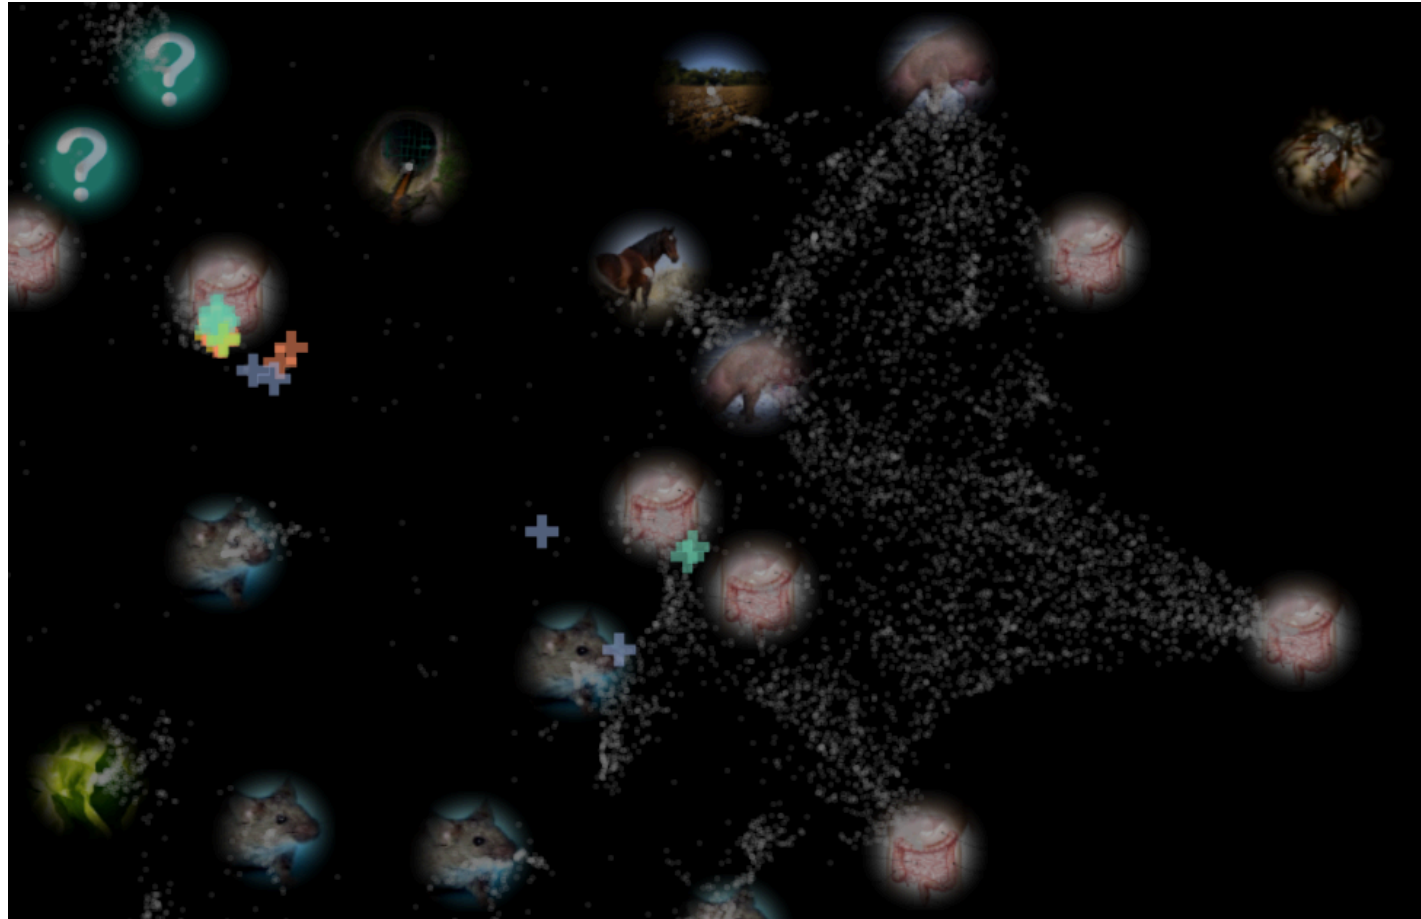

-  PowerSoil
-  PowerMag
-  QIAasympohony
-  Zymo
-  DNA-EZ RW02
-  Maxwell
-  QIAamp
-  Omega
-  Chemagic
-  Unknown

S

# Subject DZ15304

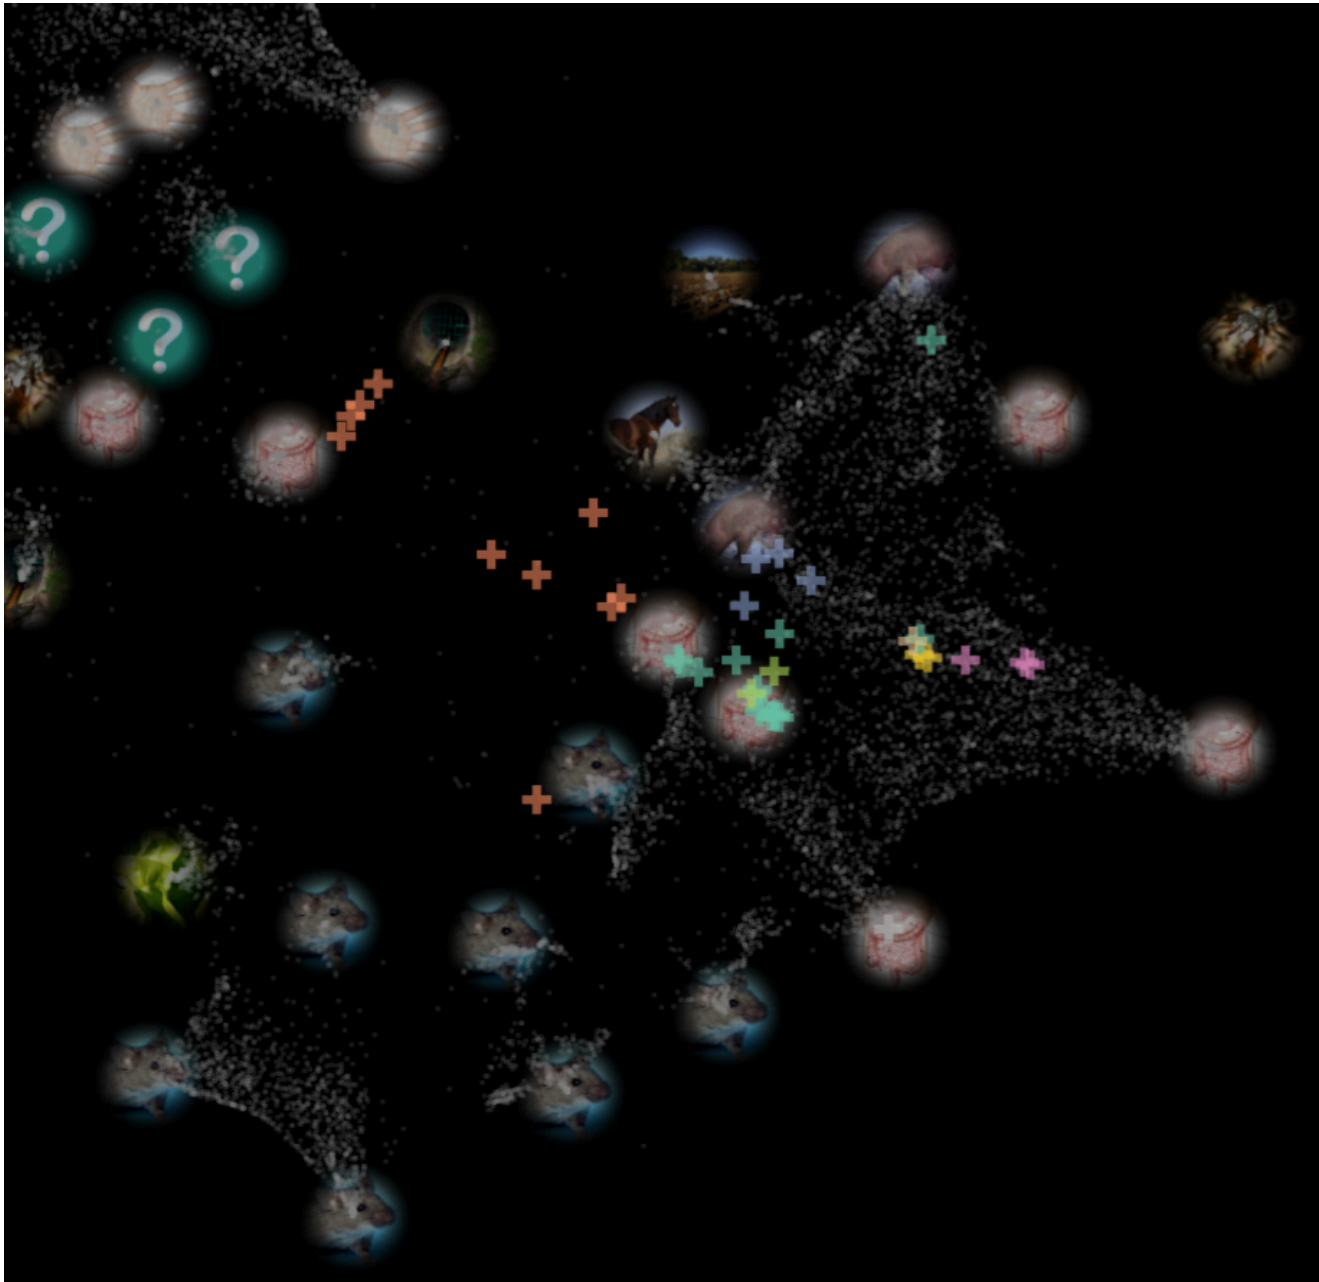

-  PowerSoil
-  PowerMag
-  QIAasympohony
-  Zymo
-  DNA-EZ RW02
-  Maxwell
-  QIAamp
-  Omega
-  Chemagic
-  Unknown
