# Supplementary material for: Latent environment allocation of microbial community data
Source: PLoS Comput Biol. 2018 Jun 6;14(6):e1006143. doi: 10.1371/journal.pcbi.1006143 (PMC6005635; doi:10.1371/journal.pcbi.1006143)
Supplement: S3 Table — (XLSX) [file pcbi.1006143.s014.xlsx]

## Sheet: Sheet1
S3 Table. Vocabulary of taxonomic composition data.
Abiotrophia
Acanthopleuribacter
Acetanaerobacterium
Acetitomaculum
Acetivibrio
Acetoanaerobium
Acetobacter
Acetobacterium
Acetohalobium
Acetomicrobium
Acetonema
Acholeplasma
Achromobacter
Acidaminobacter
Acidaminococcus
Acidianus
Acidicaldus
Acidilobus
Acidimicrobium
Acidiphilium
Acidiplasma
Acidisoma
Acidisphaera
Aciditerrimonas
Acidithiobacillus
Acidobacterium
Acidocella
Acidothermus
Acidovorax
Acinetobacter
Actibacter
Actinoallomurus
Actinoalloteichus
Actinobacillus
Actinobaculum
Actinocatenispora
Actinocorallia
Actinokineospora
Actinomadura
Actinomyces
Actinomycetospora
Actinophytocola
Actinoplanes
Actinopolymorpha
Actinopolyspora
Actinospica
Actinosynnema
Actinotalea
Adhaeribacter
Adlercreutzia
Advenella
Aequorivita
Aeribacillus
Aeriscardovia
Aerococcus
Aeromicrobium
Aeromonas
Aeropyrum
Aestuariibacter
Aestuariicola
Aestuariimicrobium
Afifella
Afipia
Agarivorans
Aggregatibacter
Agreia
Agrococcus
Agromyces
Ahrensia
Akkermansia
Albidovulum
Albimonas
Alcaligenes
Alcanivorax
Algibacter
Algicola
Algoriphagus
Aliagarivorans
Alicycliphilus
Alicyclobacillus
Aliivibrio
Alishewanella
Alistipes
Alkalibacillus
Alkalibacter
Alkalibacterium
Alkalibaculum
Alkaliflexus
Alkalilimnicola
Alkalimonas
Alkaliphilus
Alkanibacter
Alkanindiges
Allisonella
Allobaculum
Allochromatium
Allofustis
Alloiococcus
Allokutzneria
Allomonas
Alloscardovia
Altererythrobacter
Alterococcus
Alteromonas
Alysiella
Amaricoccus
Aminiphilus
Aminobacter
Aminobacterium
Aminomonas
Ammonifex
Ammoniphilus
Amnibacterium
Amorphus
Amphibacillus
Amphritea
Amycolatopsis
Amycolicicoccus
Anaerobacillus
Anaerobacter
Anaerobaculum
Anaerobiospirillum
Anaerobranca
Anaerococcus
Anaerofilum
Anaerofustis
Anaeroglobus
Anaerolinea
Anaeromusa
Anaeromyxobacter
Anaerophaga
Anaeroplasma
Anaerorhabdus
Anaerosinus
Anaerosphaera
Anaerospora
Anaerosporobacter
Anaerostipes
Anaerotruncus
Anaerovibrio
Anaerovirgula
Anaerovorax
Anaplasma
Ancylobacter
Anderseniella
Andreprevotia
Aneurinibacillus
Angustibacter
Anoxybacillus
Anoxynatronum
Antarctobacter
Aquabacterium
Aquamicrobium
Aquaspirillum
Aquicella
Aquifex
Aquiflexum
Aquimarina
Aquimonas
Aquisalimonas
Aquitalea
Arcanobacterium
Archaeoglobus
Arcicella
Arcobacter
Arenibacter
Arenicella
Arenimonas
Arhodomonas
Arsenicicoccus
Arsenophonus
Arthrobacter
Asaia
Asanoa
Asteroleplasma
Asticcacaulis
Atopobacter
Atopobium
Atopococcus
Atopostipes
Aurantimonas
Auraticoccus
Aureispira
Auritidibacter
Austwickia
Avibacterium
Azoarcus
Azohydromonas
Azomonas
Azonexus
Azorhizobium
Azospira
Azospirillum
Azotobacter
Azovibrio
Bacillus
Bacteriovorax
Bacteroides
Balneatrix
Balneola
Barnesiella
Bartonella
Basfia
Bauldia
Bavariicoccus
Bdellovibrio
Beggiatoa
Beijerinckia
Belliella
Bellilinea
Belnapia
Bergeriella
Bergeyella
Bermanella
Beutenbergia
Bhargavaea
Bibersteinia
Bifidobacterium
Bilophila
Bizionia
Blastobacter
Blastochloris
Blastococcus
Blastomonas
Blastopirellula
Blautia
Bogoriella
Bordetella
Borrelia
Bosea
Bowmanella
Brachybacterium
Brachymonas
Brachyspira
Brackiella
Bradyrhizobium
Branchiibius
Brenneria
Brevibacillus
Brevibacterium
Brevinema
Brevundimonas
Brochothrix
Brooklawnia
Brucella
Brumimicrobium
Bryobacter
Bulleidia
Burkholderia
Buttiauxella
Butyricicoccus
Butyricimonas
Butyrivibrio
Byssovorax
Caedibacter
Caenimonas
Caenispirillum
Caldalkalibacillus
Caldanaerobacter
Caldanaerobius
Caldicellulosiruptor
Caldicoprobacter
Caldilinea
Caldimicrobium
Caldimonas
Caldisericum
Caldisphaera
Calditerricola
Calditerrivibrio
Caldithrix
Caldivirga
Caloramator
Caloranaerobacter
Camelimonas
Caminibacter
Caminicella
Campylobacter
Candidatus Korarchaeum
Candidatus Xiphinematobacter
Capnocytophaga
Carboxydocella
Carboxydothermus
Cardiobacterium
Carnimonas
Carnobacterium
Castellaniella
Catellatospora
Catellicoccus
Catelliglobosispora
Catenibacterium
Catenulispora
Catonella
Caulobacter
Celerinatantimonas
Cellulomonas
Cellulophaga
Cellulosilyticum
Cellulosimicrobium
Cellvibrio
Centipeda
Cerasibacillus
Cerasicoccus
Cesiribacter
Cetobacterium
Chelativorans
Chelatococcus
Chelonobacter
Chitinibacter
Chitinilyticum
Chitinimonas
Chitiniphilus
Chitinophaga
Chlamydia
Chlamydophila
Chlorobaculum
Chlorobium
Chloroflexus
Chloroherpeton
Chondromyces
Chromatium
Chromobacterium
Chromohalobacter
Chryseobacterium
Chrysiogenes
Chthonomonas
Citreicella
Citreimonas
Citricoccus
Citrobacter
Clavibacter
Cloacibacillus
Cloacibacterium
Clostridiisalibacter
Clostridium
Cobetia
Cocleimonas
Coenonia
Cohaesibacter
Cohnella
Collimonas
Collinsella
Colwellia
Comamonas
Conchiformibius
Conexibacter
Congregibacter
Coprobacillus
Coprococcus
Coprothermobacter
Coraliomargarita
Corallococcus
Coriobacterium
Corynebacterium
Costertonia
Coxiella
Craurococcus
Croceibacter
Croceicoccus
Croceitalea
Crocinitomix
Cronobacter
Crossiella
Cryobacterium
Cryomorpha
Cryptanaerobacter
Cryptobacterium
Cryptosporangium
Cucumibacter
Cupriavidus
Curtobacterium
Curvibacter
Cyclobacterium
Cycloclasticus
Cystobacter
Cytophaga
Dactylosporangium
Dasania
Dechloromonas
Deefgea
Deferribacter
Defluviicoccus
Dehalobacter
Dehalogenimonas
Deinobacterium
Deinococcus
Delftia
Demequina
Demetria
Dendrosporobacter
Denitratisoma
Denitrobacterium
Denitrovibrio
Dermabacter
Dermacoccus
Dermatophilus
Derxia
Desemzia
Desmospora
Desulfacinum
Desulfarculus
Desulfatibacillum
Desulfatiferula
Desulfatirhabdium
Desulfitibacter
Desulfitispora
Desulfitobacterium
Desulfobacca
Desulfobacter
Desulfobacterium
Desulfobacula
Desulfobotulus
Desulfobulbus
Desulfocapsa
Desulfocella
Desulfococcus
Desulfocurvus
Desulfofaba
Desulfofrigus
Desulfofustis
Desulfoglaeba
Desulfohalobium
Desulfoluna
Desulfomicrobium
Desulfomonile
Desulfonatronospira
Desulfonatronovibrio
Desulfonatronum
Desulfonauticus
Desulfonema
Desulfonispora
Desulfopila
Desulforegula
Desulforhabdus
Desulforhopalus
Desulfosalsimonas
Desulfosarcina
Desulfosoma
Desulfospira
Desulfosporosinus
Desulfotalea
Desulfothermus
Desulfotignum
Desulfotomaculum
Desulfovibrio
Desulfovirga
Desulfovirgula
Desulfurella
Desulfurispira
Desulfurispirillum
Desulfurispora
Desulfurivibrio
Desulfurobacterium
Desulfurococcus
Desulfuromonas
Desulfuromusa
Dethiobacter
Dethiosulfatibacter
Dethiosulfovibrio
Devosia
Dialister
Diaphorobacter
Dickeya
Dictyoglomus
Dietzia
Dinoroseobacter
Dokdonella
Dokdonia
Dolosigranulum
Dongia
Dorea
Duganella
Dyadobacter
Dyella
Dysgonomonas
Echinicola
Ectothiorhodosinus
Ectothiorhodospira
Edaphobacter
Edwardsiella
Eggerthella
Ehrlichia
Eikenella
Eionea
Ekhidna
Elioraea
Elizabethkingia
Elusimicrobium
Empedobacter
Emticicia
Endozoicomonas
Enhydrobacter
Enhygromyxa
Ensifer
Enterobacter
Enterococcus
Enterorhabdus
Enterovibrio
Entomoplasma
Epilithonimonas
Eremococcus
Erwinia
Erysipelothrix
Erythrobacter
Escherichia
Ethanoligenens
Eubacterium
Eudoraea
Euzebya
Euzebyella
Exiguobacterium
Exilispira
Fabibacter
Facklamia
Faecalibacterium
Falsibacillus
Fangia
Fastidiosipila
Ferribacterium
Ferrimicrobium
Ferrimonas
Ferrithrix
Ferroglobus
Ferroplasma
Ferruginibacter
Fervidicoccus
Fervidicola
Fervidobacterium
Fibrella
Fibrisoma
Fibrobacter
Filibacter
Filifactor
Filimonas
Filomicrobium
Finegoldia
Flagellimonas
Flammeovirga
Flavihumibacter
Flavisolibacter
Flavitalea
Flavobacterium
Flavonifractor
Flectobacillus
Flexibacter
Flexistipes
Flexithrix
Fluviicola
Fodinicola
Fodinicurvata
Fontibacillus
Fontibacter
Formivibrio
Formosa
Francisella
Frateuria
Friedmanniella
Frigoribacterium
Fructobacillus
Fulvibacter
Fulvimarina
Fulvimonas
Fulvivirga
Fusibacter
Fusobacterium
Gaetbulibacter
Galbibacter
Gallaecimonas
Gallibacterium
Gallicola
Gangjinia
Garciella
Gardnerella
Gelidibacter
Gelria
Gemella
Geminicoccus
Gemmata
Gemmatimonas
Gemmiger
Gemmobacter
Geoalkalibacter
Geobacillus
Geobacter
Geodermatophilus
Geopsychrobacter
Georgenia
Georgfuchsia
Geosporobacter
Geothermobacter
Geothrix
Geotoga
Geovibrio
Gillisia
Gilvibacter
Gilvimarinus
Glaciecola
Globicatella
Gluconacetobacter
Gluconobacter
Glycomyces
Gordonia
Gordonibacter
Gracilibacillus
Gracilibacter
Gracilimonas
Gramella
Granulibacter
Granulicatella
Granulicella
Granulosicoccus
Grimontia
Guggenheimella
Gulbenkiania
Gulosibacter
Haematobacter
Haemophilus
Hafnia
Hahella
Haladaptatus
Halalkalibacillus
Halalkalicoccus
Halanaerobacter
Halanaerobaculum
Halanaerobium
Halarchaeum
Halarsenatibacter
Haliangium
Haliea
Haliscomenobacter
Hallella
Haloactinospora
Haloarcula
Halobacillus
Halobacterium
Halobacteroides
Halobaculum
Halobiforma
Halocella
Halochromatium
Halococcus
Haloferax
Haloferula
Halogeometricum
Haloglycomyces
Halogranum
Halolactibacillus
Halolamina
Halomarina
Halomicrobium
Halomonas
Halonatronum
Halonotius
Halopelagius
Halopiger
Haloplanus
Haloplasma
Haloquadratum
Halorhabdus
Halorhodospira
Halorubrum
Halosarcina
Halosimplex
Halospina
Halostagnicola
Halotalea
Haloterrigena
Halothermothrix
Halothiobacillus
Halovibrio
Halovivax
Hamadaea
Hansschlegelia
Helcobacillus
Helcococcus
Helicobacter
Heliobacillus
Heliobacterium
Heliophilum
Heliorestis
Heliothrix
Hellea
Henriciella
Herbaspirillum
Herbiconiux
Herminiimonas
Herpetosiphon
Hespellia
Hippea
Hirschia
Histophilus
Hoeflea
Holdemania
Holophaga
Howardella
Hoyosella
Humibacter
Hwanghaeicola
Hyalangium
Hydrocarboniphaga
Hydrogenimonas
Hydrogenivirga
Hydrogenoanaerobacterium
Hydrogenobacter
Hydrogenobaculum
Hydrogenophaga
Hydrogenophilus
Hydrotalea
Hylemonella
Hymenobacter
Hyphomicrobium
Hyphomonas
Hyunsoonleella
Iamia
Ideonella
Idiomarina
Ignatzschineria
Ignavibacterium
Ignavigranum
Ignicoccus
Ignisphaera
Ilumatobacter
Indibacter
Inhella
Inquilinus
Insolitispirillum
Intrasporangium
Iodobacter
Isochromatium
Isoptericola
Isosphaera
Janibacter
Jannaschia
Janthinobacterium
Jejuia
Jeongeupia
Jeotgalibacillus
Jeotgalicoccus
Jiangella
Johnsonella
Jonesia
Jonquetella
Joostella
Kaistia
Kangiella
Ketogulonicigenium
Kibdelosporangium
Kiloniella
Kineococcus
Kineosphaera
Kineosporia
Kingella
Kistimonas
Kitasatospora
Klebsiella
Kluyvera
Knoellia
Kocuria
Kofleria
Kordia
Kordiimonas
Kosmotoga
Kozakia
Krasilnikovia
Kribbella
Kriegella
Ktedonobacter
Kurthia
Kushneria
Kutzneria
Kytococcus
Labrenzia
Labrys
Laceyella
Lachnobacterium
Lacibacter
Lacinutrix
Lacticigenium
Lactobacillus
Lactococcus
Lactonifactor
Lamprocystis
Lampropedia
Lapillicoccus
Laribacter
Larkinella
Lawsonia
Leadbetterella
Lebetimonas
Leclercia
Leeia
Leeuwenhoekiella
Legionella
Leifsonia
Leisingera
Leminorella
Lentibacillus
Lentisphaera
Lentzea
Leptobacterium
Leptolinea
Leptonema
Leptospira
Leptospirillum
Leptothrix
Leptotrichia
Leucobacter
Leuconostoc
Leucothrix
Levilinea
Lewinella
Limibacter
Limnobacter
Limnohabitans
Lishizhenia
Listeria
Litoreibacter
Litoribacter
Litoricola
Litorimonas
Loktanella
Lonepinella
Longilinea
Longispora
Luedemannella
Lutaonella
Luteibacter
Luteimonas
Luteipulveratus
Luteococcus
Luteolibacter
Lutibacter
Lutimaribacter
Lutimonas
Lutispora
Lysinibacillus
Lysobacter
Macrococcus
Macromonas
Magnetospirillum
Mahella
Malikia
Malonomonas
Mangrovibacter
Mannheimia
Maribacter
Maribius
Maricaulis
Marichromatium
Marihabitans
Marinicella
Marinifilum
Mariniflexile
Marinilabilia
Marinilactibacillus
Marinimicrobium
Marinithermus
Marinitoga
Marinobacter
Marinobacterium
Marinococcus
Marinomonas
Marinoscillum
Marinospirillum
Mariprofundus
Marisediminicola
Marispirillum
Maritalea
Marivirga
Marivita
Marixanthomonas
Marmoricola
Martelella
Marvinbryantia
Massilia
Mechercharimyces
Megamonas
Meganema
Megasphaera
Meiothermus
Melissococcus
Melitea
Meniscus
Meridianimaribacter
Mesoflavibacter
Mesonia
Mesoplasma
Mesorhizobium
Metallosphaera
Methanimicrococcus
Methanobacterium
Methanobrevibacter
Methanocalculus
Methanocaldococcus
Methanocella
Methanococcoides
Methanococcus
Methanocorpusculum
Methanoculleus
Methanofollis
Methanogenium
Methanohalobium
Methanohalophilus
Methanolinea
Methanolobus
Methanomethylovorans
Methanomicrobium
Methanoplanus
Methanopyrus
Methanoregula
Methanosaeta
Methanosalsum
Methanosarcina
Methanosphaera
Methanosphaerula
Methanospirillum
Methanothermobacter
Methanothermococcus
Methanothermus
Methanotorris
Methermicoccus
Methylarcula
Methylobacillus
Methylobacter
Methylobacterium
Methylocaldum
Methylocapsa
Methylocella
Methylococcus
Methylocystis
Methylohalobius
Methylohalomonas
Methylomicrobium
Methylomonas
Methylonatrum
Methylophaga
Methylophilus
Methylosarcina
Methylosinus
Methylosoma
Methylosphaera
Methylotenera
Methylothermus
Methyloversatilis
Methylovorus
Methylovulum
Microaerobacter
Microbacterium
Microbispora
Microbulbifer
Microcella
Micrococcus
Microlunatus
Micromonospora
Micropruina
Microscilla
Microterricola
Microvirga
Microvirgula
Millisia
Miniimonas
Mitsuaria
Mitsuokella
Mobilicoccus
Mobiluncus
Modestobacter
Modicisalibacter
Mogibacterium
Moorella
Moraxella
Morganella
Moritella
Moryella
Mucilaginibacter
Mucispirillum
Murdochiella
Muricauda
Muriicola
Myceligenerans
Mycetocola
Mycobacterium
Mycoplasma
Myroides
Myxococcus
Nakamurella
Nannocystis
Nanoarchaeum
Natranaerobius
Natrialba
Natrinema
Natroniella
Natronincola
Natronoarchaeum
Natronobacterium
Natronocella
Natronococcus
Natronolimnobius
Natronomonas
Natronorubrum
Natronovirga
Nautella
Nautilia
Negativicoccus
Neisseria
Neoasaia
Neochlamydia
Neorickettsia
Neptuniibacter
Neptunomonas
Nereida
Nesiotobacter
Nesterenkonia
Nevskia
Niabella
Niastella
Nicoletella
Nisaea
Nitratifractor
Nitratireductor
Nitratiruptor
Nitriliruptor
Nitrincola
Nitritalea
Nitrobacter
Nitrococcus
Nitrosococcus
Nitrosomonas
Nitrosospira
Nocardia
Nocardioides
Nocardiopsis
Nonlabens
Nonomuraea
Nosocomiicoccus
Novispirillum
Novosphingobium
Nubsella
Oceanibaculum
Oceanicaulis
Oceanicola
Oceanimonas
Oceaniserpentilla
Oceanisphaera
Oceanithermus
Oceanobacillus
Oceanospirillum
Oceanotoga
Ochrobactrum
Octadecabacter
Odoribacter
Oenococcus
Oerskovia
Ohtaekwangia
Okibacterium
Oleibacter
Oleiphilus
Oleispira
Oligella
Olivibacter
Olleya
Olsenella
Opitutus
Orbus
Orenia
Oribacterium
Orientia
Ornithinibacillus
Ornithinicoccus
Ornithinimicrobium
Ornithobacterium
Oryzihumus
Oscillibacter
Ottowia
Owenweeksia
Oxalicibacterium
Oxalobacter
Oxobacter
Paenalcaligenes
Paenibacillus
Paenisporosarcina
Paenochrobactrum
Palaeococcus
Paludibacter
Paludibacterium
Pandoraea
Pannonibacter
Pantoea
Papillibacter
Parabacteroides
Parachlamydia
Paracoccus
Paraeggerthella
Paraferrimonas
Paraliobacillus
Paramoritella
Parapedobacter
Paraprevotella
Parascardovia
Parasegetibacter
Parasporobacterium
Parasutterella
Parvibaculum
Parvimonas
Parvularcula
Pasteurella
Pasteuria
Patulibacter
Paucibacter
Paucimonas
Pectinatus
Pectobacterium
Pediococcus
Pedobacter
Pedomicrobium
Pelagibaca
Pelagibius
Pelagicoccus
Pelagicola
Pelistega
Pelobacter
Pelomonas
Pelosinus
Pelospora
Pelotomaculum
Peptococcus
Peptoniphilus
Peptostreptococcus
Peredibacter
Perexilibacter
Perlucidibaca
Persephonella
Persicirhabdus
Persicitalea
Persicobacter
Petrimonas
Petrotoga
Phaeobacter
Phaeospirillum
Phaeovibrio
Phascolarctobacterium
Phaselicystis
Phenylobacterium
Phocaeicola
Phocoenobacter
Photobacterium
Photorhabdus
Phycicoccus
Phycisphaera
Phyllobacterium
Pibocella
Picrophilus
Pigmentiphaga
Pilibacter
Pilimelia
Pimelobacter
Piscibacillus
Piscinibacter
Piscirickettsia
Planctomyces
Planifilum
Planococcus
Planomicrobium
Plantibacter
Pleomorphomonas
Plesiocystis
Plesiomonas
Polaribacter
Polaromonas
Polynucleobacter
Pontibaca
Pontibacillus
Pontibacter
Ponticaulis
Ponticoccus
Porphyrobacter
Porphyromonas
Porticoccus
Prauserella
Prevotella
Primorskyibacter
Prolixibacter
Promicromonospora
Propionibacterium
Propionicicella
Propionicimonas
Propioniferax
Propionigenium
Propionimicrobium
Propionispora
Propionivibrio
Prosthecobacter
Prosthecochloris
Prosthecomicrobium
Proteiniborus
Proteiniclasticum
Proteiniphilum
Proteocatella
Proteus
Providencia
Pseudacidovorax
Pseudaminobacter
Pseudoalteromonas
Pseudobutyrivibrio
Pseudochrobactrum
Pseudoclavibacter
Pseudoflavonifractor
Pseudofulvimonas
Pseudolabrys
Pseudomonas
Pseudonocardia
Pseudoramibacter
Pseudorhodobacter
Pseudoruegeria
Pseudosphingobacterium
Pseudospirillum
Pseudosporangium
Pseudovibrio
Pseudoxanthobacter
Pseudoxanthomonas
Pseudozobellia
Psychrilyobacter
Psychrobacillus
Psychrobacter
Psychroflexus
Psychromonas
Psychroserpens
Psychrosinus
Psychrosphaera
Pullulanibacillus
Puniceicoccus
Pusillimonas
Pyramidobacter
Pyrobaculum
Pyrococcus
Pyrodictium
Pyrolobus
Quadrisphaera
Rahnella
Ralstonia
Ramlibacter
Raoultella
Rapidithrix
Rarobacter
Rathayibacter
Reichenbachiella
Reinekea
Renibacterium
Rheinheimera
Rhizobacter
Rhizobium
Rhizomicrobium
Rhodanobacter
Rhodobaca
Rhodobacter
Rhodobium
Rhodoblastus
Rhodocista
Rhodococcus
Rhodocyclus
Rhodocytophaga
Rhodoferax
Rhodoglobus
Rhodomicrobium
Rhodonellum
Rhodopila
Rhodopirellula
Rhodoplanes
Rhodospira
Rhodospirillum
Rhodothalassium
Rhodothermus
Rhodovarius
Rhodovibrio
Rhodovulum
Rickettsia
Riemerella
Rikenella
Rivibacter
Robiginitalea
Robiginitomaculum
Robinsoniella
Roseateles
Roseburia
Roseibaca
Roseibacillus
Roseibacterium
Roseibium
Roseicyclus
Roseiflexus
Roseivirga
Roseivivax
Roseococcus
Roseomonas
Roseospira
Roseospirillum
Roseovarius
Rothia
Ruania
Rubellimicrobium
Rubribacterium
Rubrimonas
Rubritalea
Rubritepida
Rubrivivax
Rubrobacter
Rudaea
Rudanella
Ruegeria
Ruminobacter
Ruminococcus
Rummeliibacillus
Runella
Saccharibacillus
Saccharibacter
Saccharococcus
Saccharofermentans
Saccharomonospora
Saccharophagus
Saccharopolyspora
Saccharospirillum
Saccharothrix
Sagittula
Salarchaeum
Salegentibacter
Salicola
Salimicrobium
Salinarimonas
Salinibacillus
Salinibacter
Salinibacterium
Salinicoccus
Salinicola
Salinimicrobium
Salinimonas
Salinisphaera
Salinispora
Salinivibrio
Salirhabdus
Salisaeta
Salmonella
Salsuginibacillus
Sandaracinobacter
Sandarakinorhabdus
Sanguibacter
Saprospira
Sarcina
Scardovia
Schlesneria
Schwartzia
Sciscionella
Sebaldella
Sedimentibacter
Sedimenticola
Sediminibacillus
Sediminibacter
Sediminibacterium
Sediminicola
Sediminimonas
Sediminitomix
Segetibacter
Segniliparus
Seinonella
Selenihalanaerobacter
Selenomonas
Seohaeicola
Serinicoccus
Serpens
Serratia
Sharpea
Shewanella
Shimazuella
Shimia
Shinella
Shuttleworthia
Silanimonas
Silvimonas
Simiduia
Simkania
Simonsiella
Simplicispira
Singulisphaera
Sinobaca
Sinomonas
Sinorhizobium
Siphonobacter
Skermanella
Skermania
Slackia
Smaragdicoccus
Smithella
Sneathia
Sneathiella
Sodalis
Soehngenia
Solibacillus
Solimonas
Solirubrobacter
Solitalea
Solobacterium
Soonwooa
Sorangium
Sphaerisporangium
Sphaerobacter
Sphaerotilus
Sphingobacterium
Sphingobium
Sphingomonas
Sphingopyxis
Sphingosinicella
Spirillospora
Spirillum
Spirochaeta
Spiroplasma
Spirosoma
Spongiibacter
Spongiispira
Sporacetigenium
Sporanaerobacter
Sporichthya
Sporobacter
Sporobacterium
Sporocytophaga
Sporohalobacter
Sporolactobacillus
Sporolituus
Sporomusa
Sporosarcina
Sporotomaculum
Stackebrandtia
Stakelama
Staphylococcus
Staphylothermus
Stappia
Starkeya
Stella
Stenotrophomonas
Stenoxybacter
Steroidobacter
Sterolibacterium
Stigmatella
Streptacidiphilus
Streptoalloteichus
Streptobacillus
Streptococcus
Streptomonospora
Streptomyces
Streptosporangium
Stygiolobus
Subdoligranulum
Subsaxibacter
Subsaximicrobium
Subtercola
Succinatimonas
Succiniclasticum
Succinimonas
Succinispira
Succinivibrio
Sulfitobacter
Sulfobacillus
Sulfolobus
Sulfuricella
Sulfuricurvum
Sulfurihydrogenibium
Sulfurimonas
Sulfuritalea
Sulfurivirga
Sulfurospirillum
Sulfurovum
Sutterella
Suttonella
Symbiobacterium
Synergistes
Syntrophaceticus
Syntrophobacter
Syntrophobotulus
Syntrophococcus
Syntrophomonas
Syntrophorhabdus
Syntrophothermus
Syntrophus
Tamlana
Tannerella
Tateyamaria
Tatumella
Taylorella
Telluria
Telmatospirillum
Tenacibaculum
Tepidamorphus
Tepidanaerobacter
Tepidibacter
Tepidicella
Tepidimicrobium
Tepidimonas
Tepidiphilus
Terasakiella
Teredinibacter
Terracoccus
Terribacillus
Terriglobus
Terrimonas
Tessaracoccus
Tetragenococcus
Tetrasphaera
Thalassobacillus
Thalassobacter
Thalassobaculum
Thalassobius
Thalassococcus
Thalassolituus
Thalassomonas
Thalassospira
Thauera
Thermacetogenium
Thermaerobacter
Thermanaeromonas
Thermanaerovibrio
Thermasporomyces
Thermicanus
Thermincola
Thermithiobacillus
Thermoactinomyces
Thermoanaerobacter
Thermoanaerobacterium
Thermobacillus
Thermobifida
Thermobispora
Thermochromatium
Thermocladium
Thermococcus
Thermocrinis
Thermocrispum
Thermodesulfatator
Thermodesulfobacterium
Thermodesulfobium
Thermodesulforhabdus
Thermodesulfovibrio
Thermofilum
Thermoflavimicrobium
Thermogemmatispora
Thermogymnomonas
Thermohalobacter
Thermohydrogenium
Thermoleophilum
Thermolithobacter
Thermomicrobium
Thermomonas
Thermomonospora
Thermonema
Thermoplasma
Thermopolyspora
Thermoproteus
Thermosediminibacter
Thermosipho
Thermosphaera
Thermosporothrix
Thermosulfidibacter
Thermosyntropha
Thermotalea
Thermotoga
Thermovenabulum
Thermovibrio
Thermovirga
Thermus
Thioalkalicoccus
Thioalkalimicrobium
Thioalkalispira
Thioalkalivibrio
Thiobacillus
Thiobacter
Thiocapsa
Thiocystis
Thiodictyon
Thiofaba
Thioflavicoccus
Thiohalocapsa
Thiohalomonas
Thiohalophilus
Thiohalorhabdus
Thiohalospira
Thiolamprovum
Thiomicrospira
Thiomonas
Thiophaeococcus
Thioprofundum
Thioreductor
Thiorhodococcus
Thiorhodospira
Thiorhodovibrio
Thiothrix
Thiovirga
Thorsellia
Tindallia
Tissierella
Tistlia
Tistrella
Tolumonas
Tomitella
Trabulsiella
Tranquillimonas
Treponema
Trichococcus
Tropheryma
Tropicibacter
Tropicimonas
Truepera
Trueperella
Tsukamurella
Tuberibacillus
Tumebacillus
Turicella
Turicibacter
Turneriella
Uliginosibacterium
Ulvibacter
Umboniibacter
Undibacterium
Ureaplasma
Ureibacillus
Uruburuella
Vagococcus
Vampirovibrio
Varibaculum
Variovorax
Vasilyevaea
Veillonella
Verminephrobacter
Verrucomicrobium
Vibrio
Victivallis
Virgibacillus
Virgisporangium
Viridibacillus
Vitellibacter
Vitreoscilla
Vogesella
Volucribacter
Vulcanibacillus
Vulcanisaeta
Vulcanithermus
Waddlia
Wandonia
Wautersiella
Weeksella
Weissella
Wenxinia
Williamsia
Winogradskyella
Wohlfahrtiimonas
Wolbachia
Wolinella
Woodsholea
Xanthobacter
Xanthomonas
Xenophilus
Xenorhabdus
Xylanimonas
Xylella
Xylophilus
Yaniella
Yersinia
Yimella
Yokenella
Yonghaparkia
Zavarzinella
Zeaxanthinibacter
Zhihengliuella
Zhouia
Zobellella
Zobellia
Zoogloea
Zooshikella
Zunongwangia
Zymobacter
Zymomonas
Zymophilus
